# Supplementary material for: I2-Catalyzed Carbonylation of α-Methylene Ketones to Synthesize 1,2-Diaryl Diketones and Antiviral Quinoxalines in One Pot
Source: PubMed Central journal article supplement — ACS Omega. 2021 Dec 21;7(1):1380–94. doi: 10.1021/acsomega.1c06017 (PMC8757360; doi:10.1021/acsomega.1c06017), 2021-12-21
Supplement: ao1c06017_si_001.pdf [file ao1c06017_si_001.pdf]

## Supporting Information

### **I<sub>2</sub>-Catalyzed Carbonylation of $\alpha$ -Methylene Ketones to Synthesize 1,2-Diaryl Diketones and Antiviral Quinoxalines in One Pot**

Lingkai Kong<sup>1,2</sup>, Jieru Meng<sup>1</sup>, Wenyue Tian<sup>1</sup>, Jiazheng Liu<sup>1</sup>, Xueping Hu<sup>2</sup>, Zhi-Hong Jiang<sup>1</sup>, Wei Zhang<sup>1</sup>, Yanzhong Li<sup>3,\*</sup>, and Li-Ping Bai<sup>1,\*</sup>

<sup>1</sup> State Key Laboratory of Quality Research in Chinese Medicine, Macau Institute for Applied Research in Medicine and Health, Guangdong-Hong Kong-Macao Joint Laboratory of Respiratory Infectious Disease, Macau University of Science and Technology, Taipa, Macau, People's Republic of China.

<sup>2</sup> School of Chemistry and Chemical Engineering, Linyi University, Linyi, Shandong 276000, People's Republic of China.

<sup>3</sup> School of Chemistry and Molecular Engineering, East China Normal University, Shanghai 200241, China.

#### **Table of content**

**Scheme S1** Twenty quinoxalines from diketones **2a** - **2t**

**Table S1** Calculated binding energy (kcal/ mol) of twenty quinoxalines with human ACE2 and SARS-CoV-2 spike RBD proteins by molecular docking study

**Supplementary Figure 1- Supplementary Figure 74** The <sup>1</sup>H- and <sup>13</sup>C-NMR spectra of the products **2** and **4**.

**Supplementary Figure 75- Supplementary Figure 111** HRMS spectra of the products **2** and **4**.

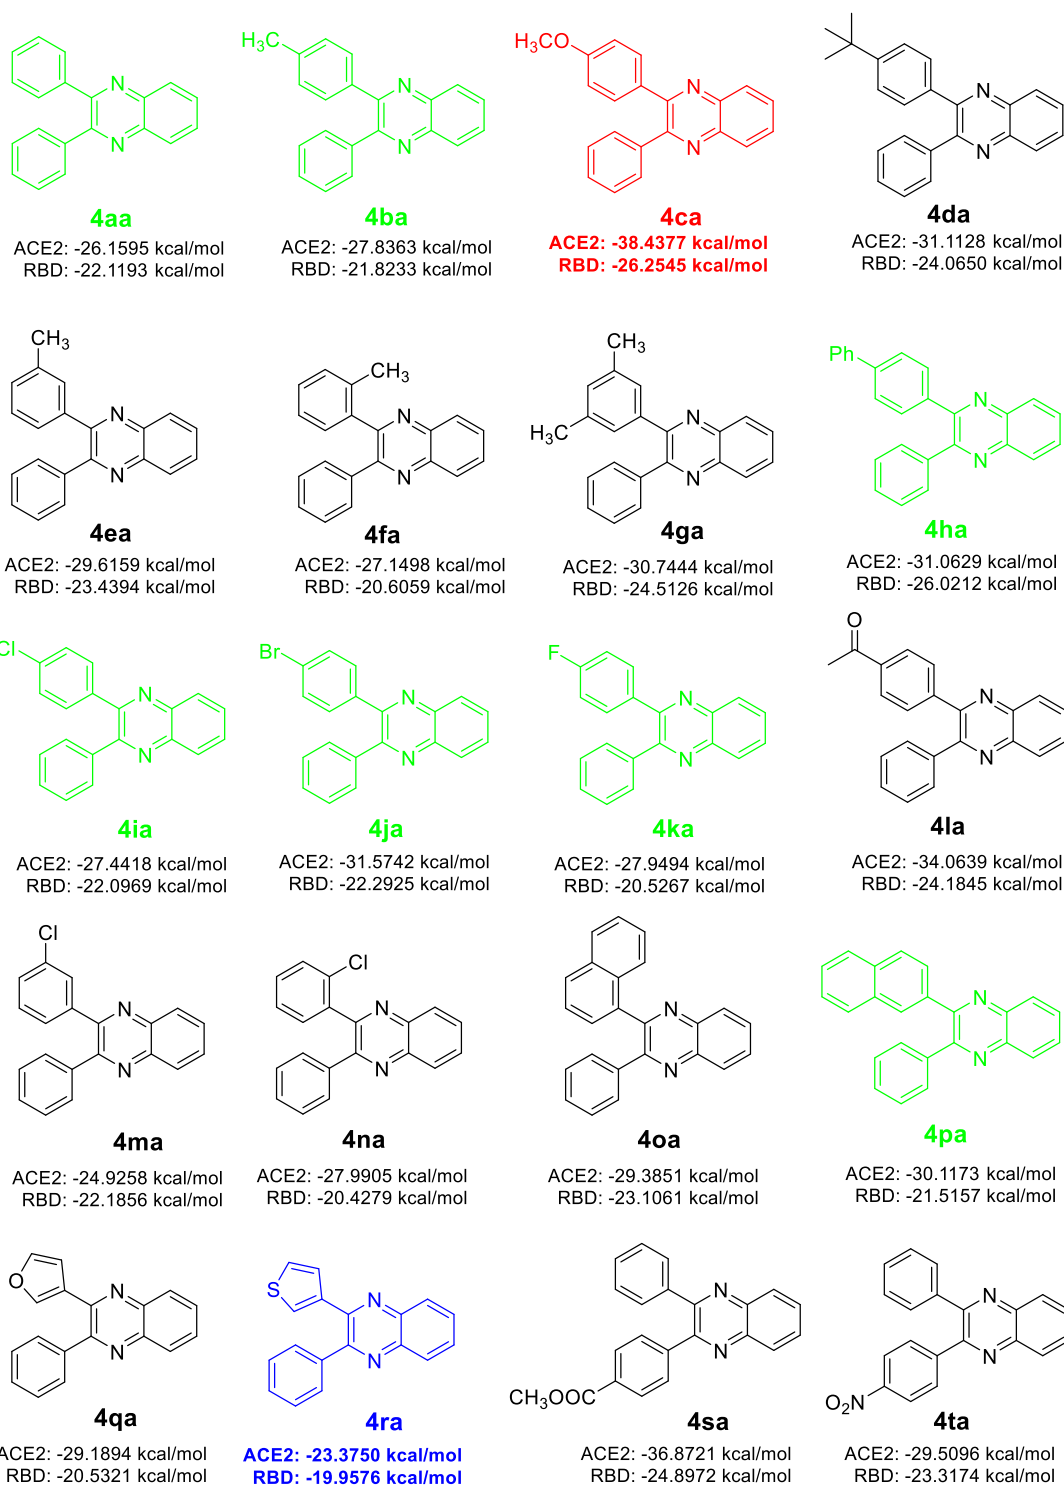

**Scheme S1** Twenty quinoxalines from diketones **2a** - **2t** with calculated binding energy with both human ACE2 and SARS-CoV-2 spike RBD proteins by molecular docking study. Quinoxalines **4ca** (in red) has the lowest binding energy with both ACE2 and Spike RBD proteins, while **4ra** (in blue) has the highest binding energy with both proteins among all 20 quinoxalines. Nine quinoxalines **4aa**-

**4ca**, **4ha**, **4ia-4ka**, **4pa** and **4ra** were selected as representatives to be synthesized for subsequent antiviral entry evaluation against SARS-CoV-2 pseudovirus.

**Table S1** Calculated binding energy (kcal/ mol) of twenty quinoxalines with human ACE2 and SARS-CoV-2 spike RBD proteins by molecular docking study

| Quinoxalines | ACE2            | Spike RBD       |
|--------------|-----------------|-----------------|
| <b>4aa</b>   | -26.1595        | -22.1193        |
| <b>4ba</b>   | -27.8363        | -21.8233        |
| <b>4ca</b>   | <b>-38.4377</b> | <b>-26.2545</b> |
| <b>4da</b>   | -31.1128        | -24.065         |
| <b>4ea</b>   | -29.6159        | -23.4394        |
| <b>4fa</b>   | -27.1498        | -20.6059        |
| <b>4ga</b>   | -30.7444        | -24.5126        |
| <b>4ha</b>   | -31.0629        | -26.0212        |
| <b>4ia</b>   | -27.4418        | -22.0969        |
| <b>4ja</b>   | <b>-31.5742</b> | <b>-22.2925</b> |
| <b>4ka</b>   | <b>-27.9494</b> | <b>-20.5267</b> |
| <b>4la</b>   | -34.0639        | -24.1845        |
| <b>4ma</b>   | -24.9258        | -22.1856        |
| <b>4na</b>   | -27.9905        | -20.4279        |
| <b>4oa</b>   | -29.3851        | -23.1061        |
| <b>4pa</b>   | -30.1173        | -21.5157        |
| <b>4qa</b>   | -29.1894        | -20.5321        |
| <b>4ra</b>   | <b>-23.375</b>  | <b>-19.9576</b> |
| <b>4sa</b>   | -36.8721        | -24.8972        |
| <b>4ta</b>   | -29.5096        | -23.3174        |

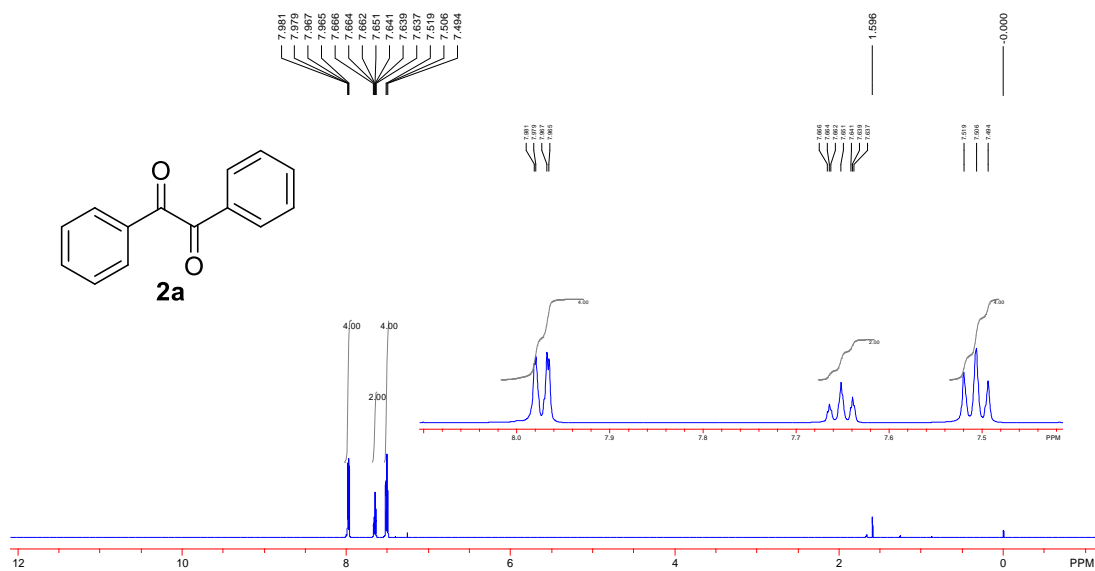

Supplementary Figure 1. <sup>1</sup>H-NMR spectrum of Compound **2a** in CDCl<sub>3</sub>

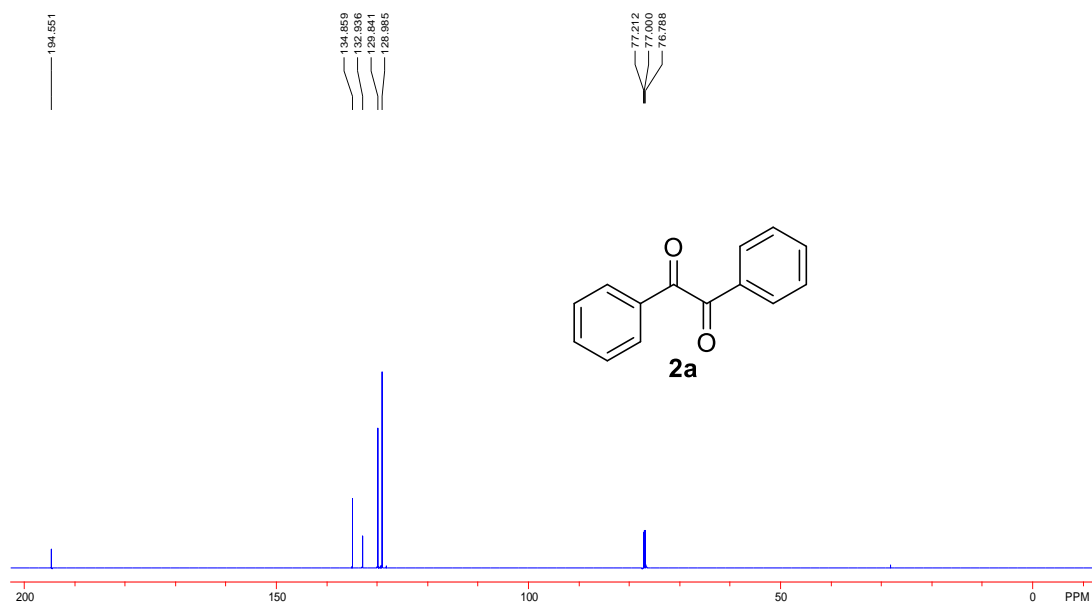

Supplementary Figure 2. <sup>13</sup>C-NMR spectrum of Compound **2a** in CDCl<sub>3</sub>

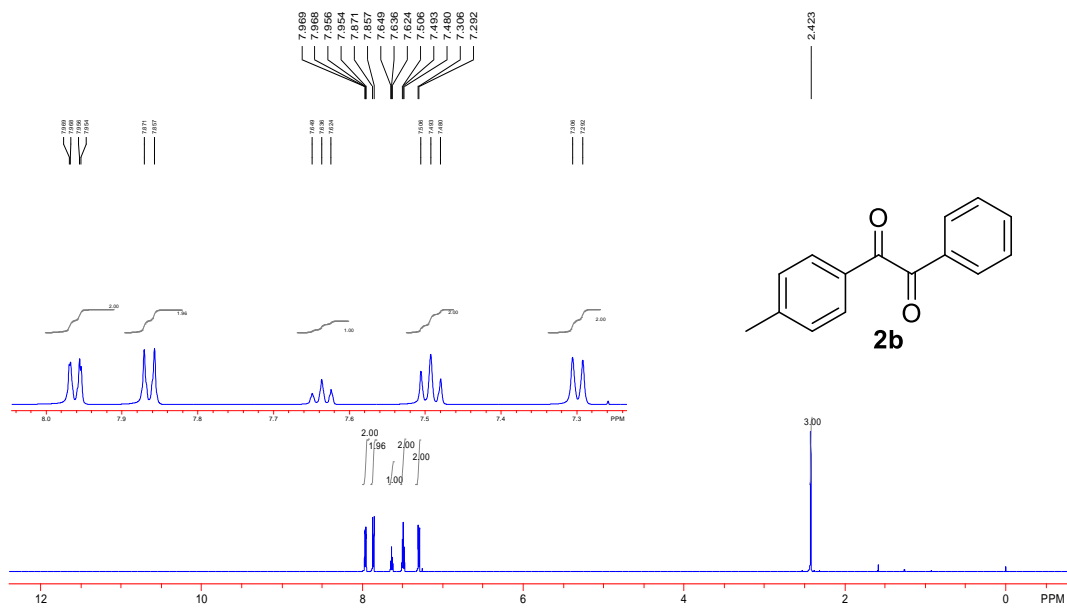

Supplementary Figure 3. <sup>1</sup>H-NMR spectrum of Compound **2b** in CDCl<sub>3</sub>

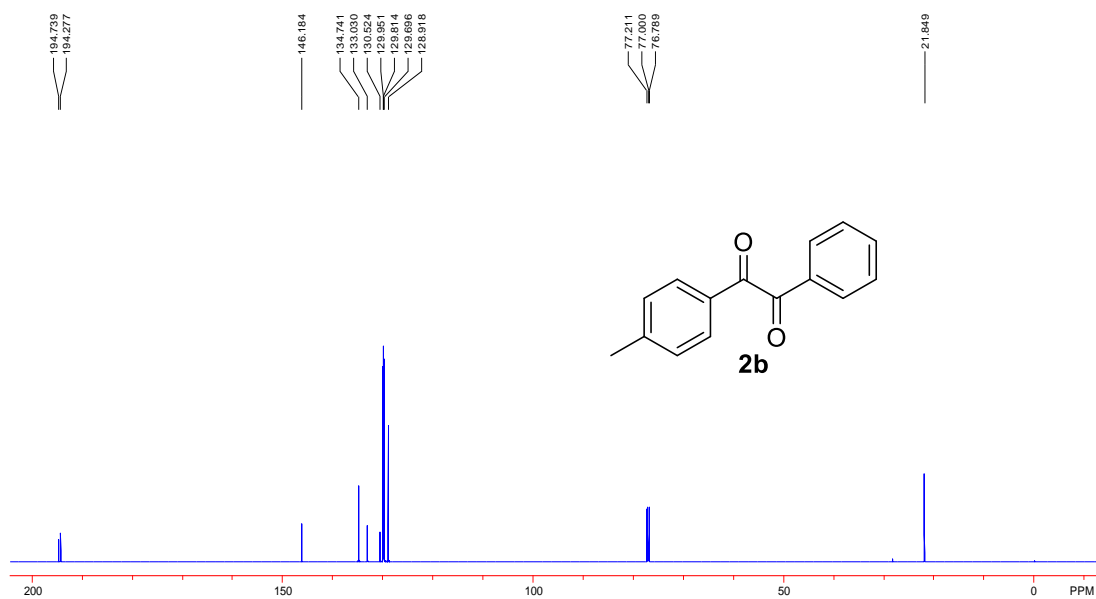

Supplementary Figure 4. <sup>13</sup>C-NMR spectrum of Compound **2b** in CDCl<sub>3</sub>

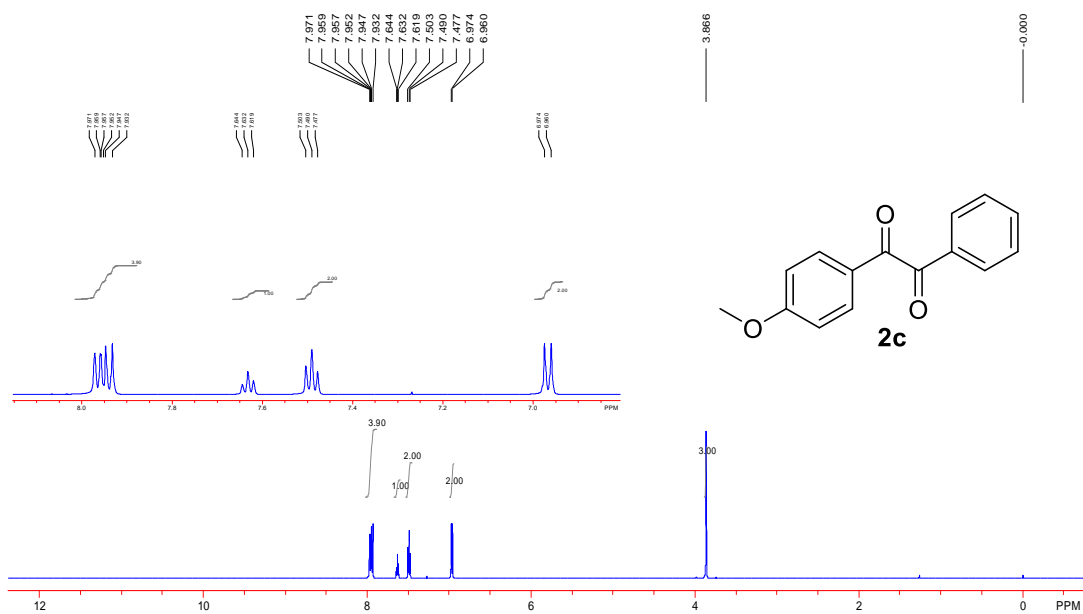

Supplementary Figure 5. <sup>1</sup>H-NMR spectrum of Compound 2c in CDCl<sub>3</sub>

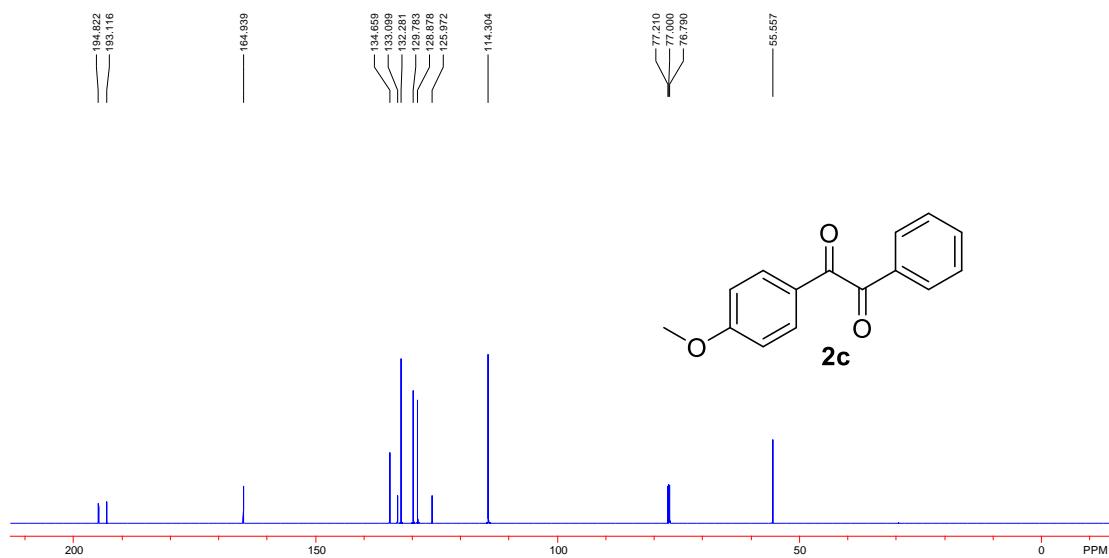

Supplementary Figure 6. <sup>13</sup>C-NMR spectrum of Compound 2c in CDCl<sub>3</sub>

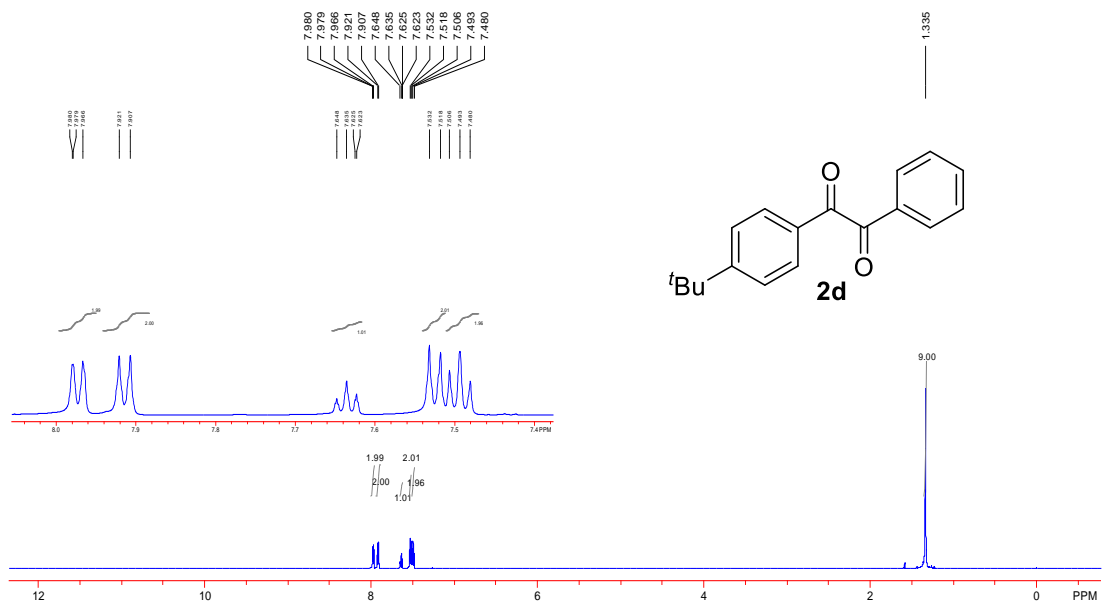

Supplementary Figure 7. <sup>1</sup>H-NMR spectrum of Compound **2d** in CDCl<sub>3</sub>

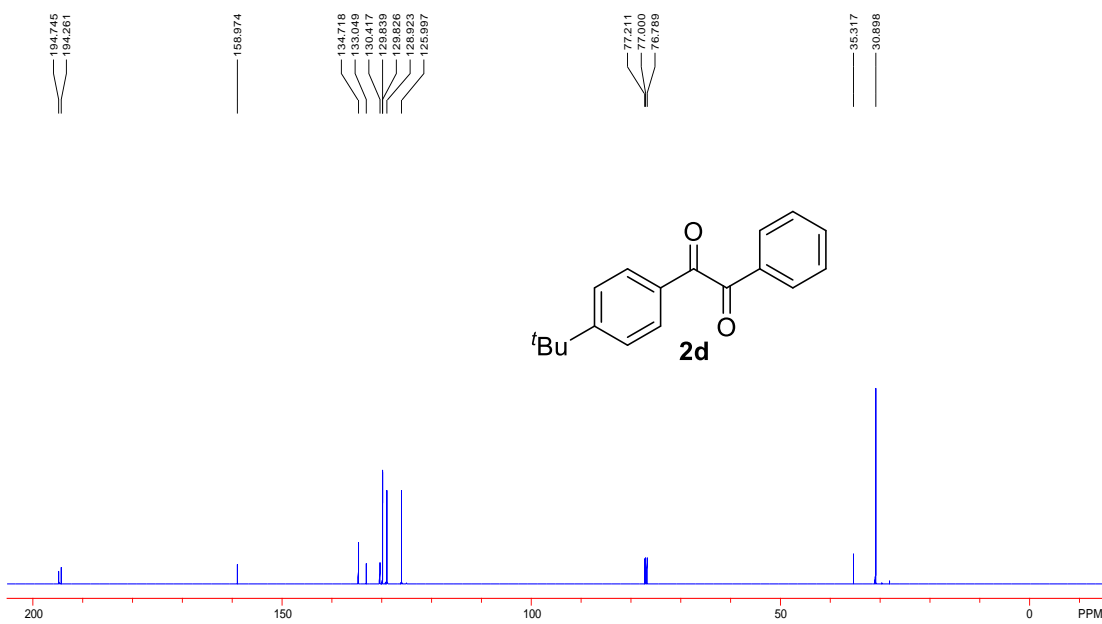

Supplementary Figure 8. <sup>13</sup>C-NMR spectrum of Compound **2d** in CDCl<sub>3</sub>

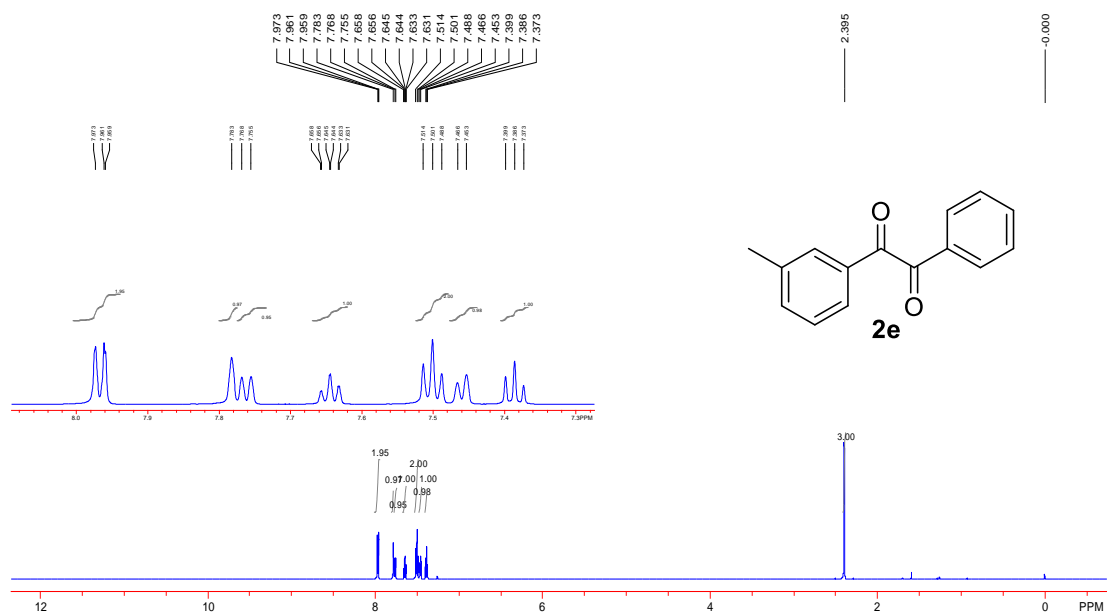

**Supplementary Figure 9.** <sup>1</sup>H-NMR spectrum of Compound 2e in CDCl<sub>3</sub>

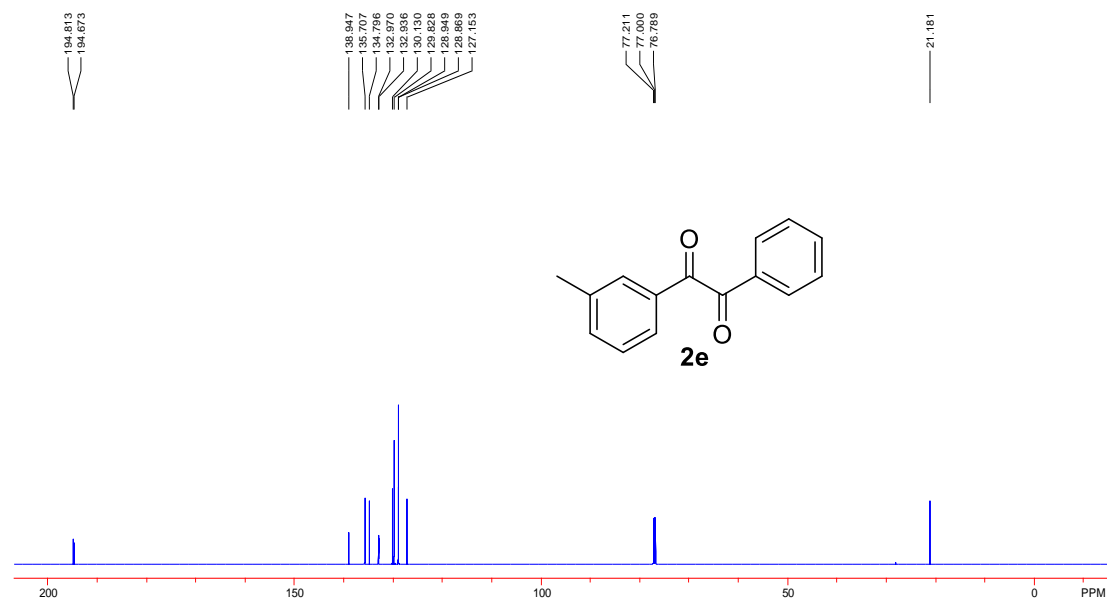

**Supplementary Figure 20.** <sup>13</sup>C-NMR spectrum of Compound 2e in CDCl<sub>3</sub>



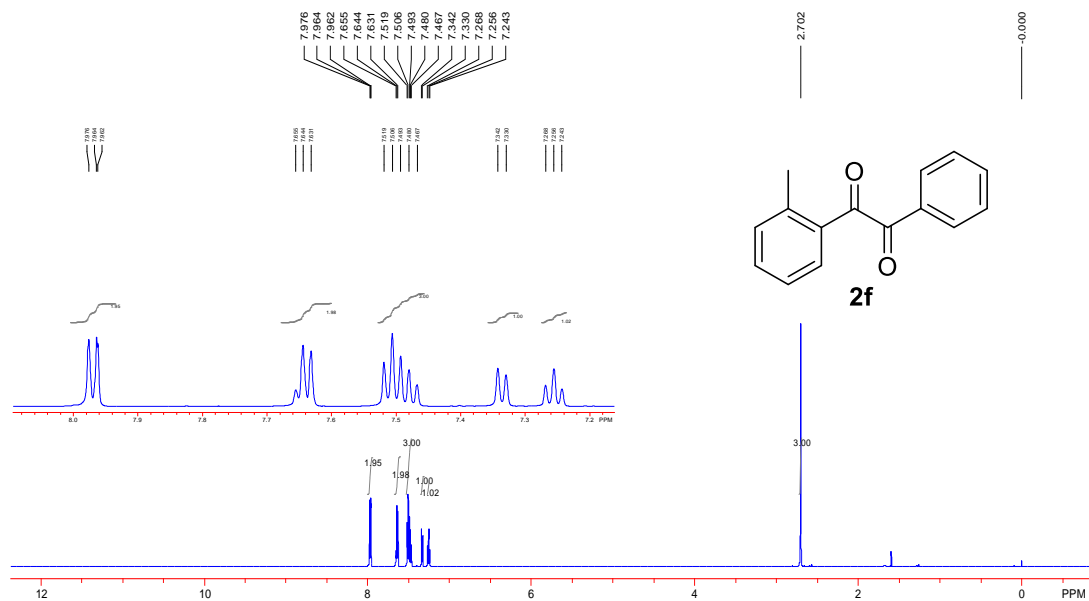

Supplementary Figure 31. <sup>1</sup>H-NMR spectrum of Compound **2f** in CDCl<sub>3</sub>

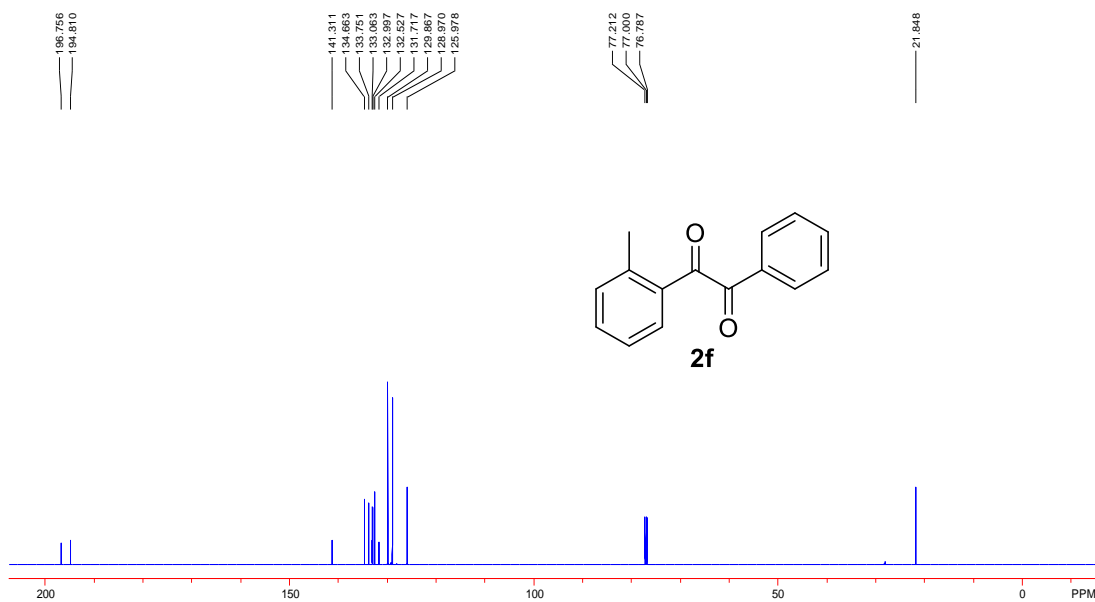

Supplementary Figure 42. <sup>13</sup>C-NMR spectrum of Compound **2f** in CDCl<sub>3</sub>

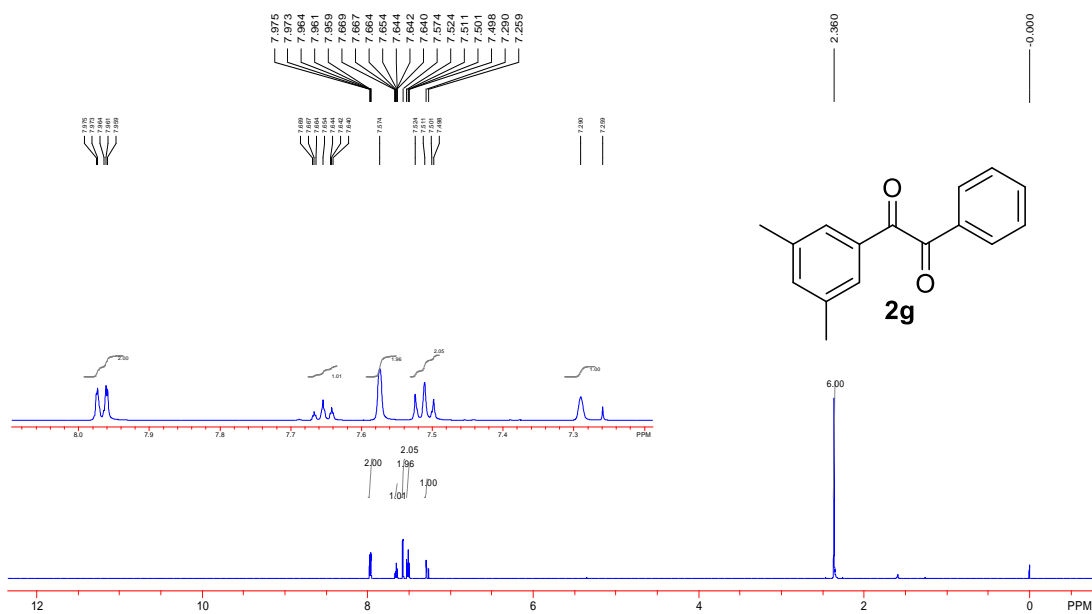

Supplementary Figure 53. <sup>1</sup>H-NMR spectrum of Compound **2g** in CDCl<sub>3</sub>

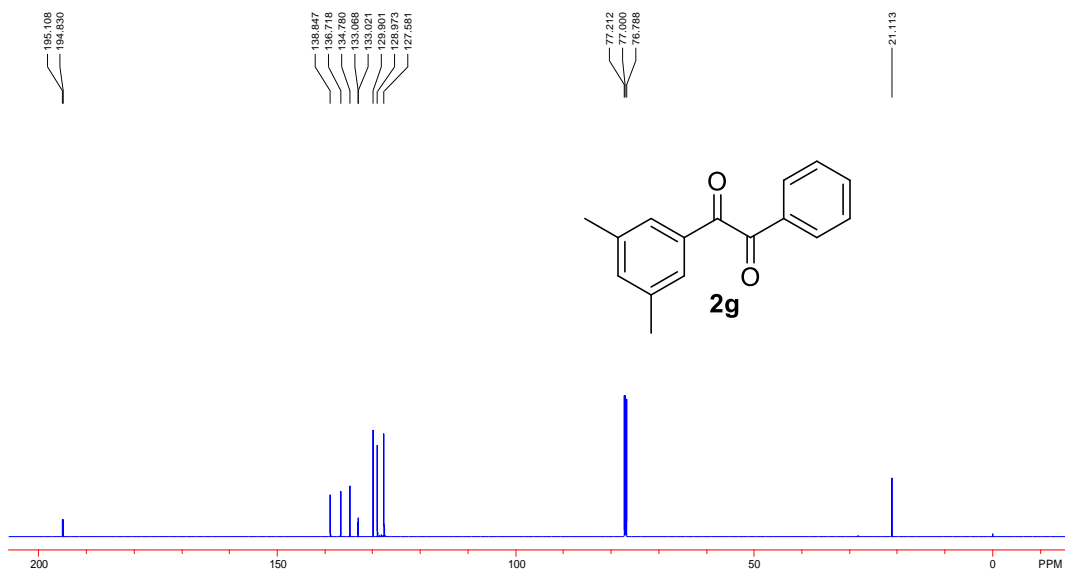

Supplementary Figure 64. <sup>13</sup>C-NMR spectrum of Compound **2g** in CDCl<sub>3</sub>

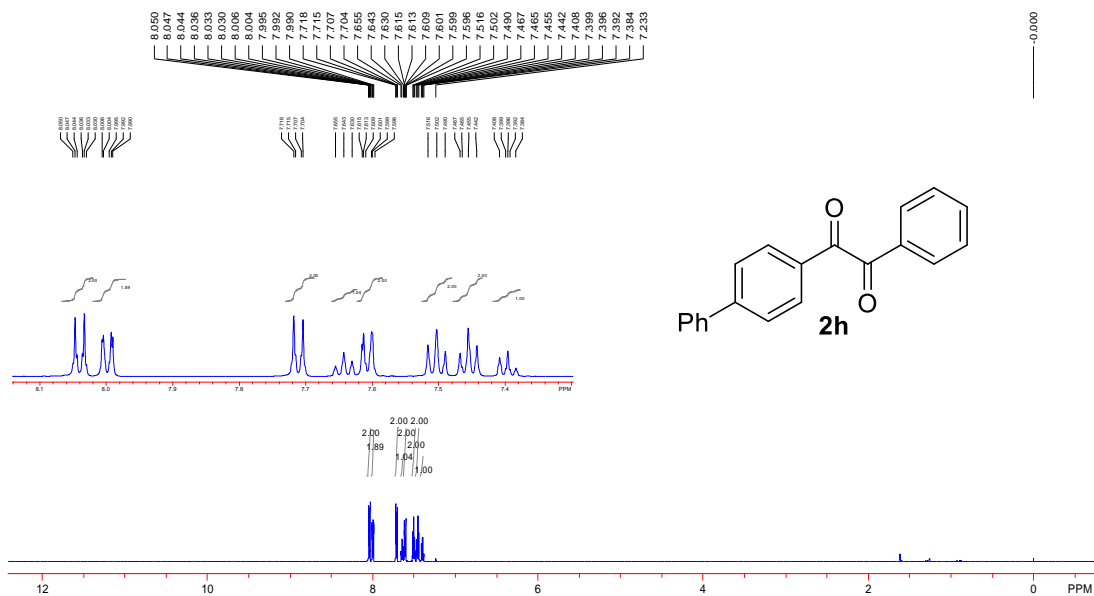

Supplementary Figure 75. <sup>1</sup>H-NMR spectrum of Compound 2h in CDCl<sub>3</sub>

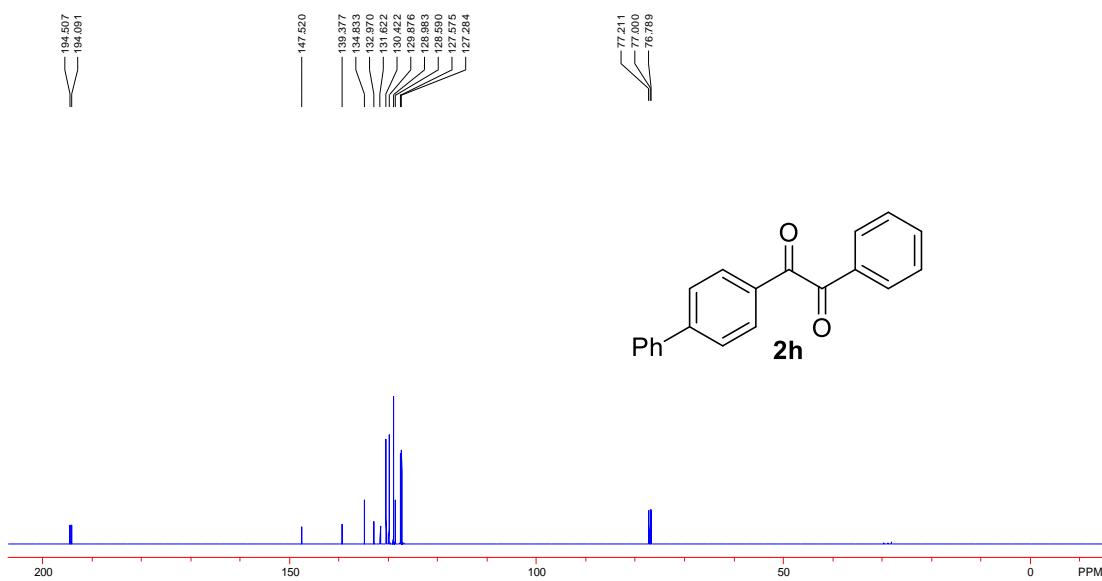

Supplementary Figure 86. <sup>13</sup>C-NMR spectrum of Compound 2h in CDCl<sub>3</sub>

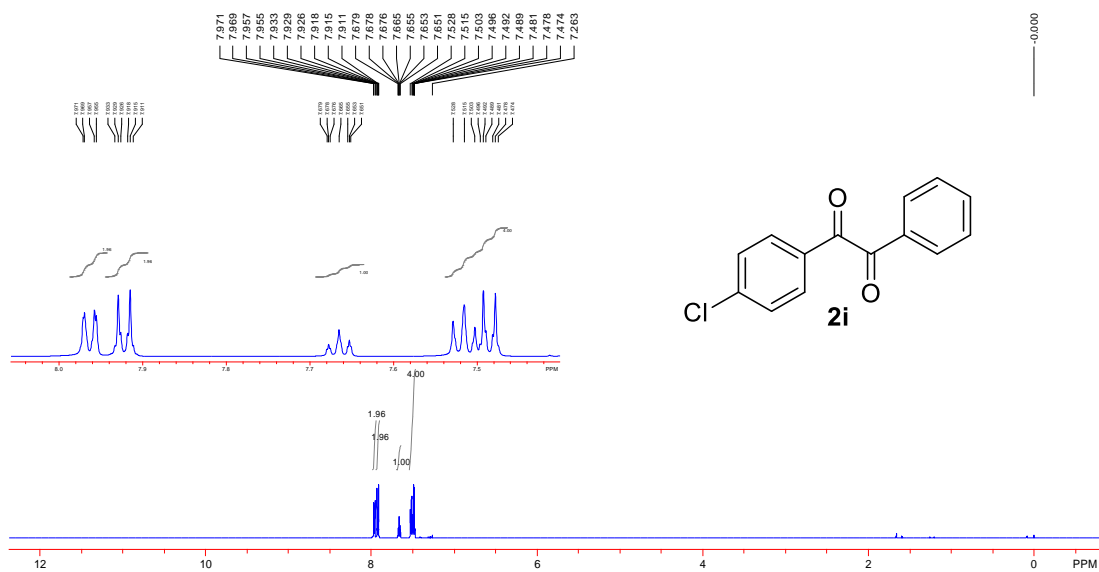

Supplementary Figure 97. <sup>1</sup>H-NMR spectrum of Compound **2i** in CDCl<sub>3</sub>

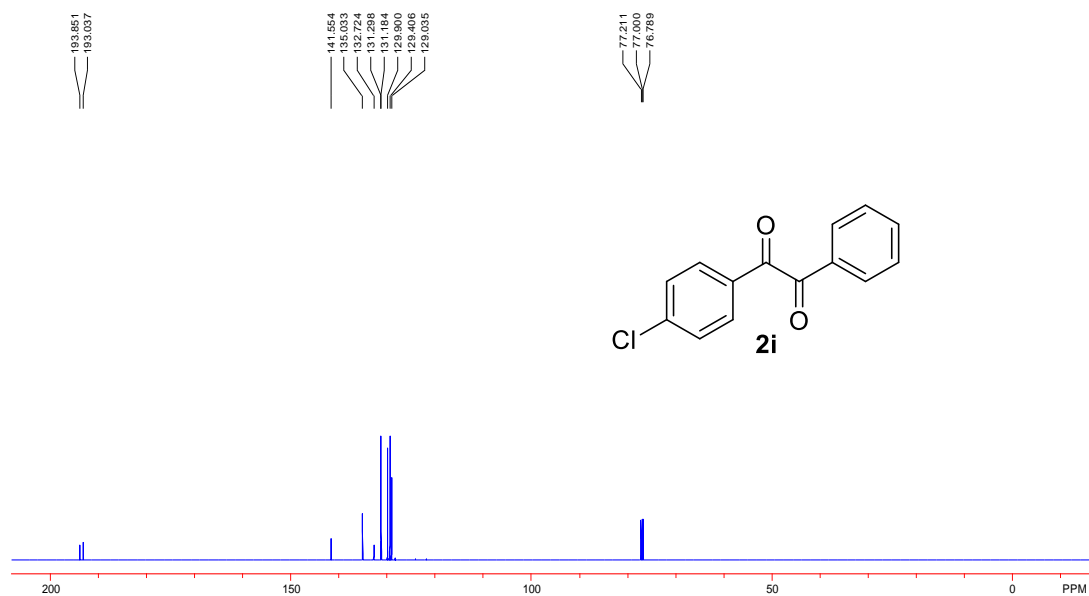

Supplementary Figure 108. <sup>13</sup>C-NMR spectrum of Compound **2i** in CDCl<sub>3</sub>

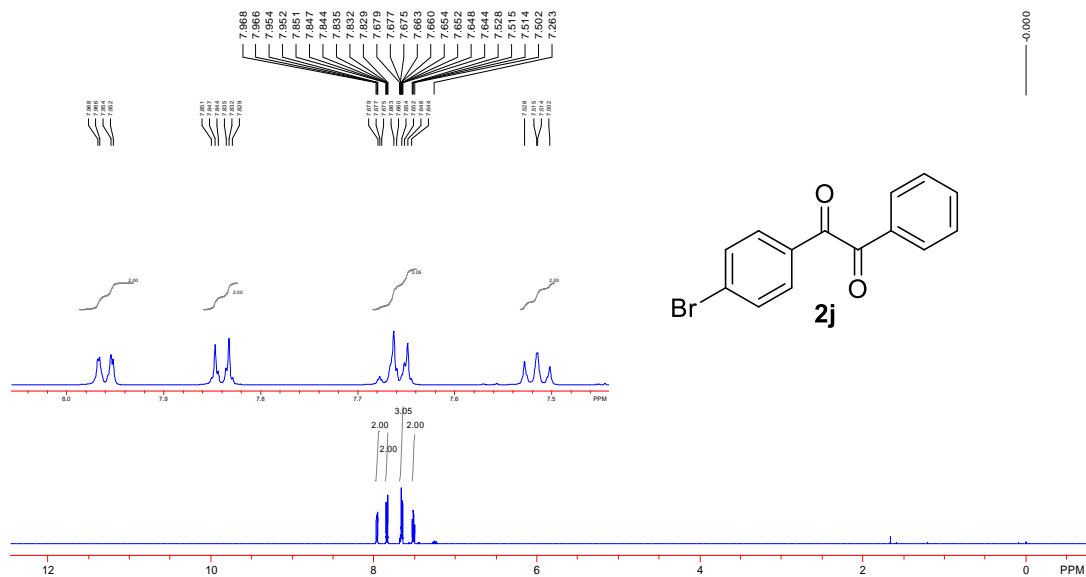

Supplementary Figure 119. <sup>1</sup>H-NMR spectrum of Compound **2j** in CDCl<sub>3</sub>

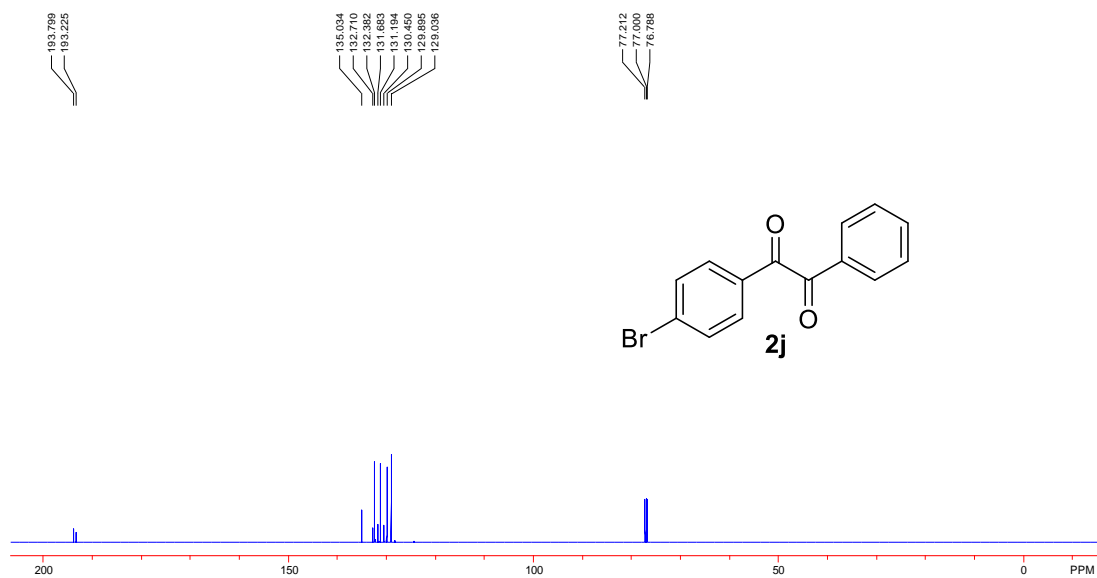

Supplementary Figure 20. <sup>13</sup>C-NMR spectrum of Compound **2j** in CDCl<sub>3</sub>

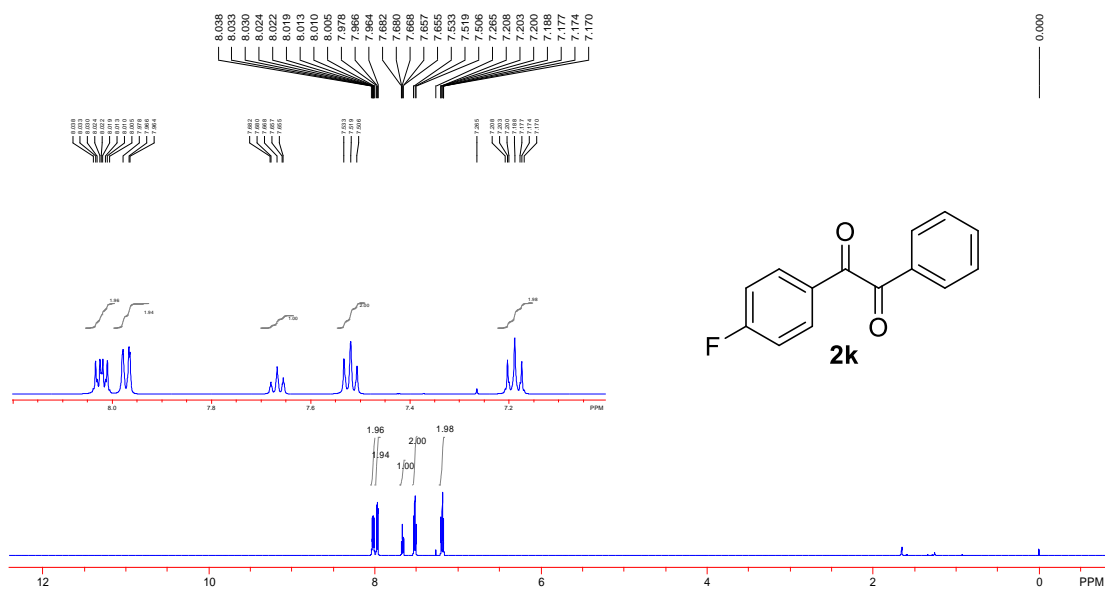

Supplementary Figure 21. <sup>1</sup>H-NMR spectrum of Compound **2k** in CDCl<sub>3</sub>

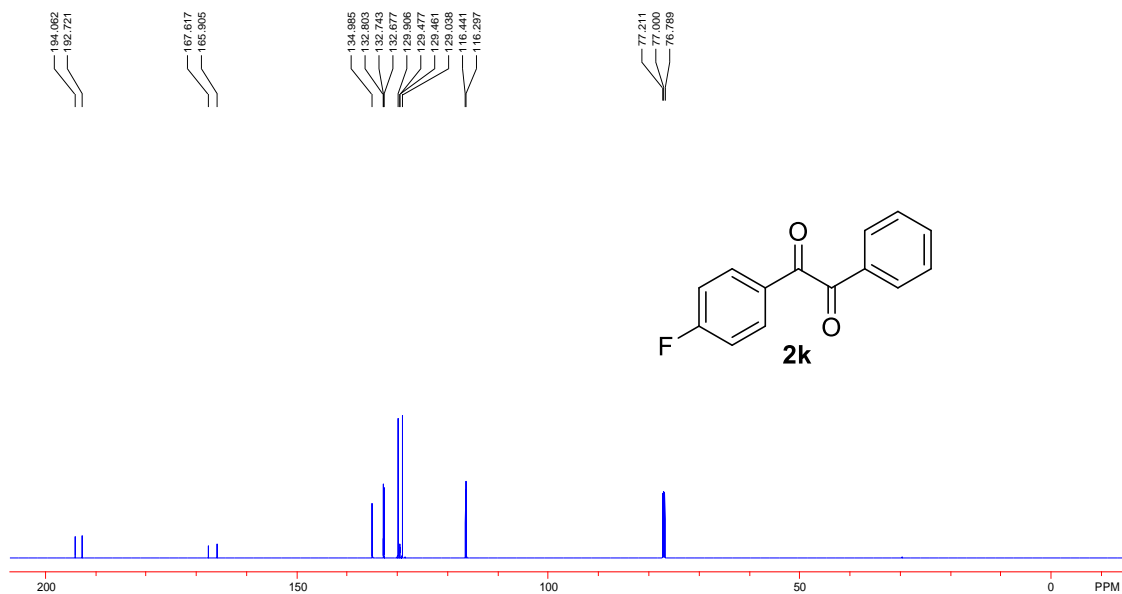

Supplementary Figure 22. <sup>13</sup>C-NMR spectrum of Compound **2k** in CDCl<sub>3</sub>

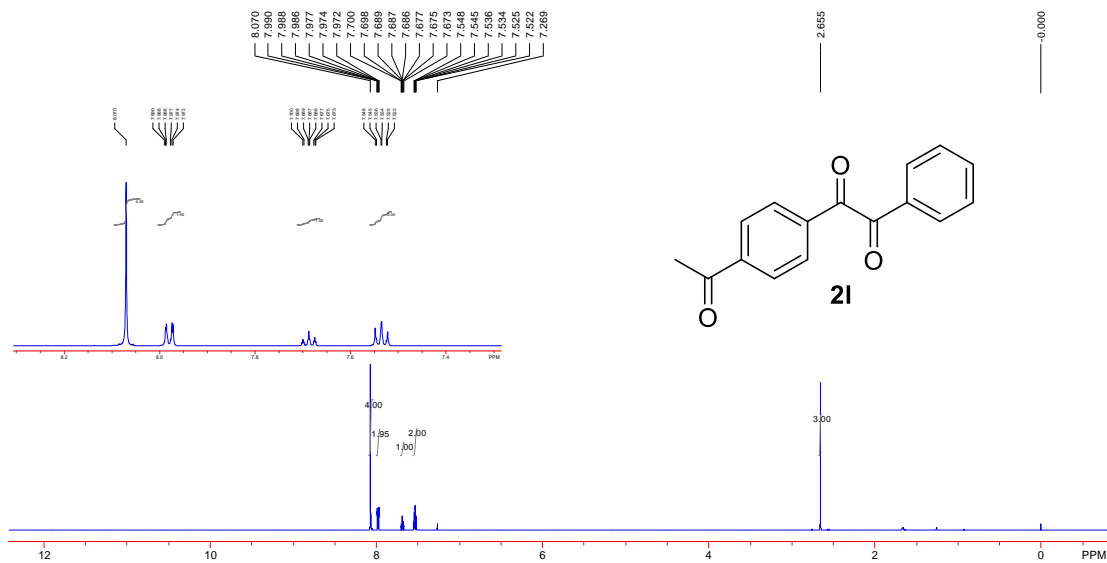

Supplementary Figure 23. <sup>1</sup>H-NMR spectrum of Compound **2I** in CDCl<sub>3</sub>

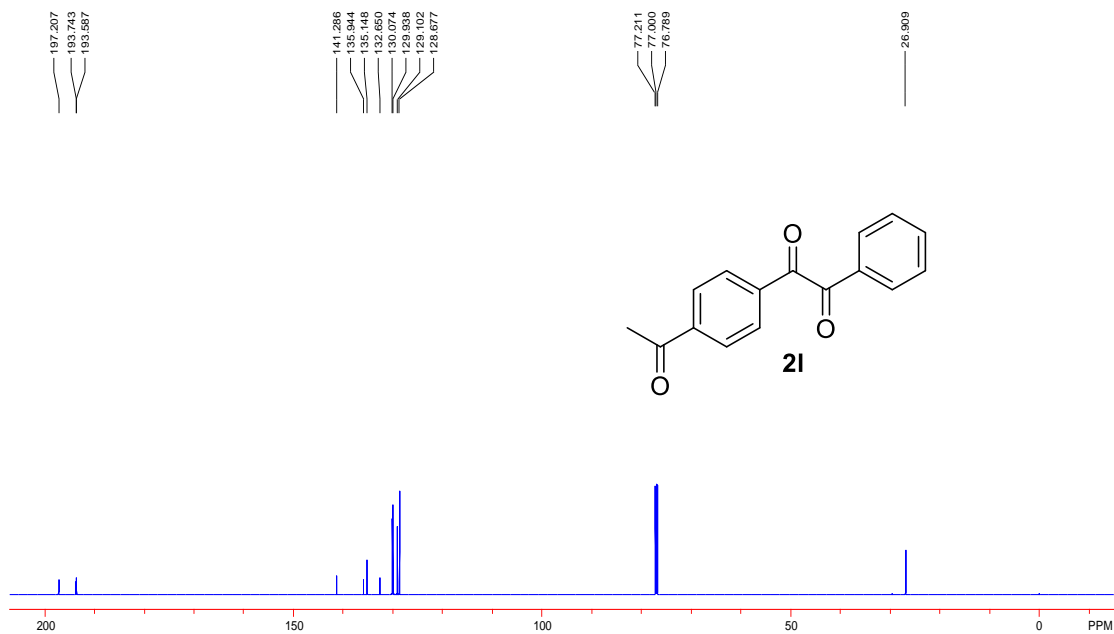

Supplementary Figure 24. <sup>13</sup>C-NMR spectrum of Compound **2I** in CDCl<sub>3</sub>

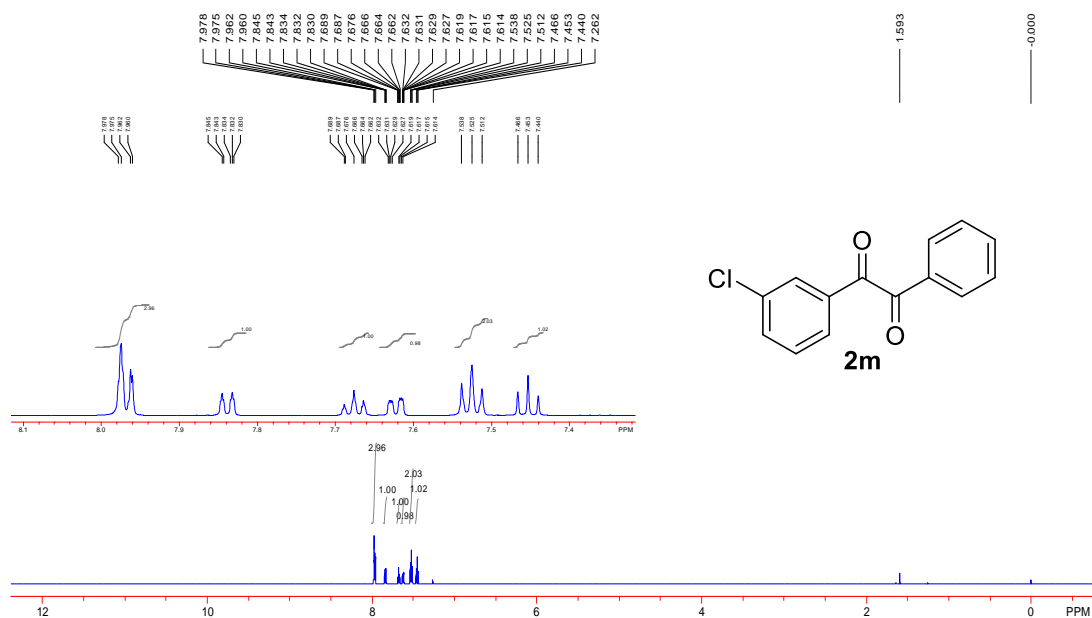

Supplementary Figure 25. <sup>1</sup>H-NMR spectrum of Compound **2m** in CDCl<sub>3</sub>

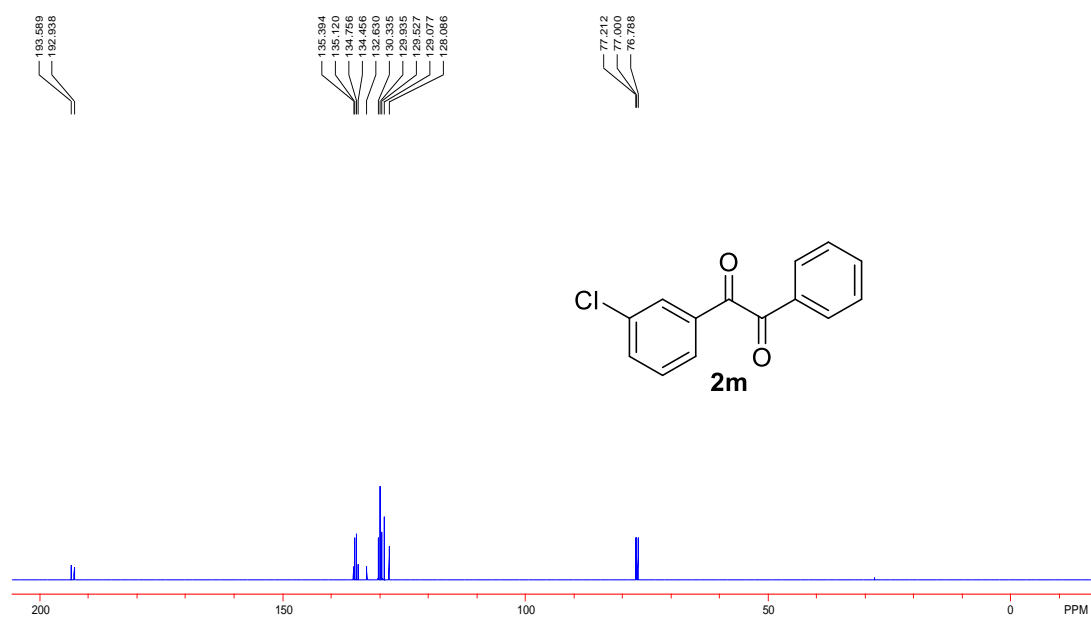

Supplementary Figure 26. <sup>13</sup>C-NMR spectrum of Compound **2m** in CDCl<sub>3</sub>



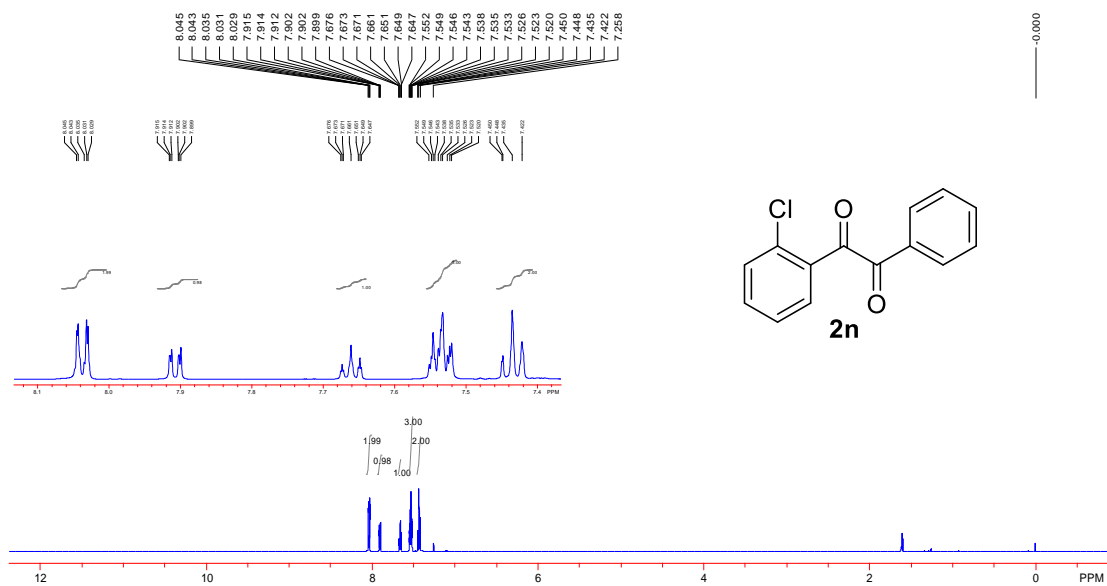

Supplementary Figure 27. <sup>1</sup>H-NMR spectrum of Compound **2n** in CDCl<sub>3</sub>

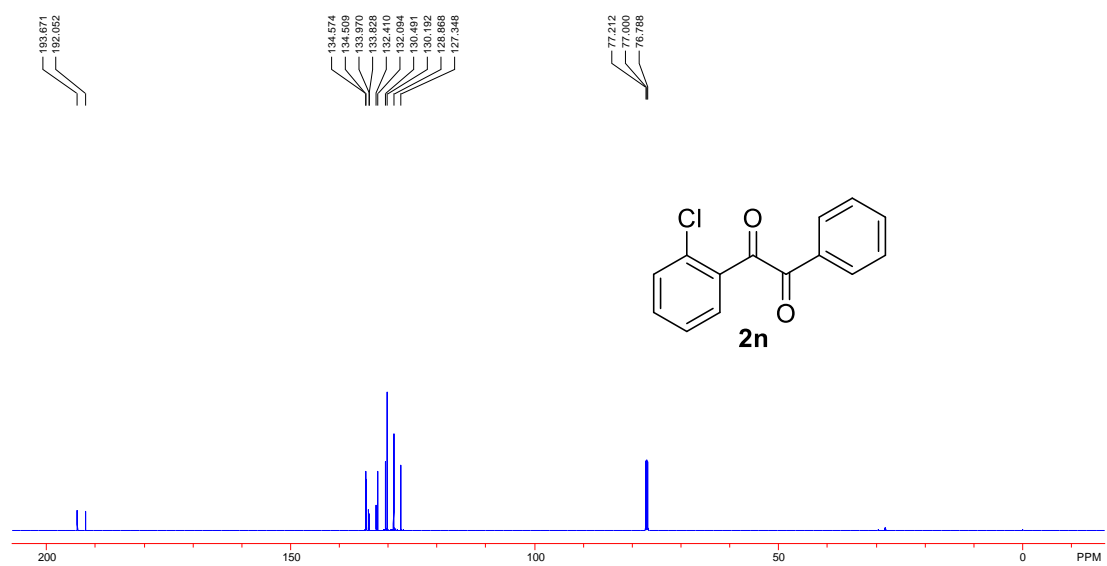

Supplementary Figure 28. <sup>13</sup>C-NMR spectrum of Compound **2n** in CDCl<sub>3</sub>

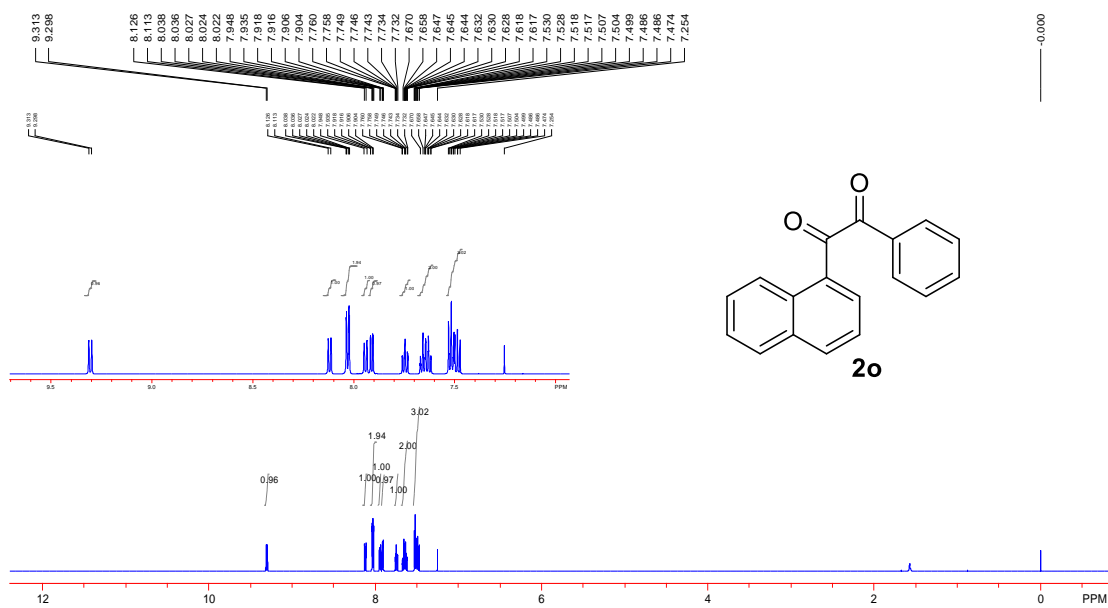

Supplementary Figure 29. <sup>1</sup>H-NMR spectrum of Compound 2o in CDCl<sub>3</sub>

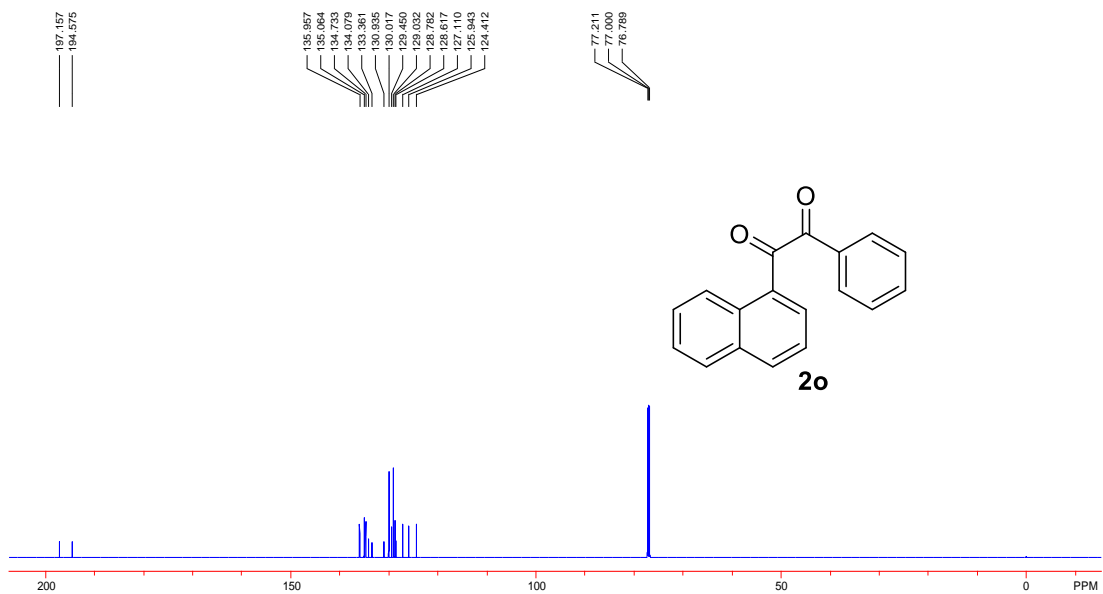

Supplementary Figure 30. <sup>13</sup>C-NMR spectrum of Compound 2o in CDCl<sub>3</sub>

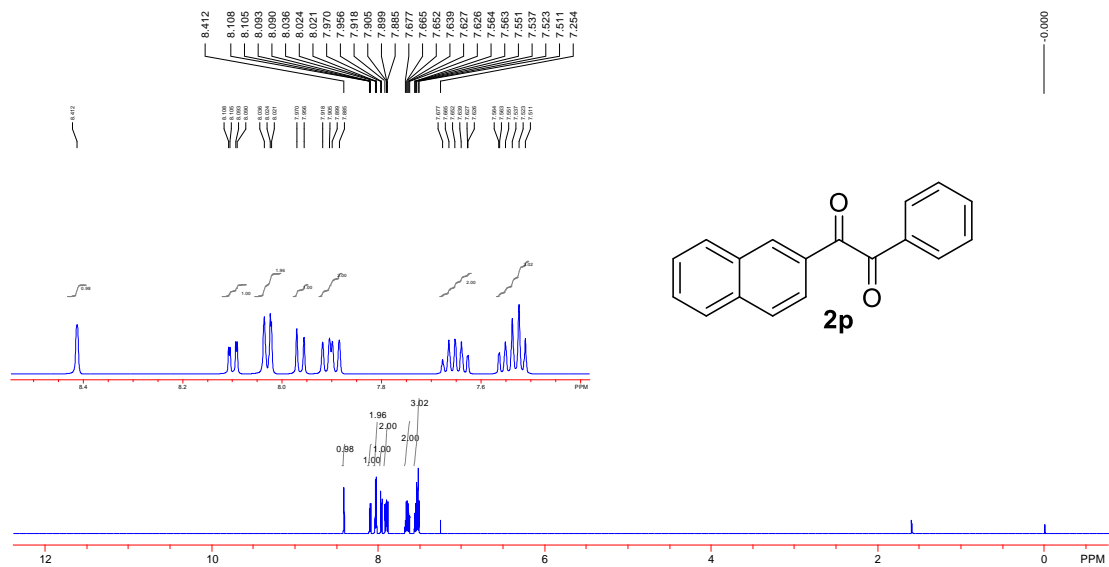

Supplementary Figure 31. <sup>1</sup>H-NMR spectrum of Compound **2p** in CDCl<sub>3</sub>

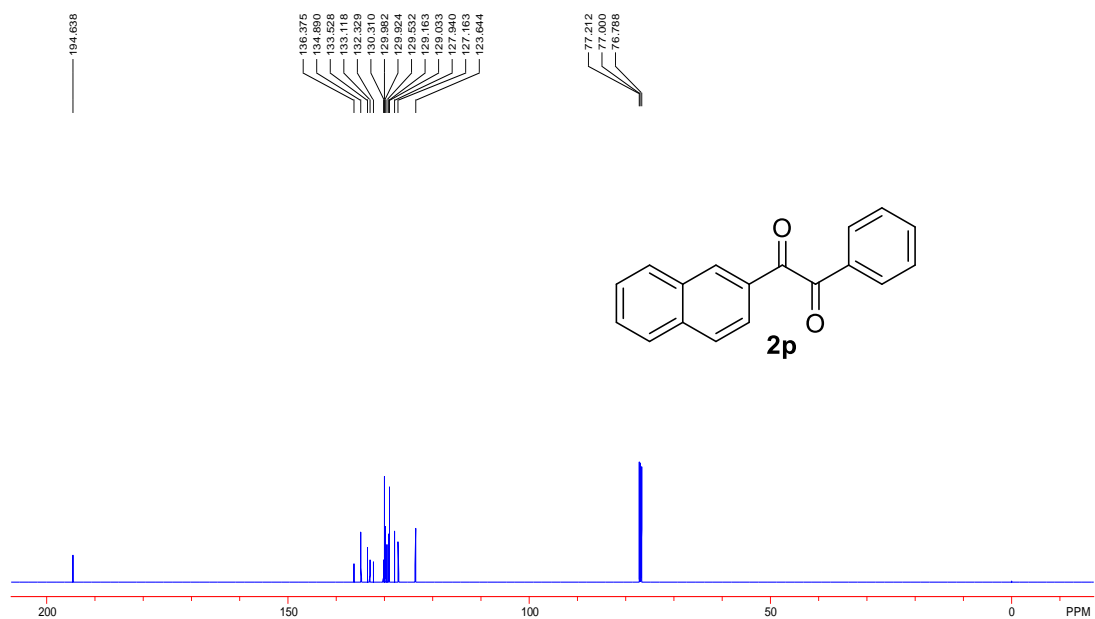

Supplementary Figure 32. <sup>13</sup>C-NMR spectrum of Compound **2p** in CDCl<sub>3</sub>

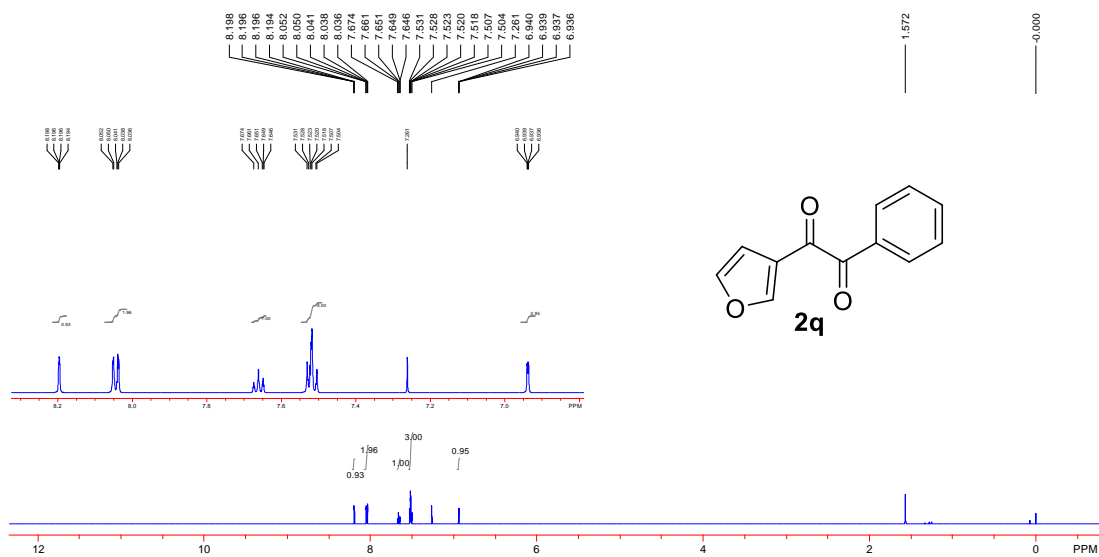

Supplementary Figure 33. <sup>1</sup>H-NMR spectrum of Compound **2q** in CDCl<sub>3</sub>

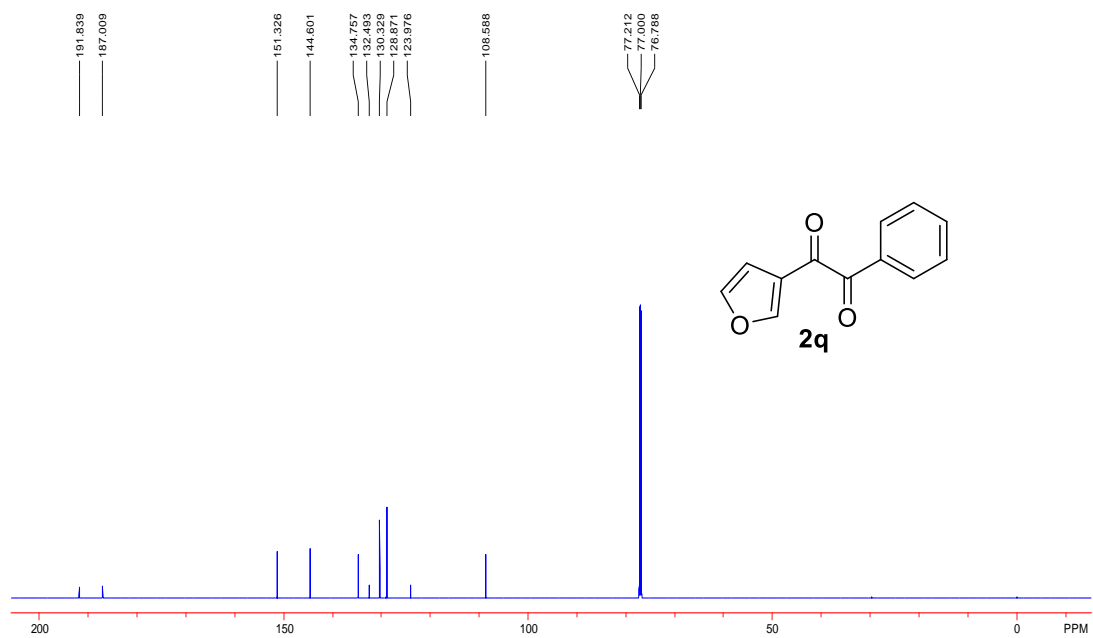

Supplementary Figure 34. <sup>13</sup>C-NMR spectrum of Compound **2q** in CDCl<sub>3</sub>

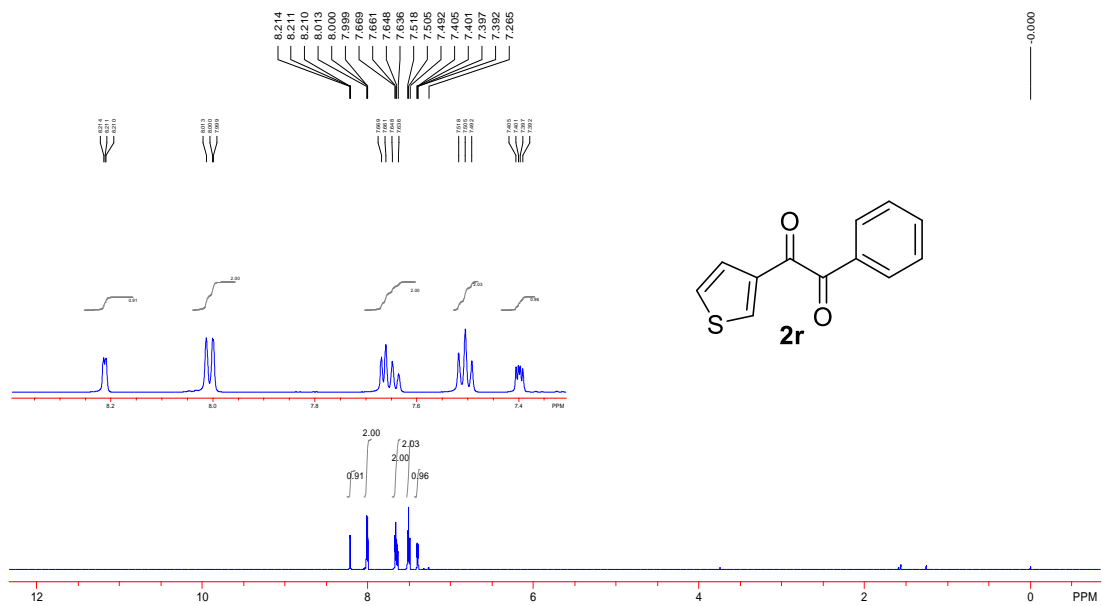

Supplementary Figure 35. <sup>1</sup>H-NMR spectrum of Compound **2r** in CDCl<sub>3</sub>

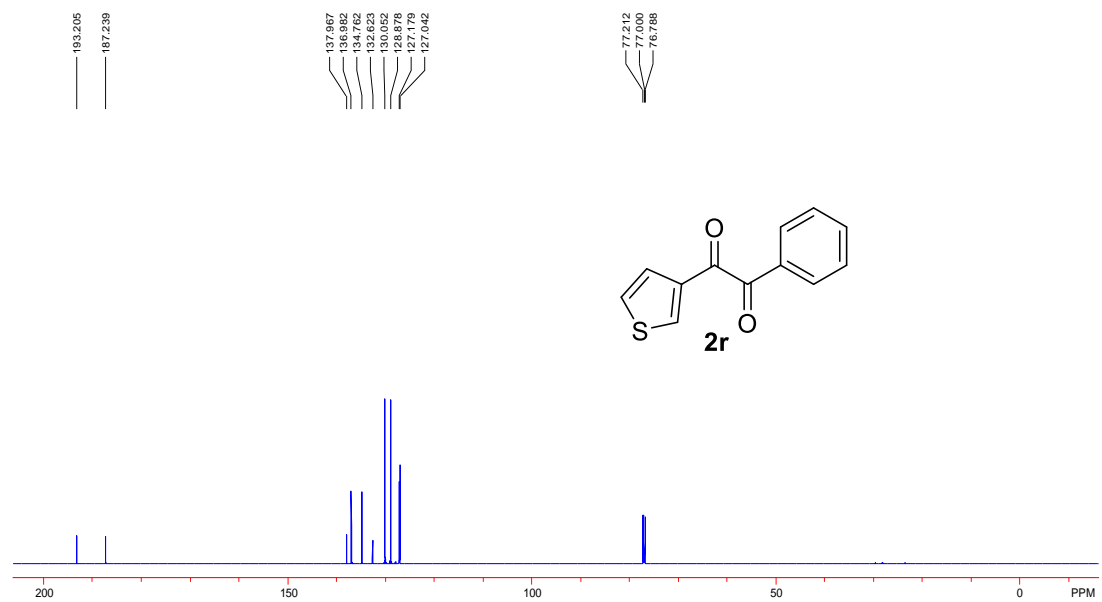

Supplementary Figure 36. <sup>13</sup>C-NMR spectrum of Compound **2r** in CDCl<sub>3</sub>

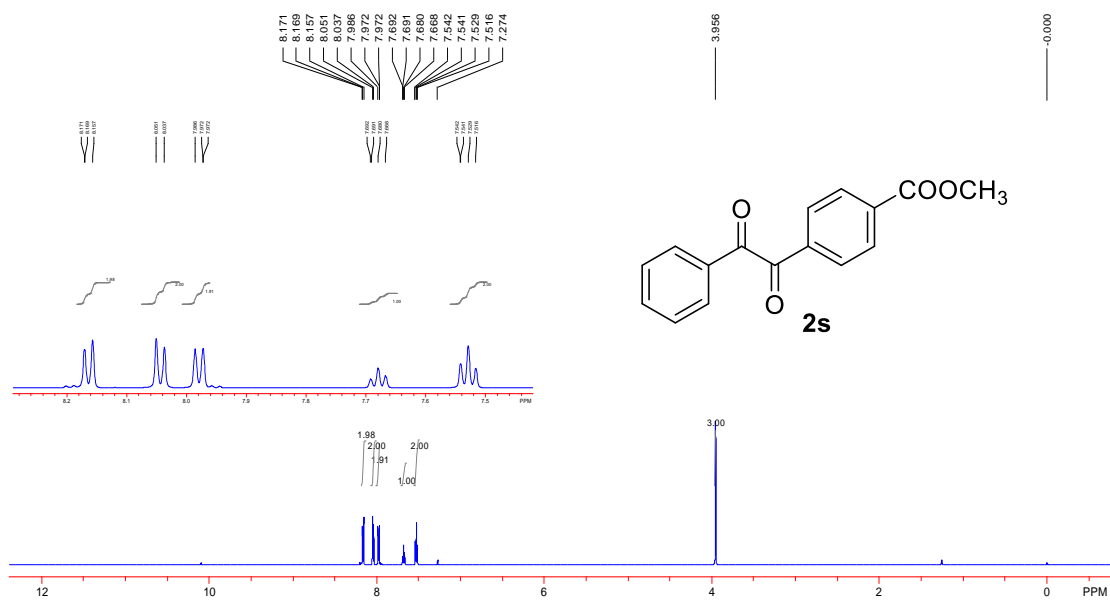

Supplementary Figure 37. <sup>1</sup>H-NMR spectrum of Compound **2s** in CDCl<sub>3</sub>

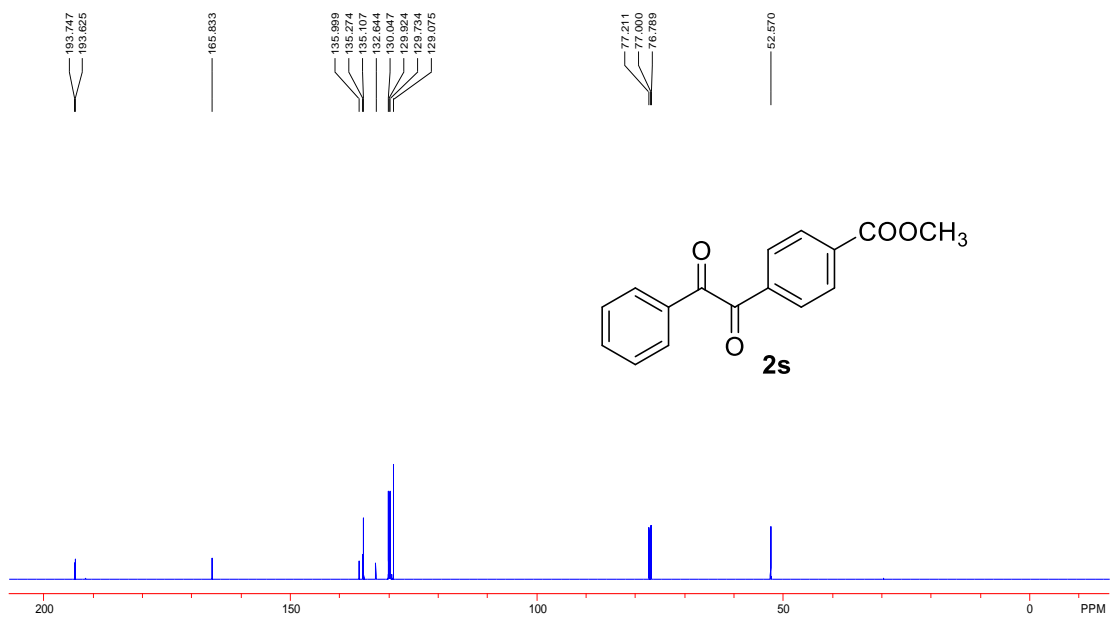

Supplementary Figure 38. <sup>13</sup>C-NMR spectrum of Compound **2s** in CDCl<sub>3</sub>

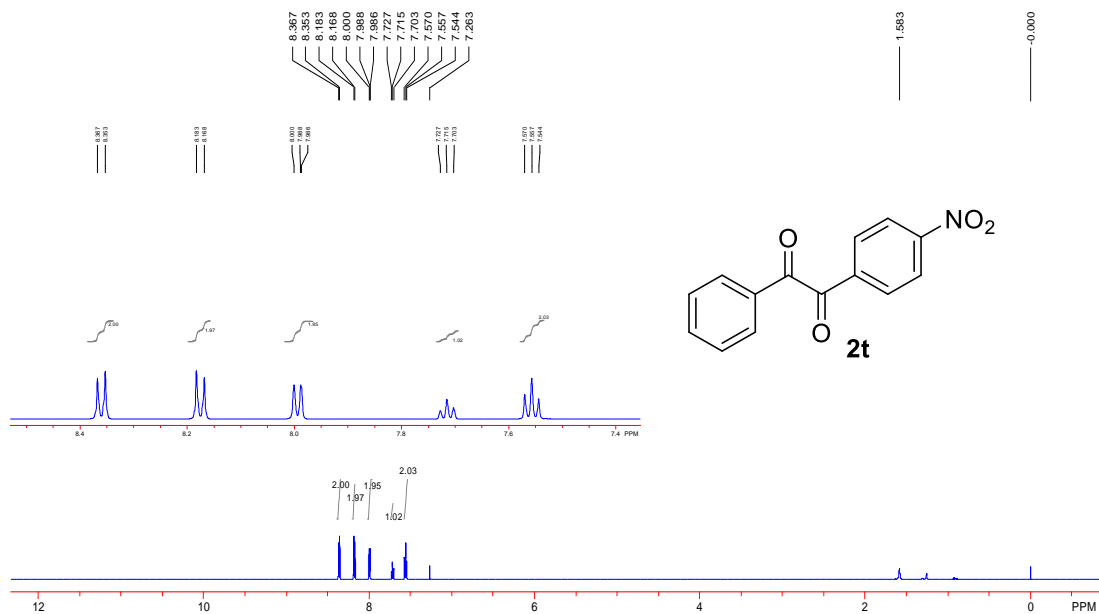

Supplementary Figure 39. <sup>1</sup>H-NMR spectrum of Compound **2t** in CDCl<sub>3</sub>

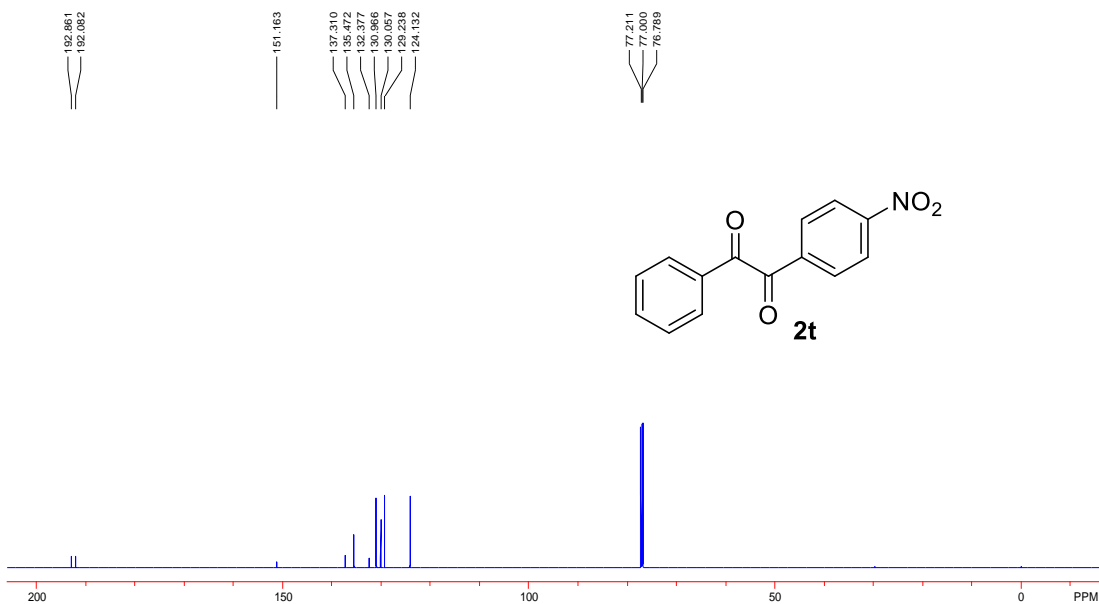

Supplementary Figure 40. <sup>13</sup>C-NMR spectrum of Compound **2t** in CDCl<sub>3</sub>

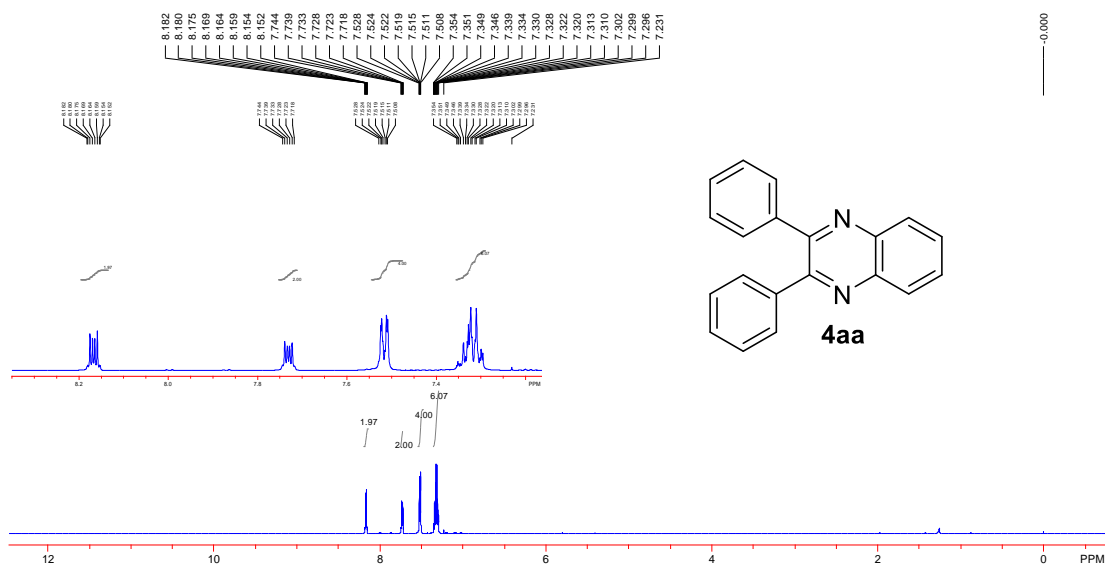

Supplementary Figure 41. <sup>1</sup>H-NMR spectrum of Compound **4aa** in CDCl<sub>3</sub>

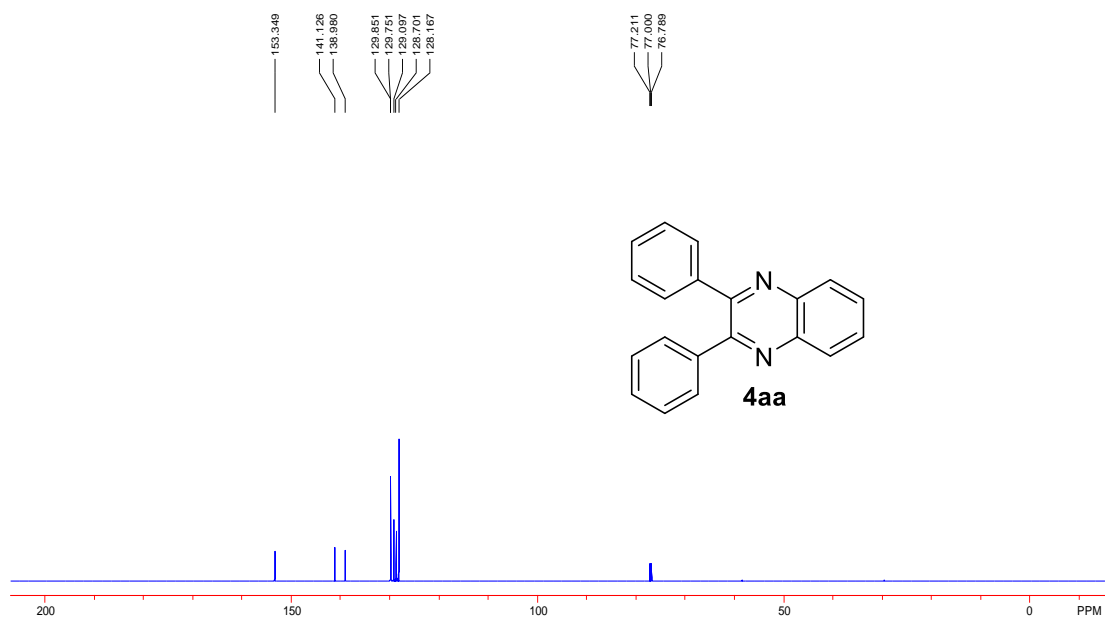

Supplementary Figure 42. <sup>13</sup>C-NMR spectrum of Compound **4aa** in CDCl<sub>3</sub>



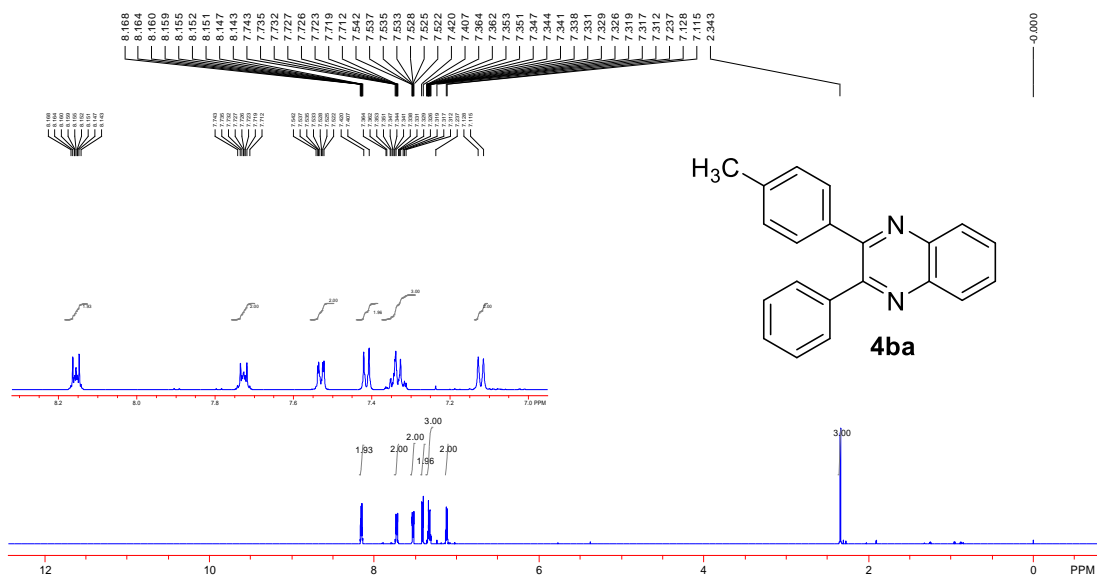

Supplementary Figure 43. <sup>1</sup>H-NMR spectrum of Compound **4ba** in CDCl<sub>3</sub>

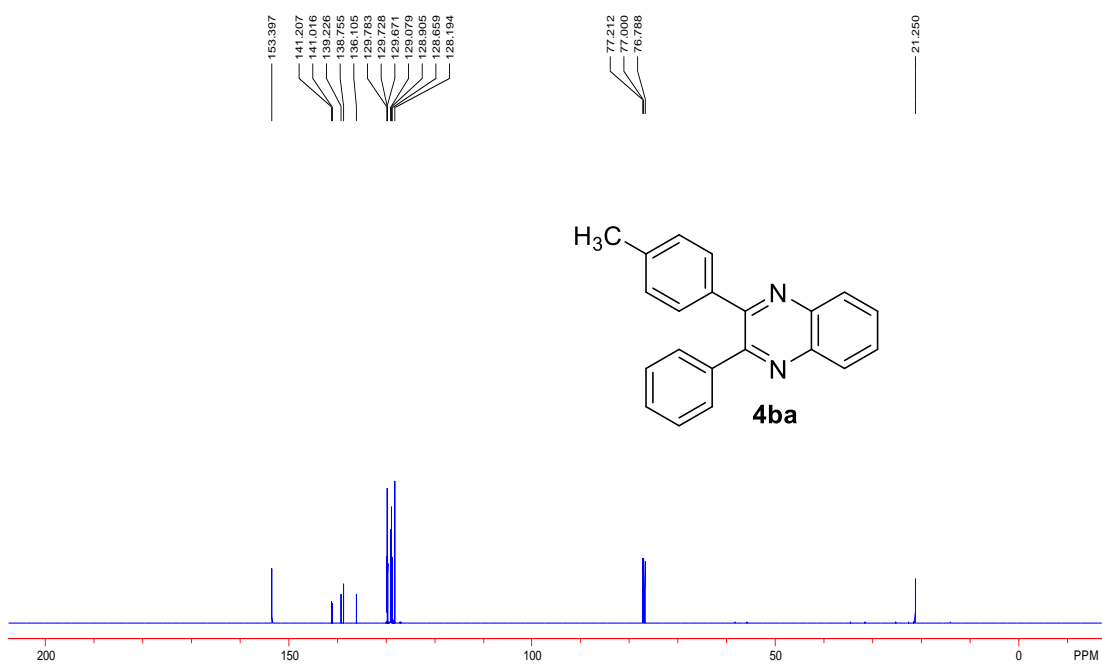

Supplementary Figure 44. <sup>13</sup>C-NMR spectrum of Compound **4ba** in CDCl<sub>3</sub>

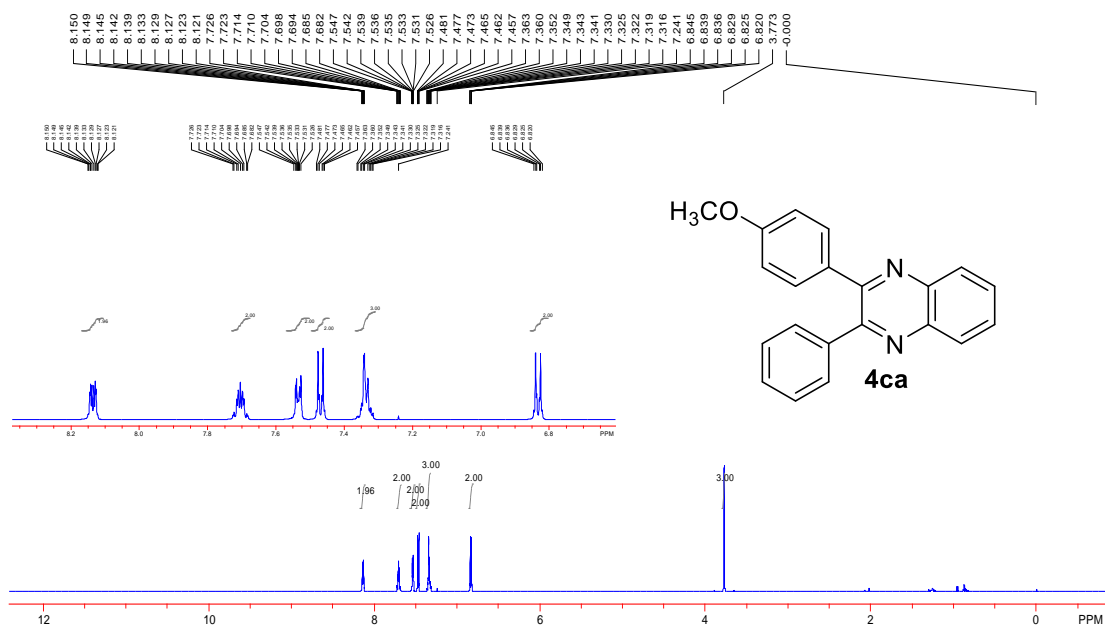

Supplementary Figure 45. <sup>1</sup>H-NMR spectrum of Compound **4ca** in CDCl<sub>3</sub>

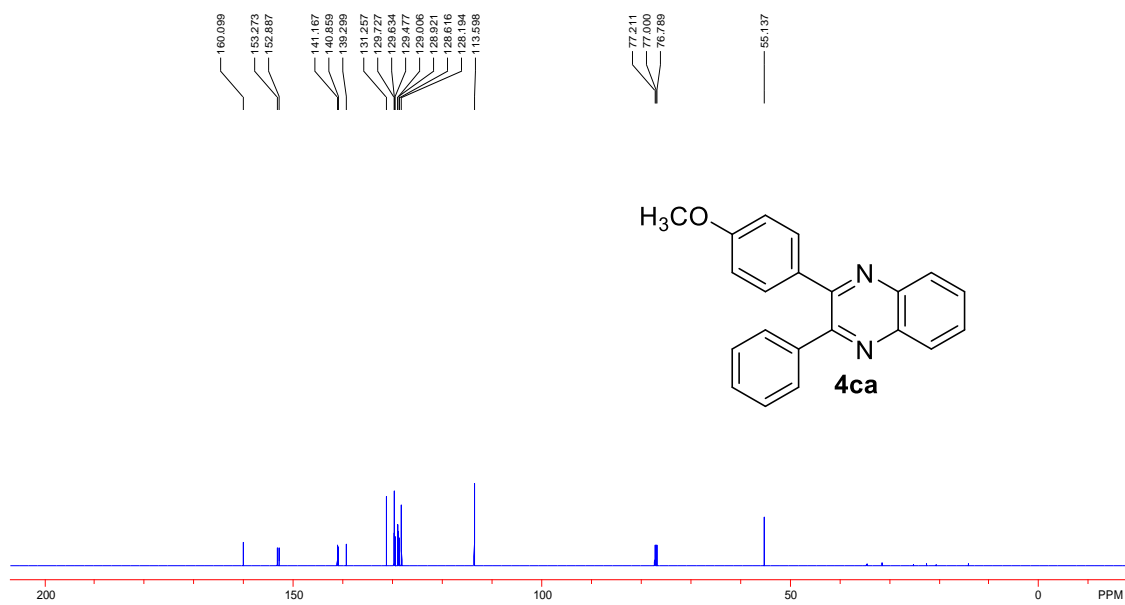

Supplementary Figure 46. <sup>13</sup>C-NMR spectrum of Compound **4ca** in CDCl<sub>3</sub>

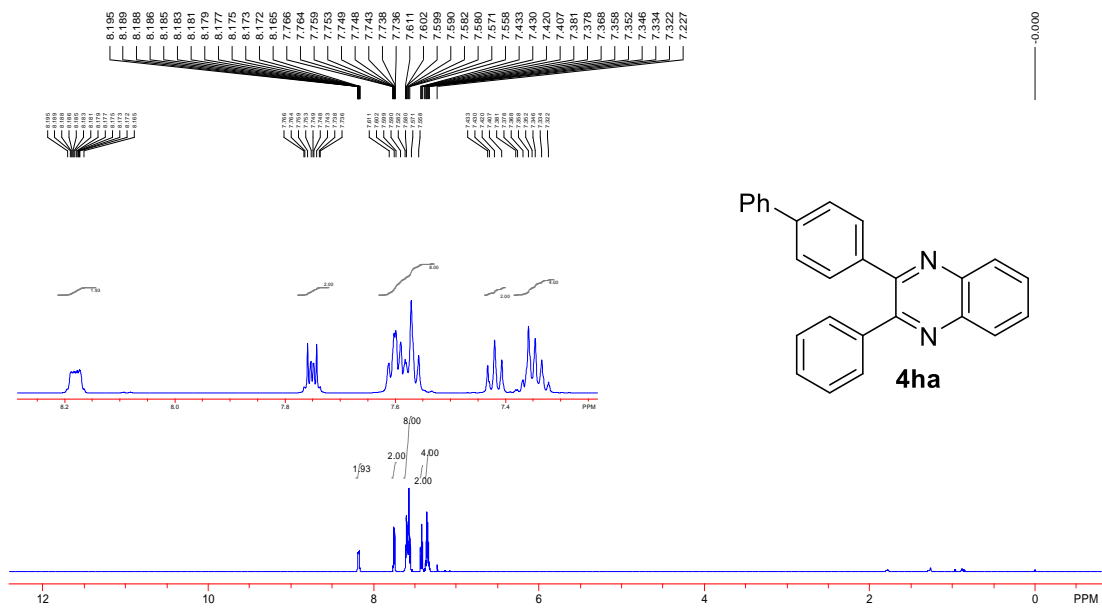

Supplementary Figure 47. <sup>1</sup>H-NMR spectrum of Compound **4ha** in CDCl<sub>3</sub>

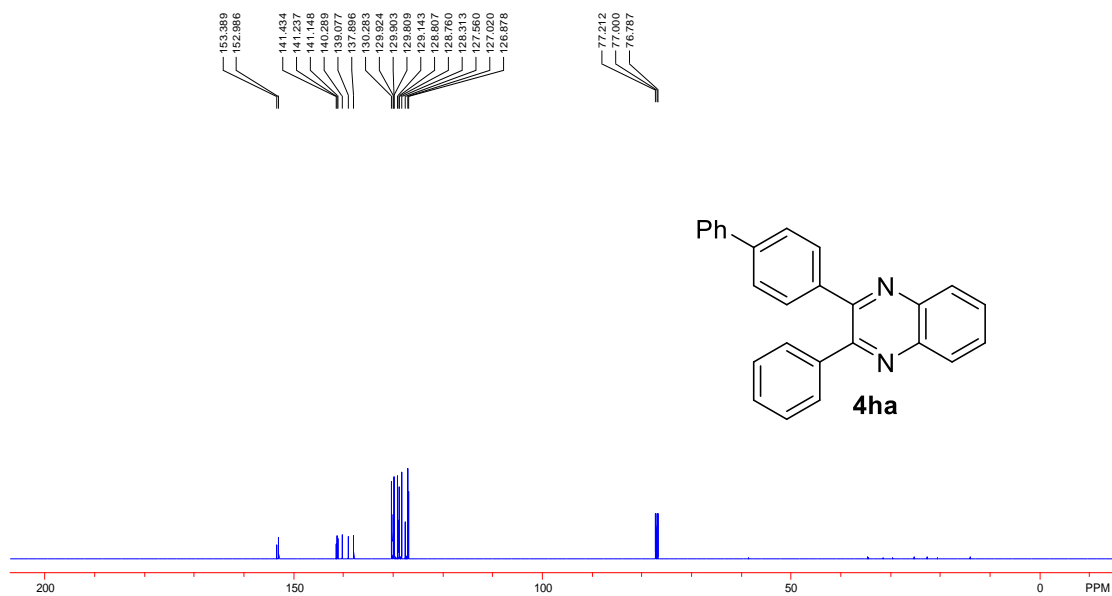

Supplementary Figure 48. <sup>13</sup>C-NMR spectrum of Compound **4ha** in CDCl<sub>3</sub>

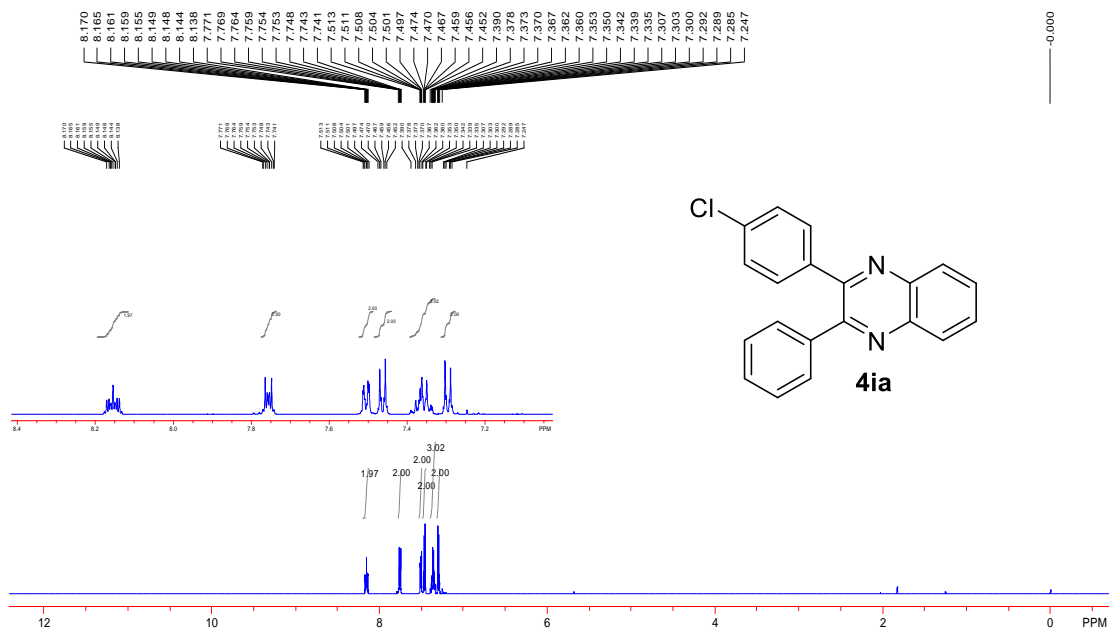

Supplementary Figure 49. <sup>1</sup>H-NMR spectrum of Compound **4ia** in CDCl<sub>3</sub>

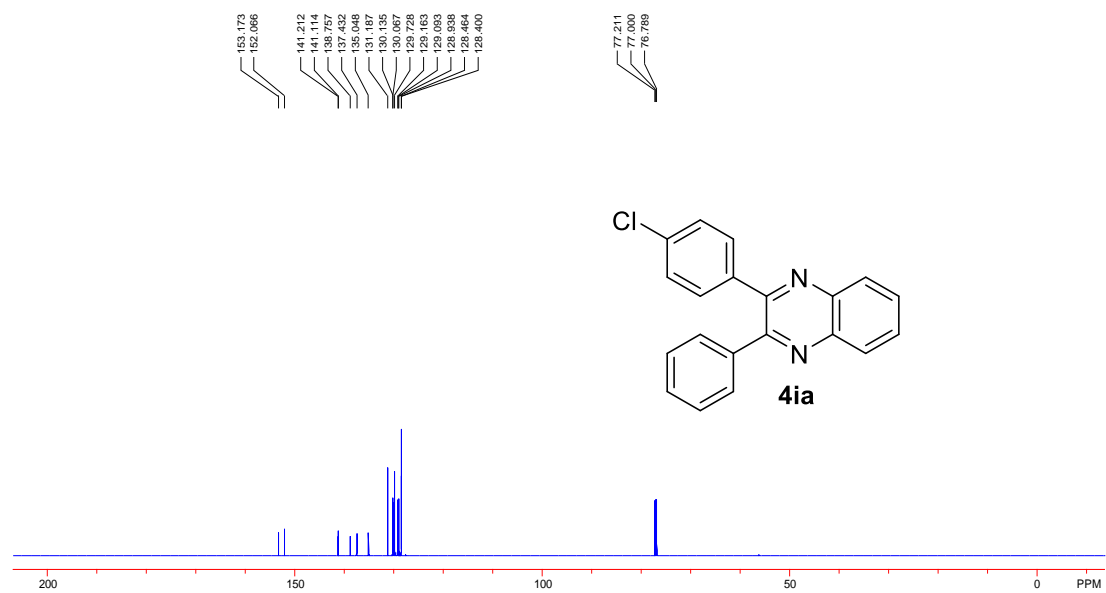

Supplementary Figure 50. <sup>13</sup>C-NMR spectrum of Compound **4ia** in CDCl<sub>3</sub>

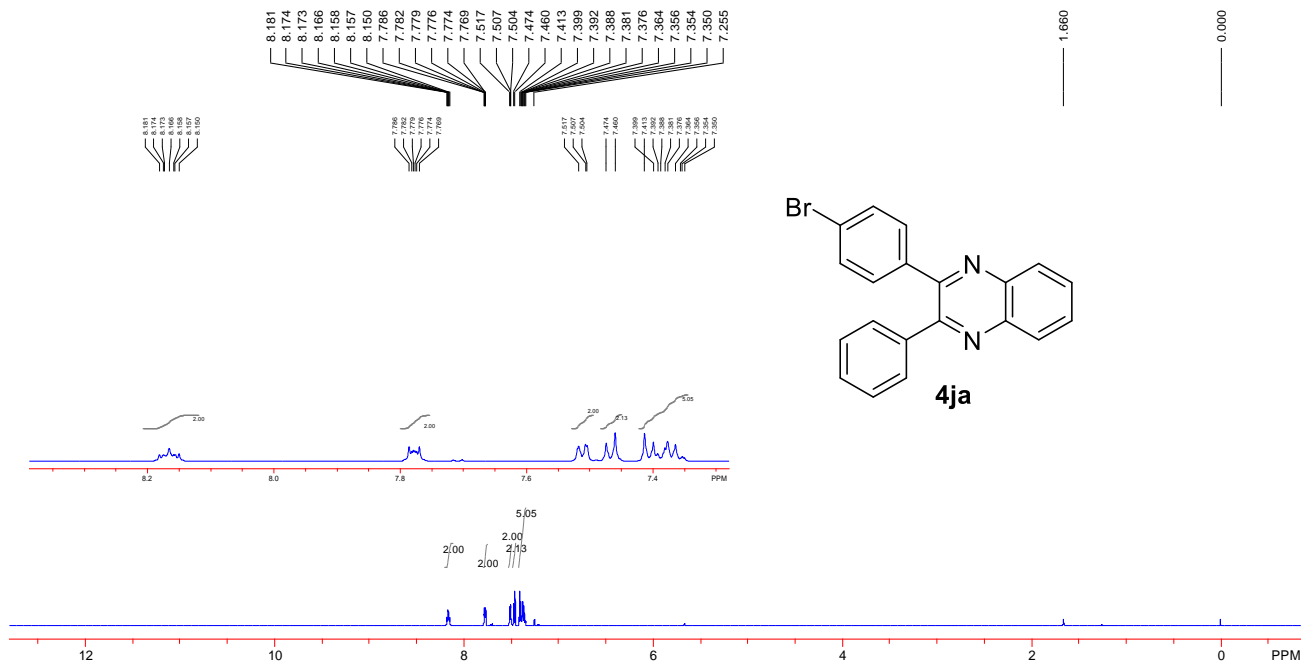

Supplementary Figure 51. <sup>1</sup>H-NMR spectrum of Compound 4ja in CDCl<sub>3</sub>

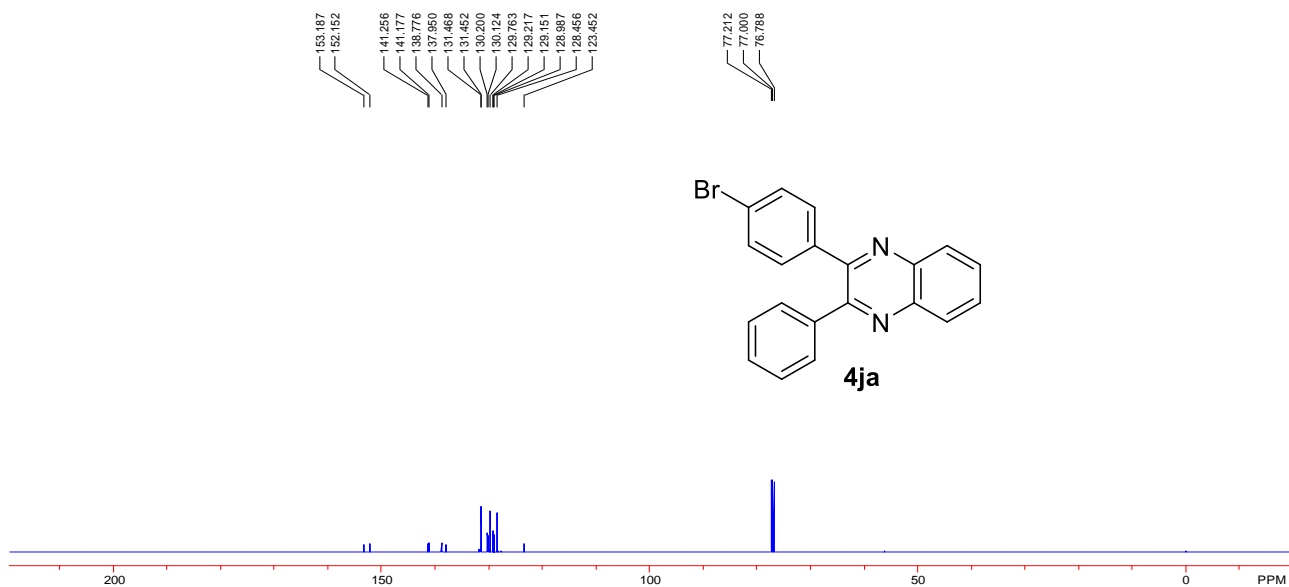

Supplementary Figure 52. <sup>13</sup>C-NMR spectrum of Compound 4ja in CDCl<sub>3</sub>

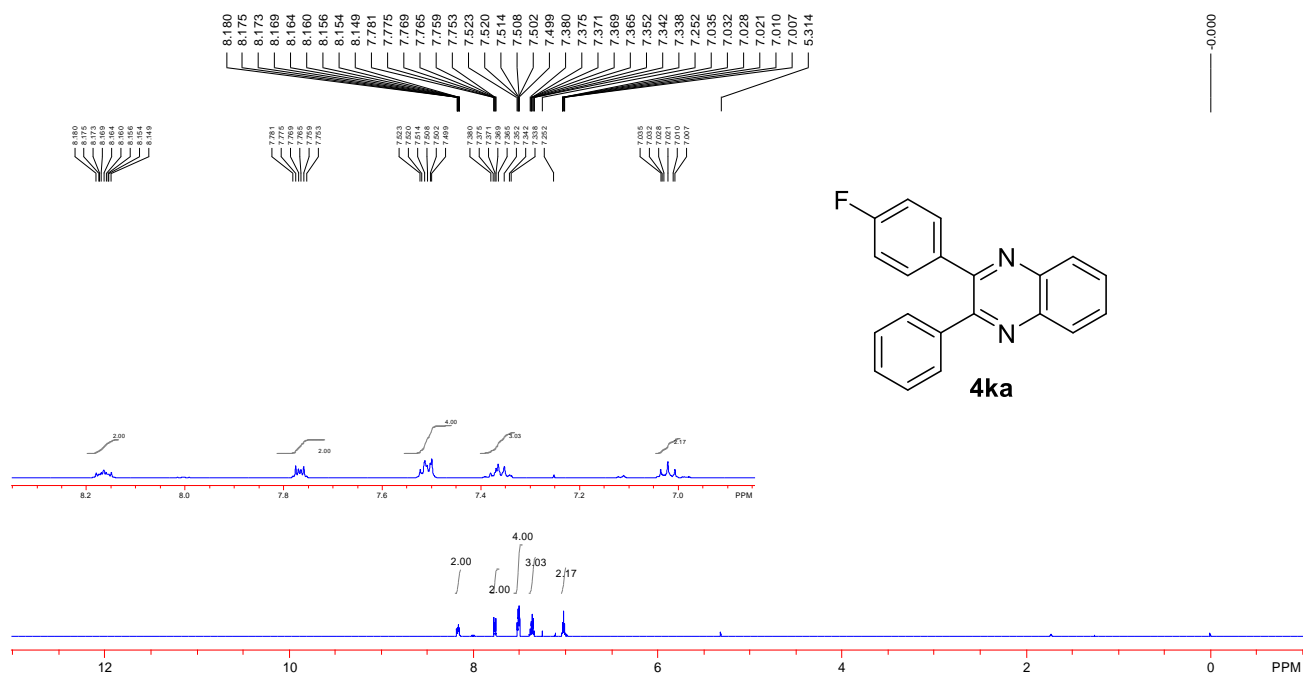

Supplementary Figure 53. <sup>1</sup>H-NMR spectrum of Compound **4ka** in CDCl<sub>3</sub>

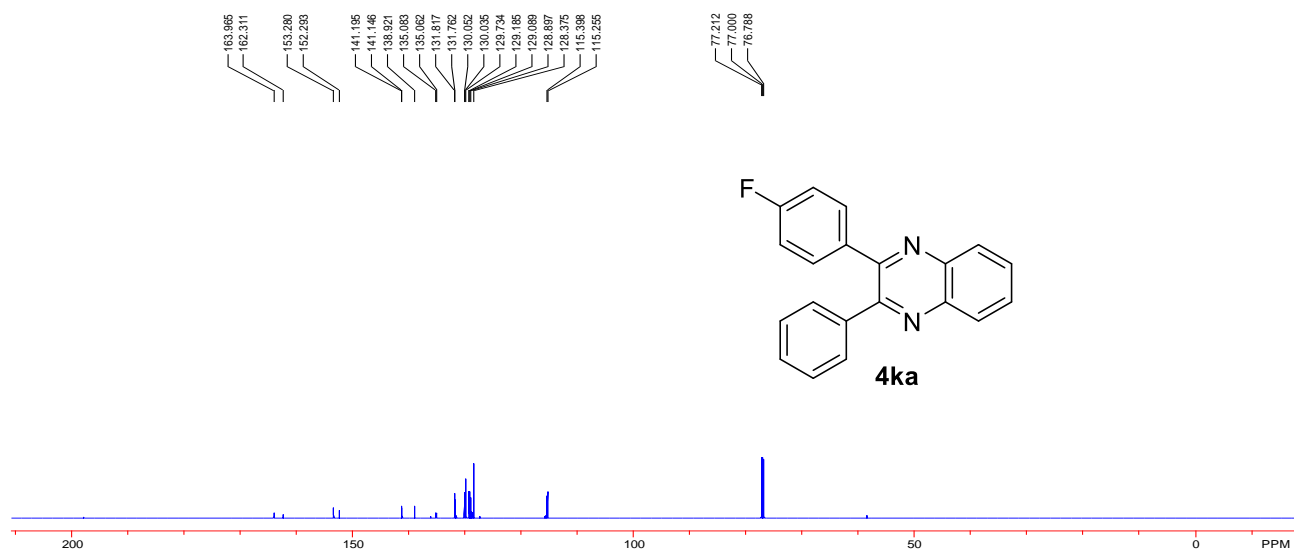

Supplementary Figure 54. <sup>13</sup>C-NMR spectrum of Compound **4ka** in CDCl<sub>3</sub>

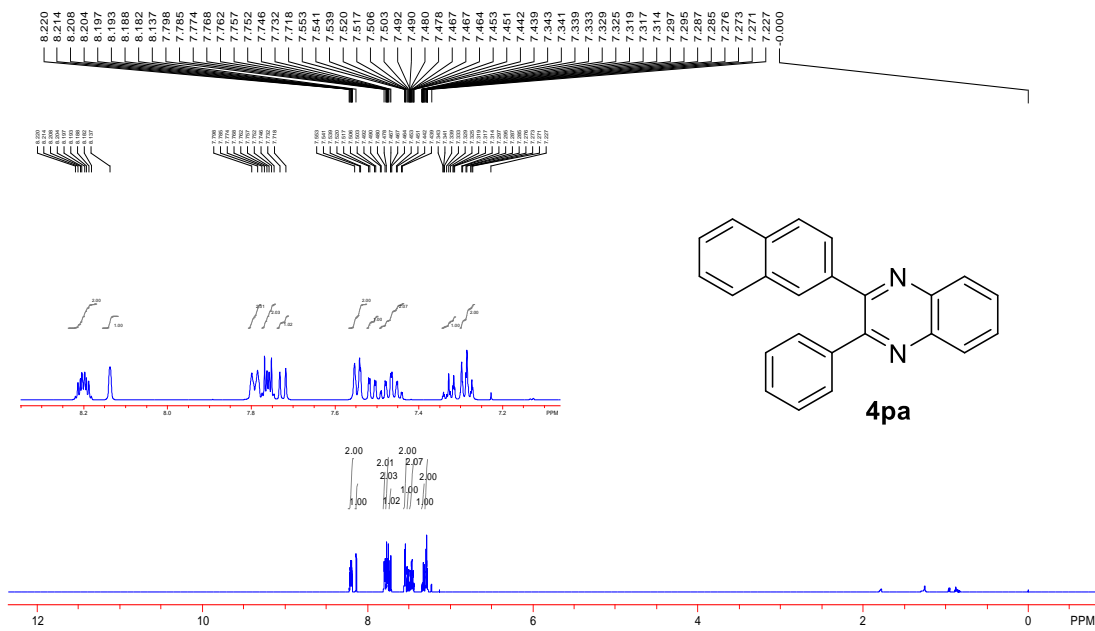

Supplementary Figure 55. <sup>1</sup>H-NMR spectrum of Compound **4pa** in CDCl<sub>3</sub>

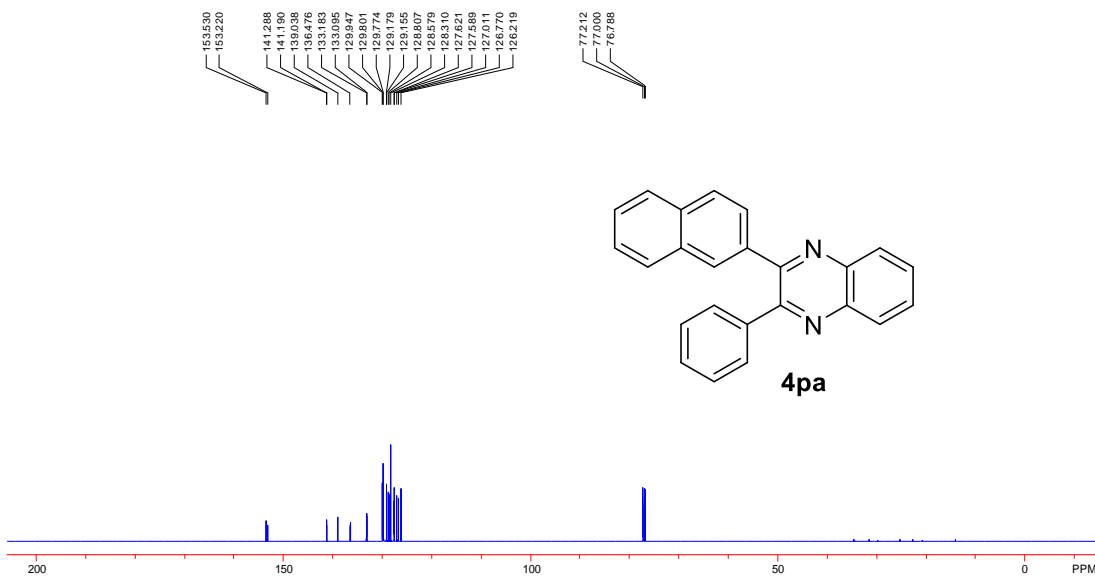

Supplementary Figure 56. <sup>13</sup>C-NMR spectrum of Compound **4pa** in CDCl<sub>3</sub>

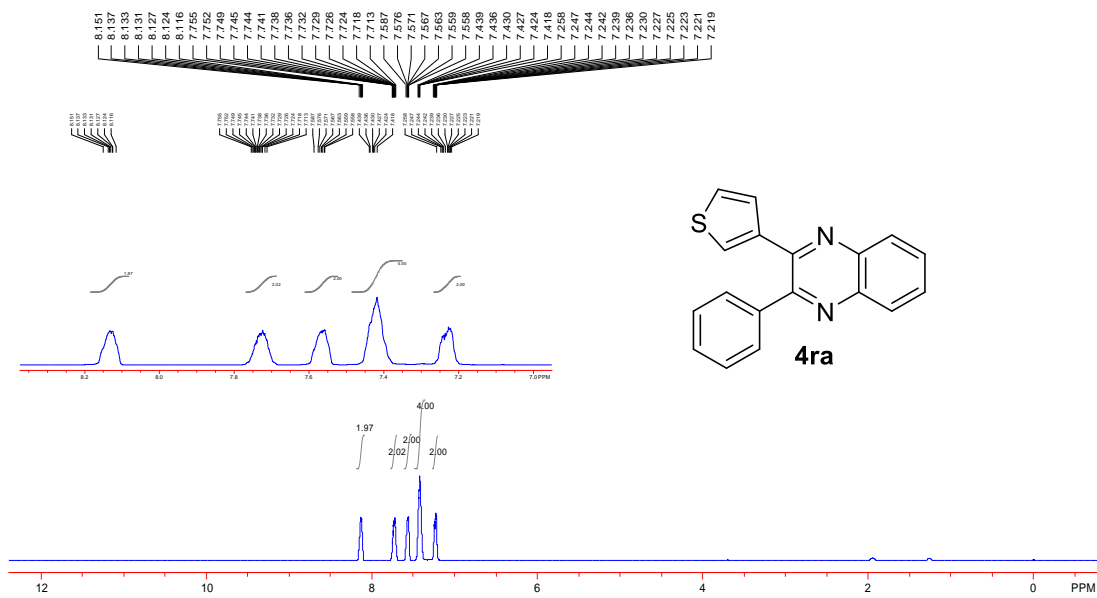

Supplementary Figure 57. <sup>1</sup>H-NMR spectrum of Compound **4ra** in CDCl<sub>3</sub>

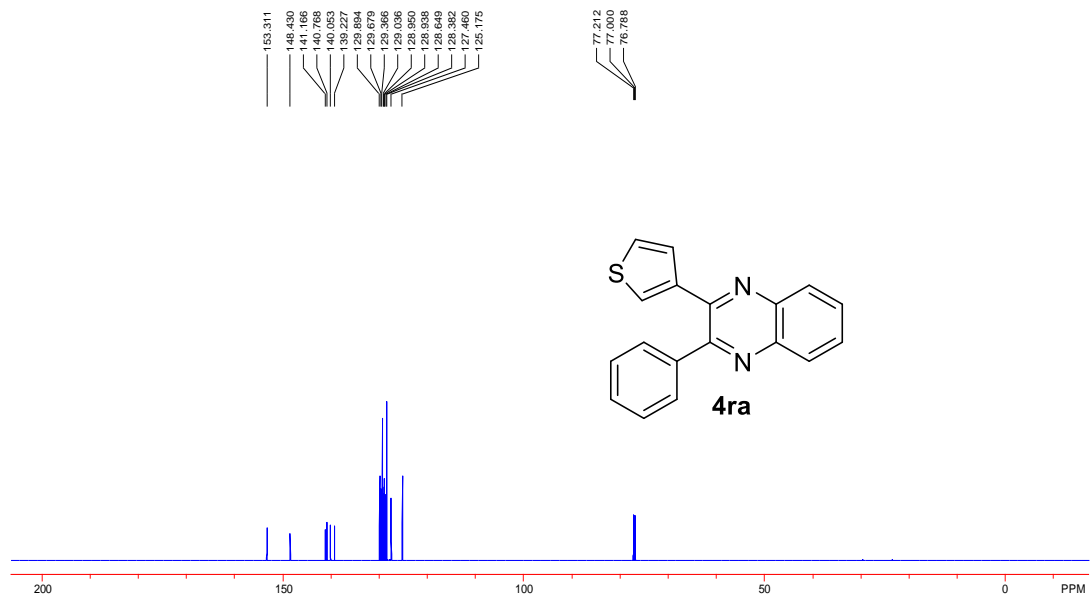

Supplementary Figure 58. <sup>13</sup>C-NMR spectrum of Compound **4ra** in CDCl<sub>3</sub>



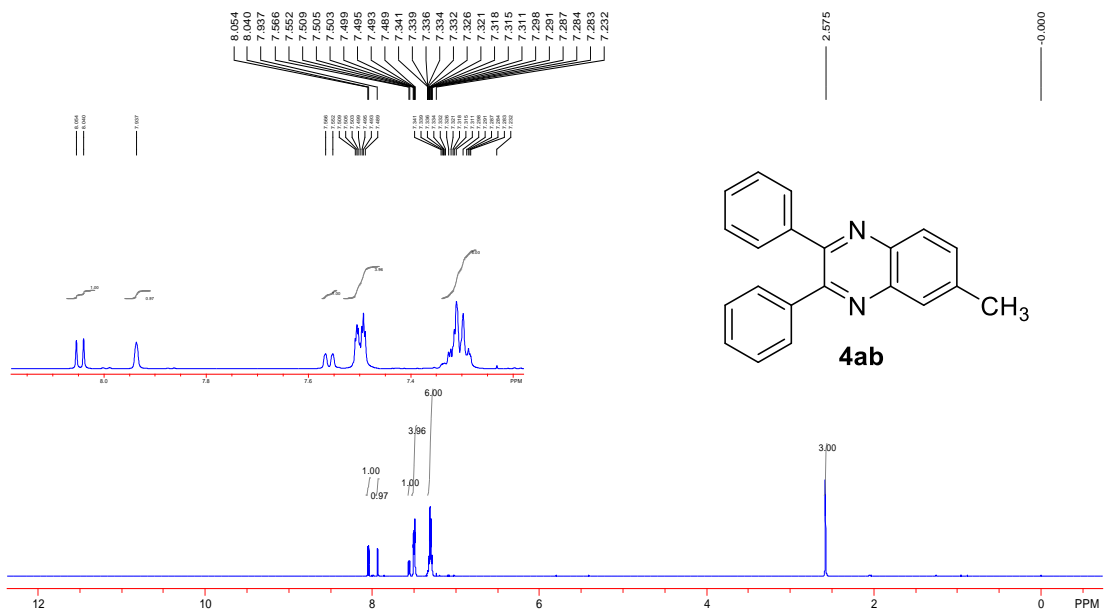

Supplementary Figure 59. <sup>1</sup>H-NMR spectrum of Compound **4ab** in CDCl<sub>3</sub>

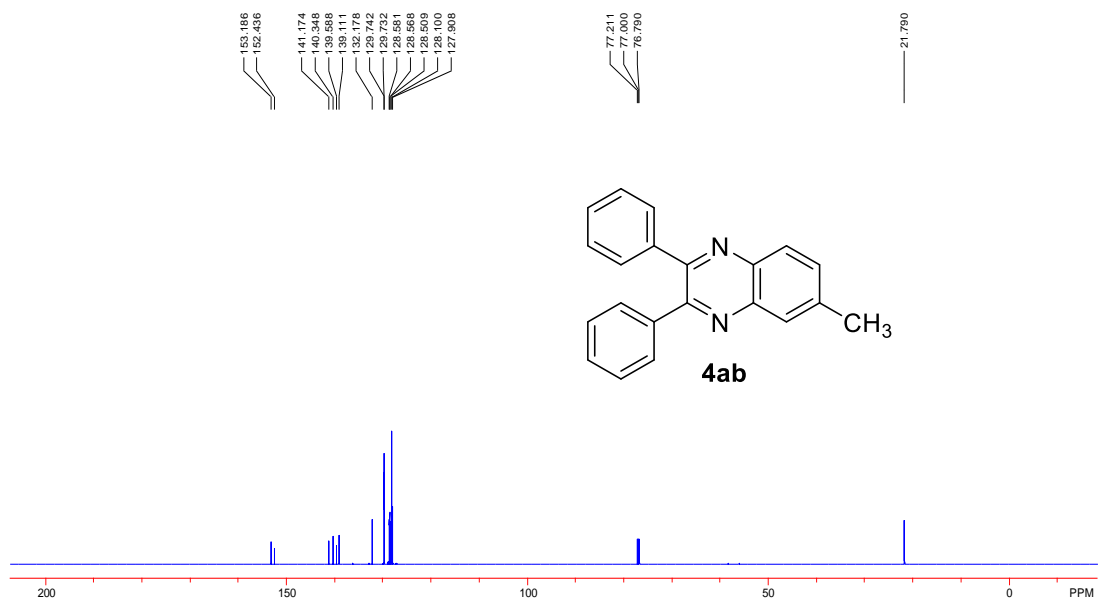

Supplementary Figure 60. <sup>13</sup>C-NMR spectrum of Compound **4ab** in CDCl<sub>3</sub>

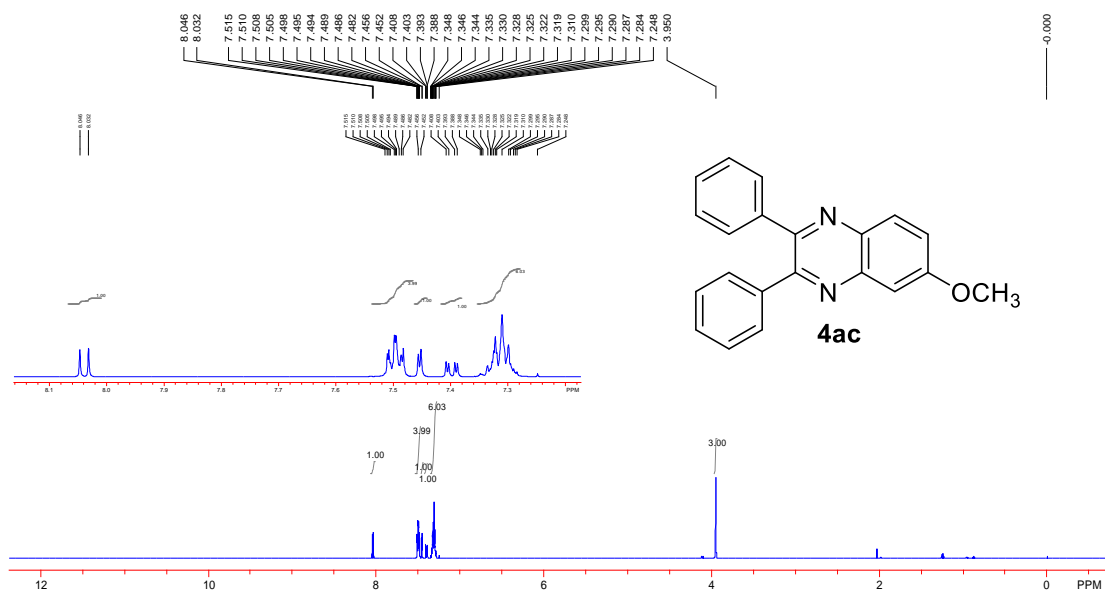

Supplementary Figure 61. <sup>1</sup>H-NMR spectrum of Compound **4ac** in CDCl<sub>3</sub>

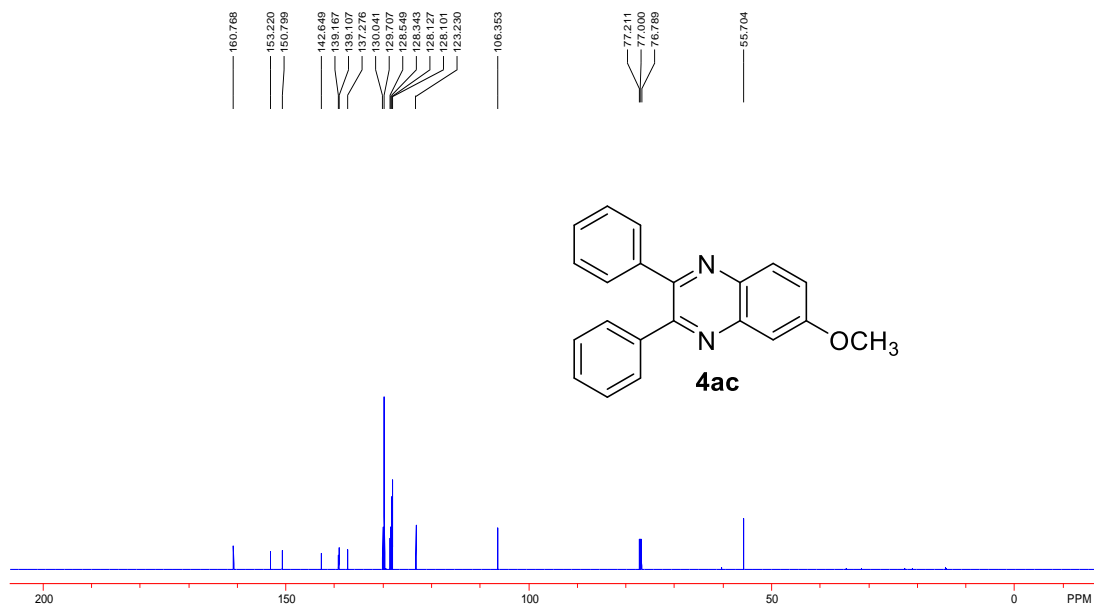

Supplementary Figure 62. <sup>13</sup>C-NMR spectrum of Compound **4ac** in CDCl<sub>3</sub>

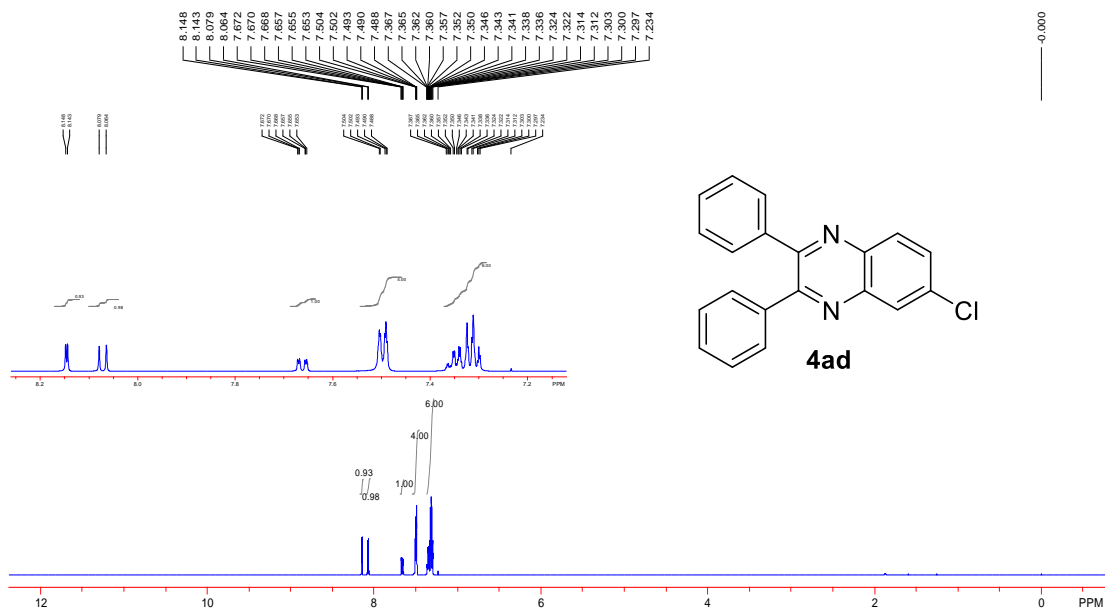

Supplementary Figure 63. <sup>1</sup>H-NMR spectrum of Compound **4ad** in CDCl<sub>3</sub>

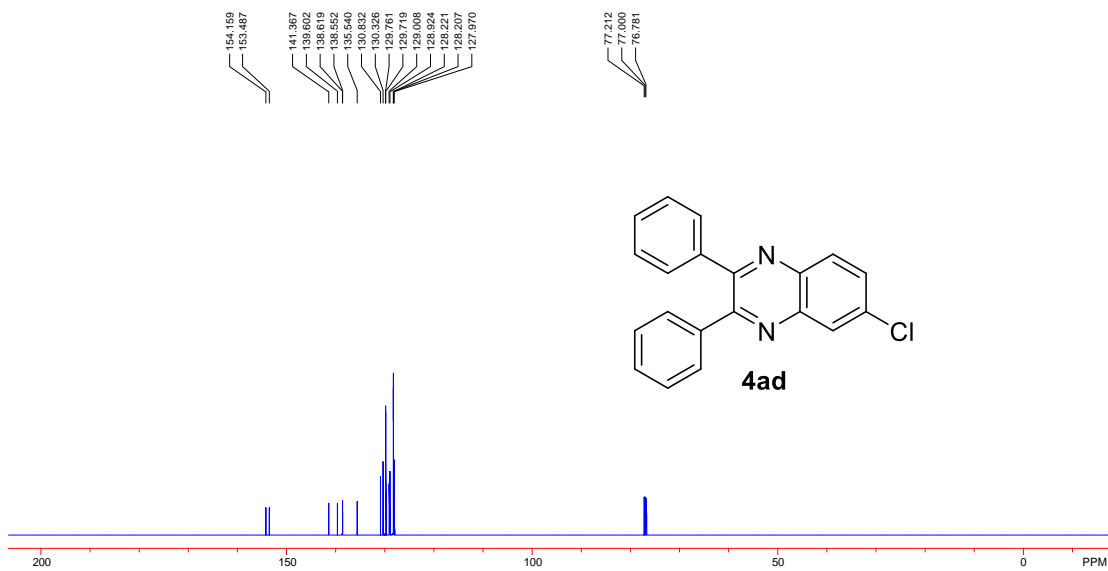

Supplementary Figure 64. <sup>13</sup>C-NMR spectrum of Compound **4ad** in CDCl<sub>3</sub>

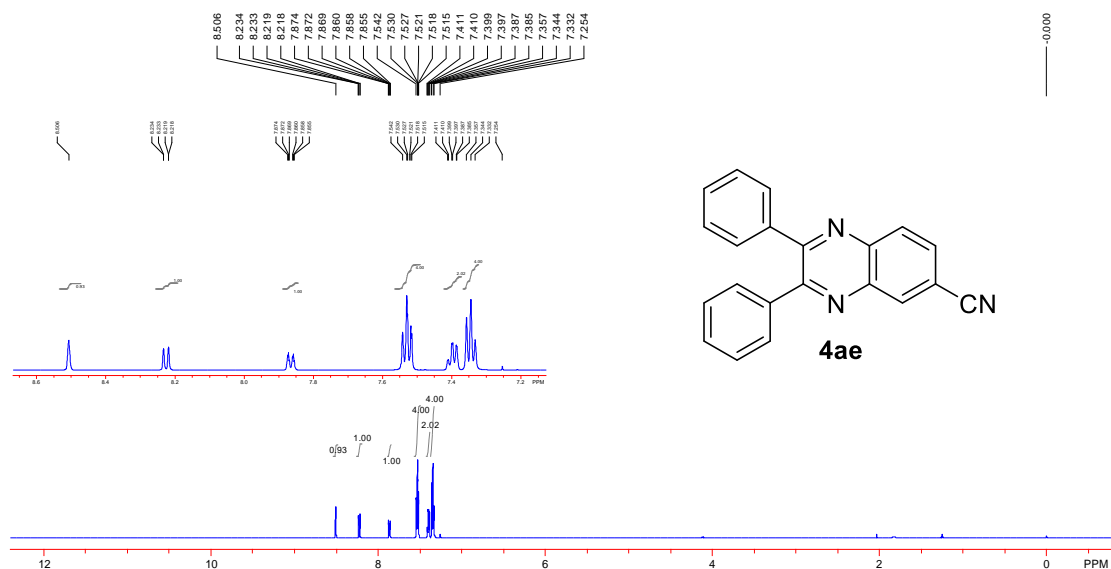

Supplementary Figure 65. <sup>1</sup>H-NMR spectrum of Compound **4ae** in CDCl<sub>3</sub>

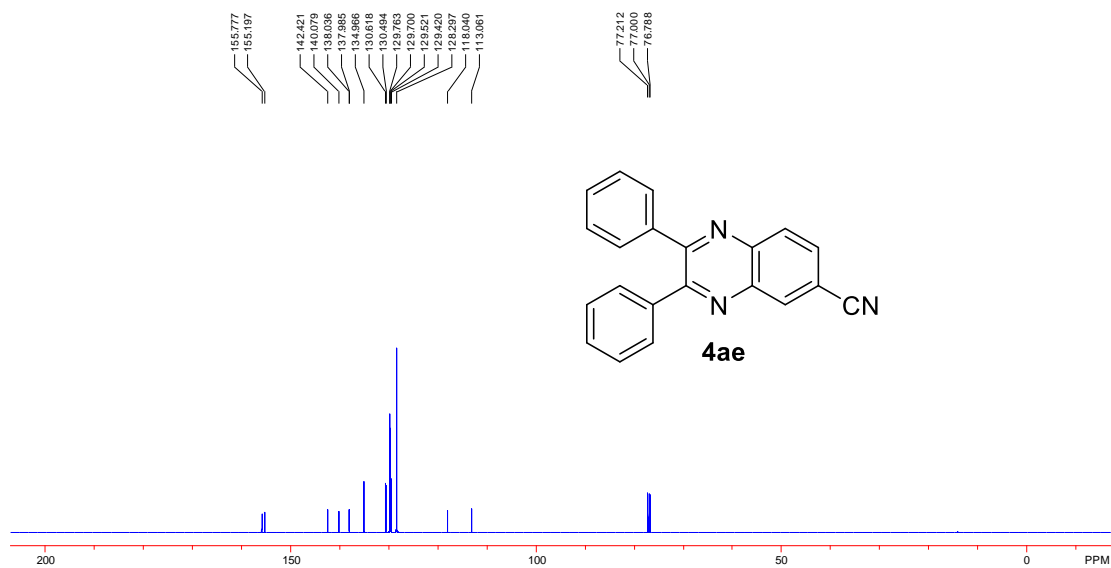

Supplementary Figure 66. <sup>13</sup>C-NMR spectrum of Compound **4ae** in CDCl<sub>3</sub>

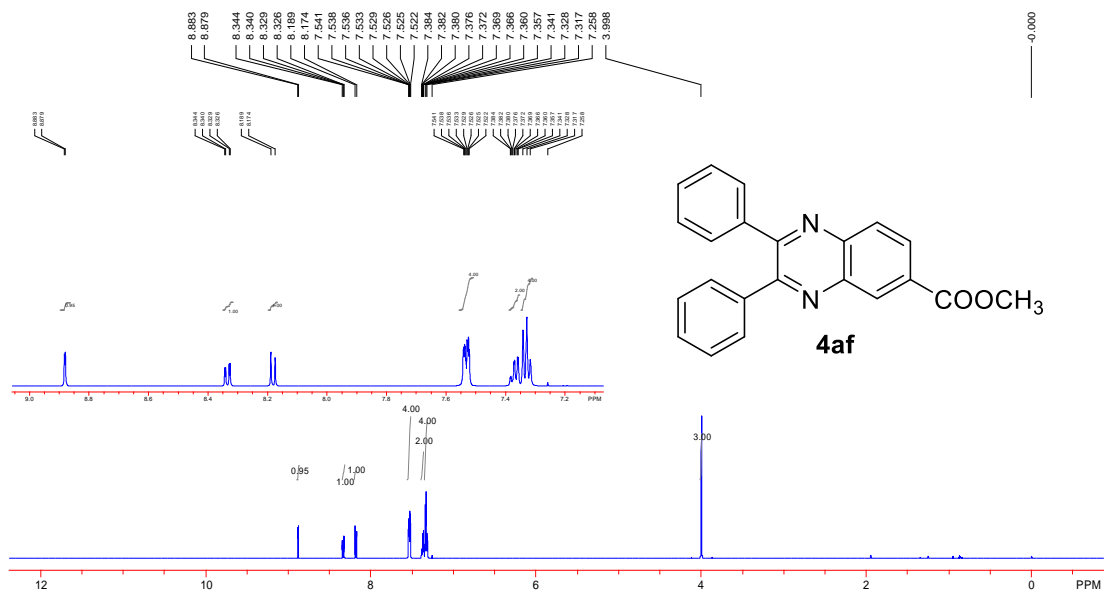

Supplementary Figure 67. <sup>1</sup>H-NMR spectrum of Compound **4af** in CDCl<sub>3</sub>

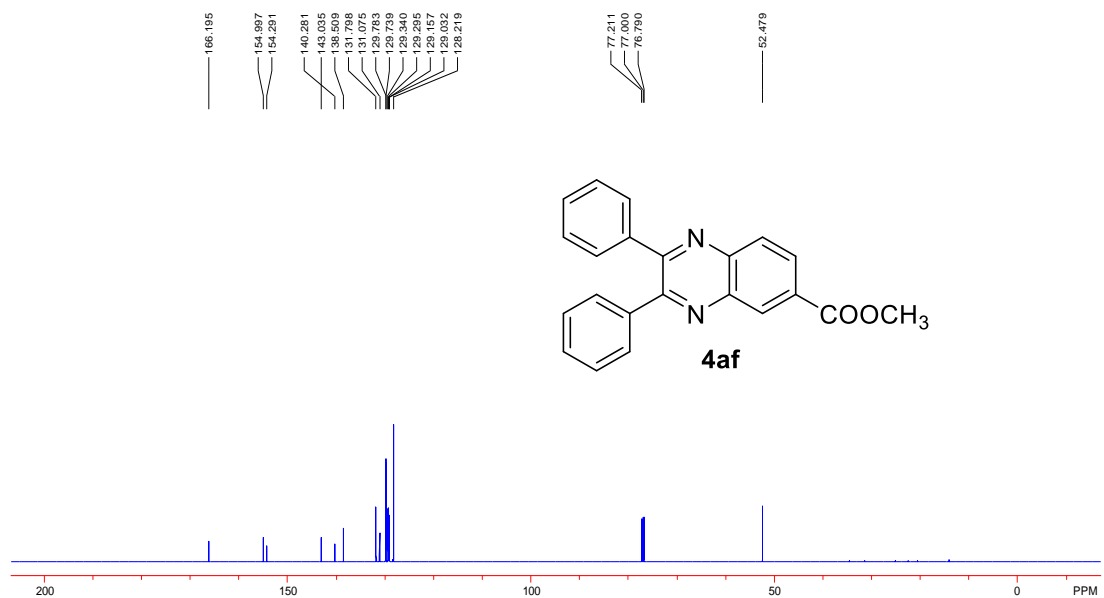

Supplementary Figure 68. <sup>13</sup>C-NMR spectrum of Compound **4af** in CDCl<sub>3</sub>

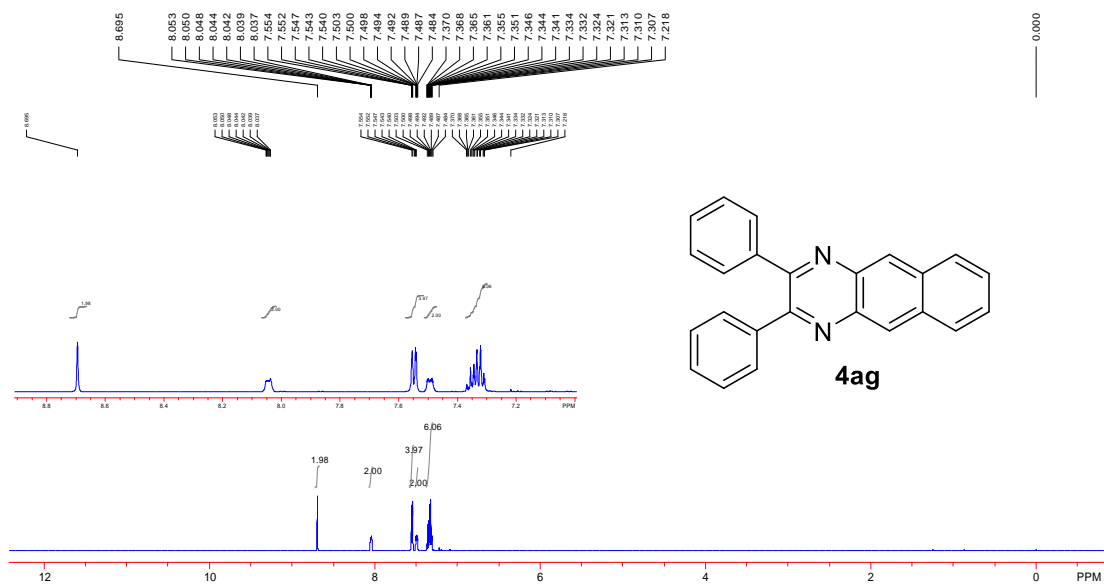

Supplementary Figure 69. <sup>1</sup>H-NMR spectrum of Compound **4ag** in CDCl<sub>3</sub>

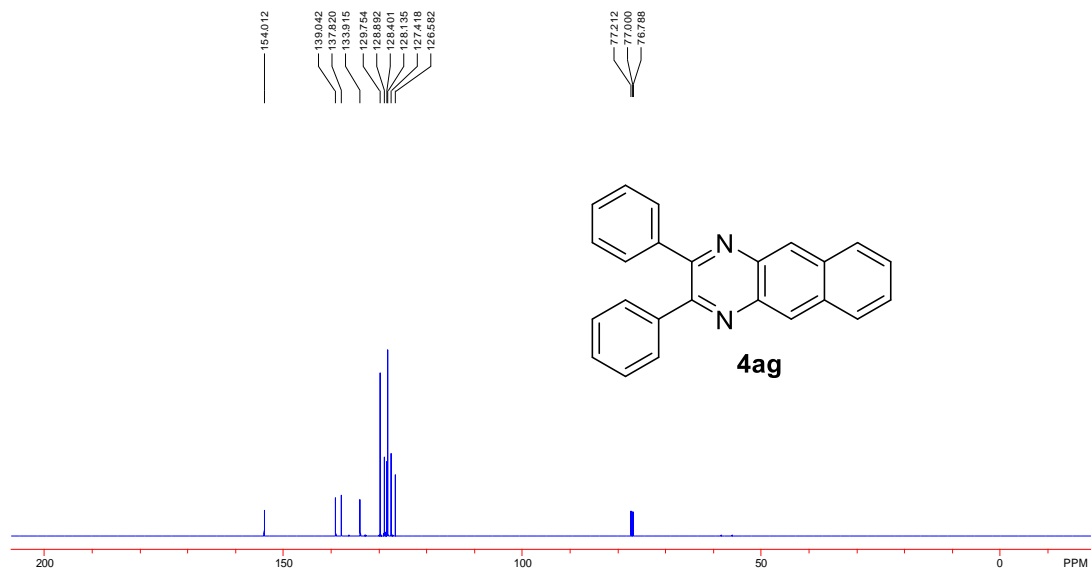

Supplementary Figure 70. <sup>13</sup>C-NMR spectrum of Compound **4ag** in CDCl<sub>3</sub>



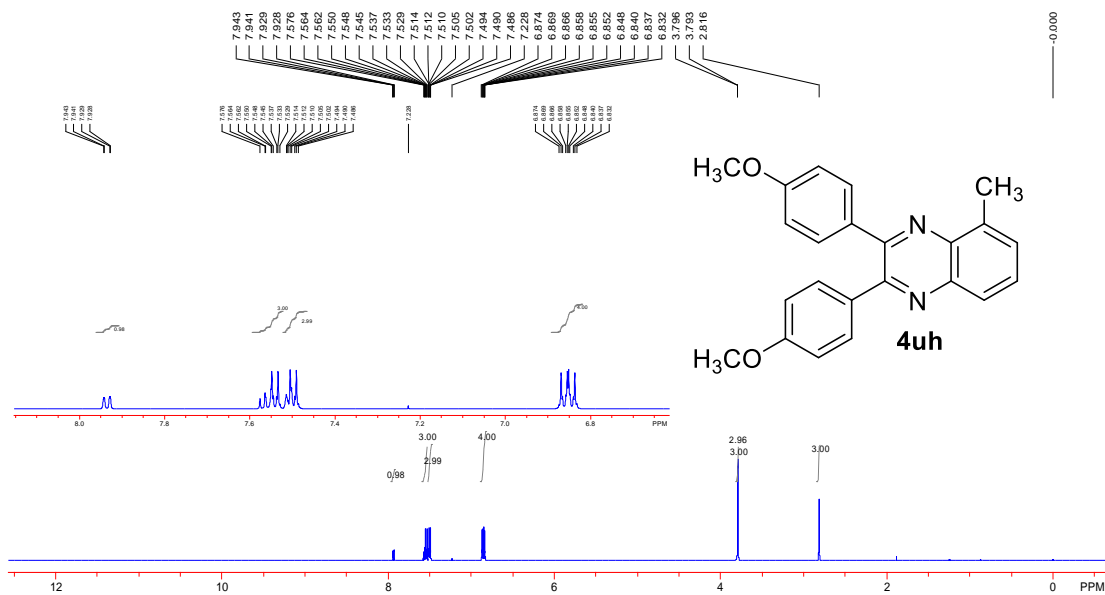

Supplementary Figure 73. <sup>1</sup>H-NMR spectrum of Compound **4uh** in CDCl<sub>3</sub>

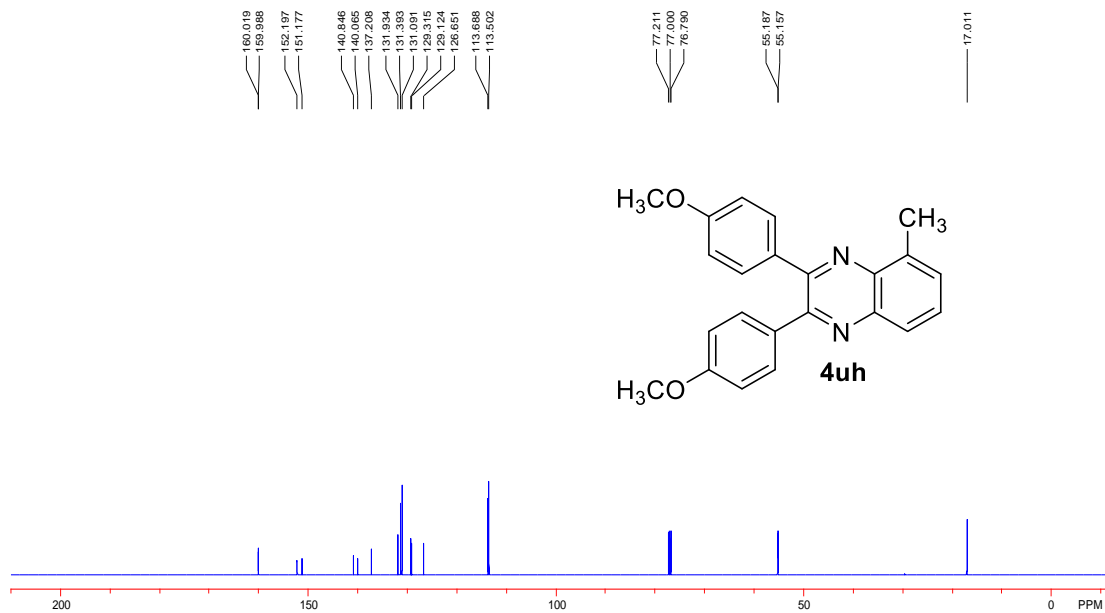

Supplementary Figure 74. <sup>13</sup>C-NMR spectrum of Compound **4uh** in CDCl<sub>3</sub>



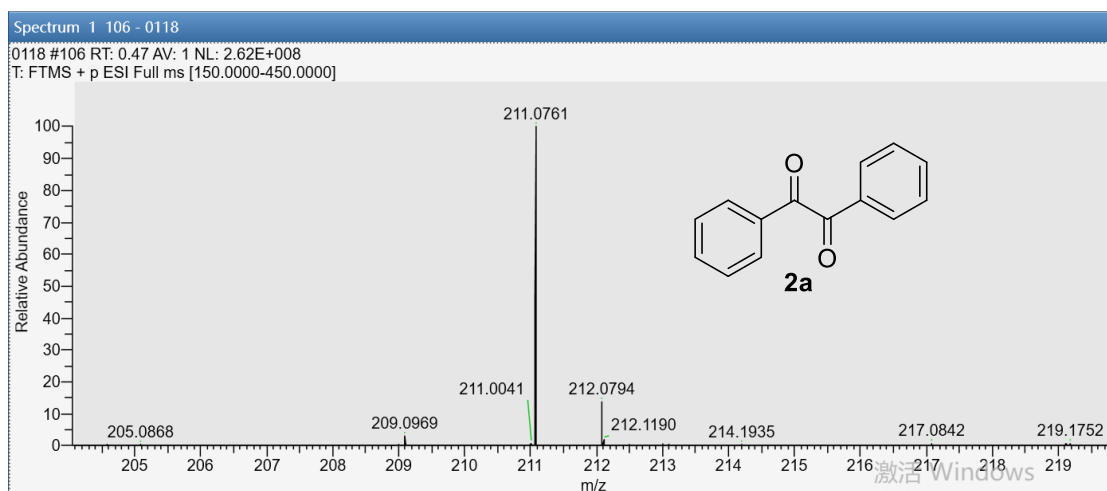

**Supplementary Figure 75.** HRMS spectrum of Compound **2a**.

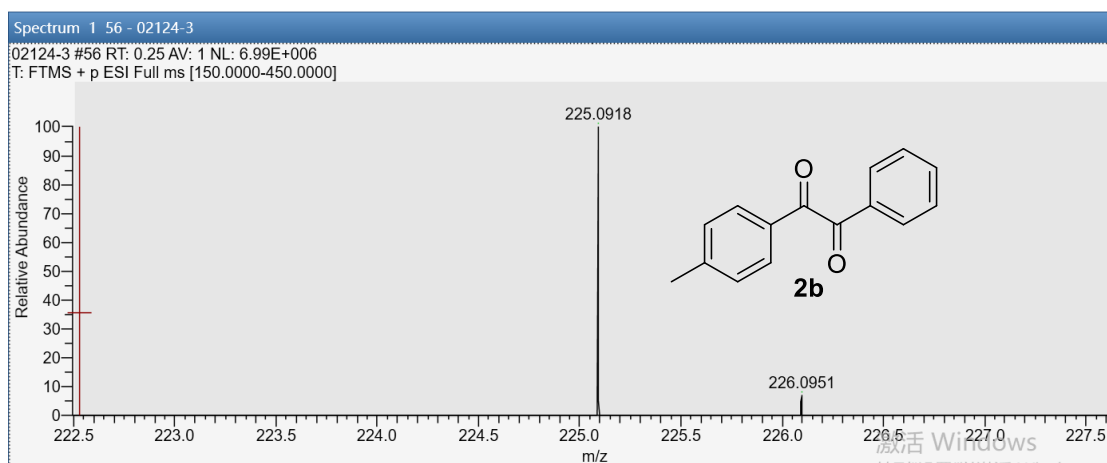

**Supplementary Figure 76.** HRMS spectrum of Compound **2b**.

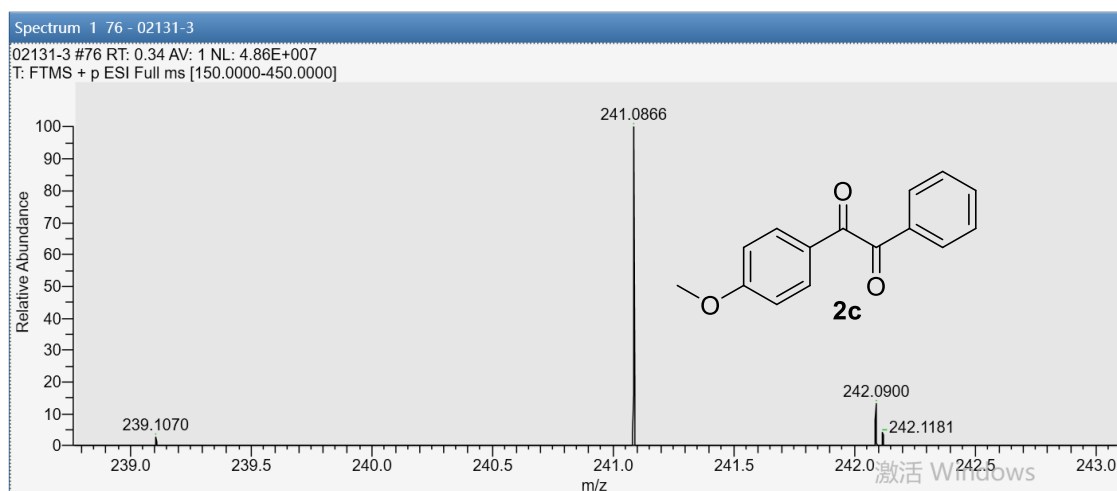

**Supplementary Figure 77.** HRMS spectrum of Compound **2c**.

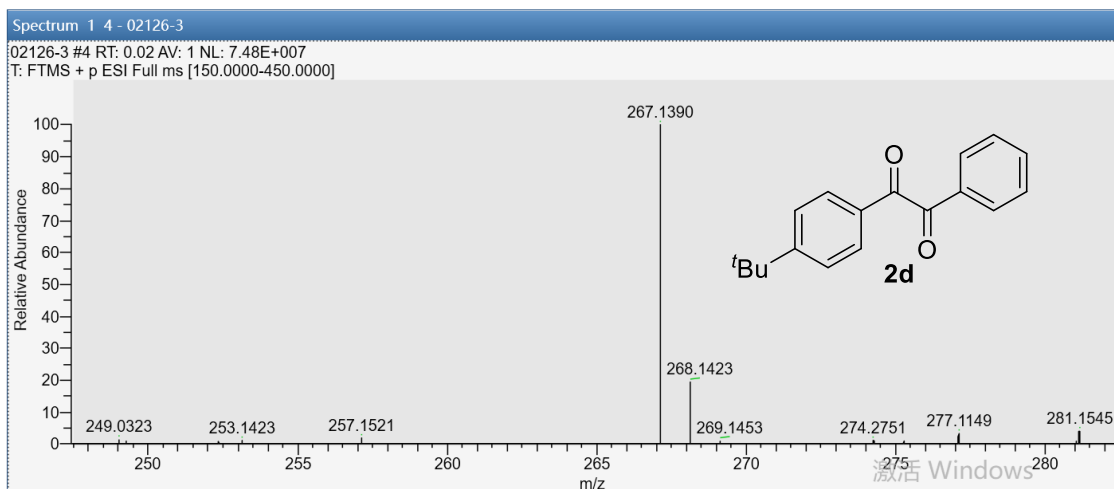

Supplementary Figure 78. HRMS spectrum of Compound 2d.

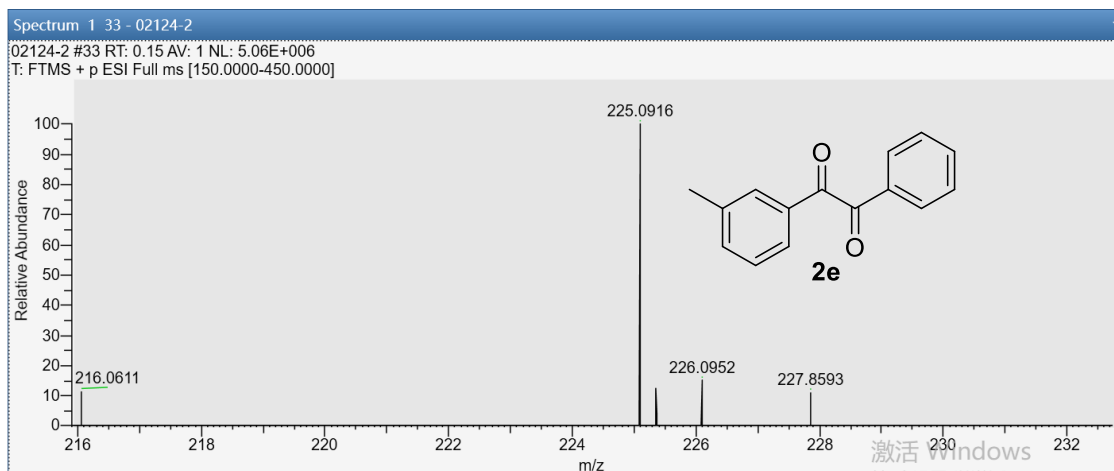

Supplementary Figure 79. HRMS spectrum of Compound 2e.

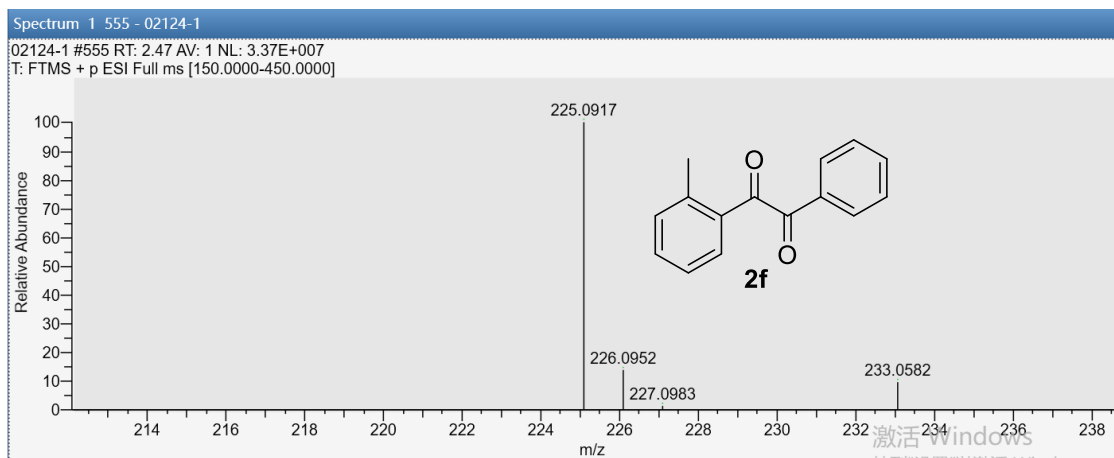

Supplementary Figure 80. HRMS spectrum of Compound 2f.

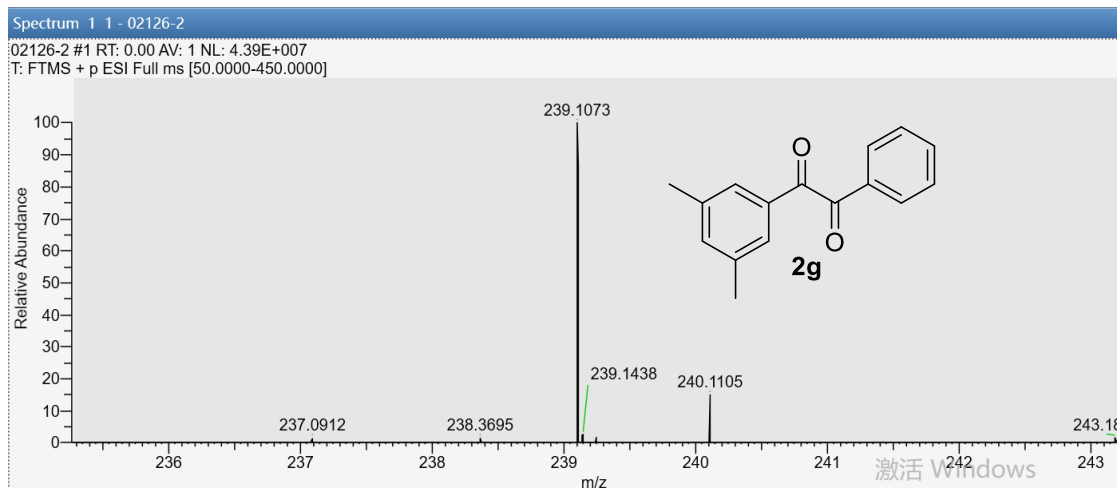

**Supplementary Figure 81.** HRMS spectrum of Compound **2g**.

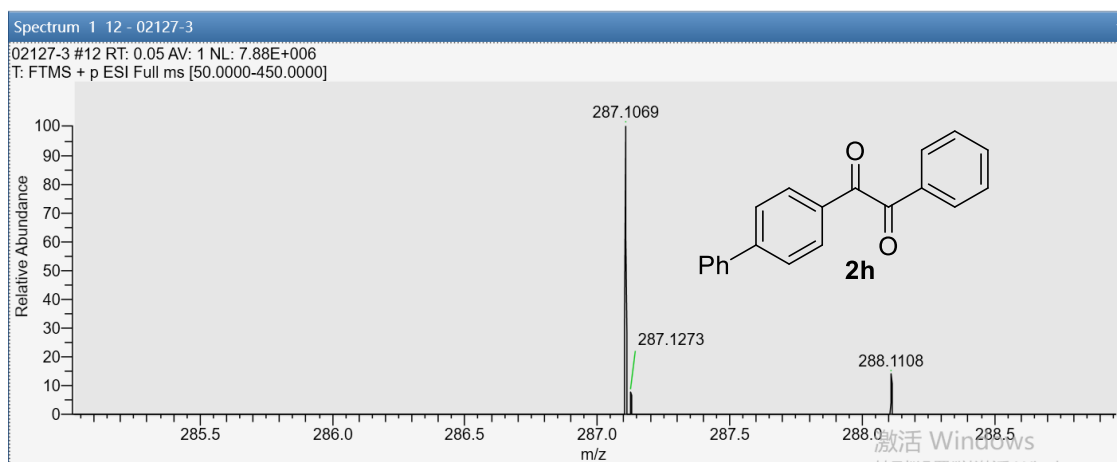

**Supplementary Figure 82.** HRMS spectrum of Compound **2h**.

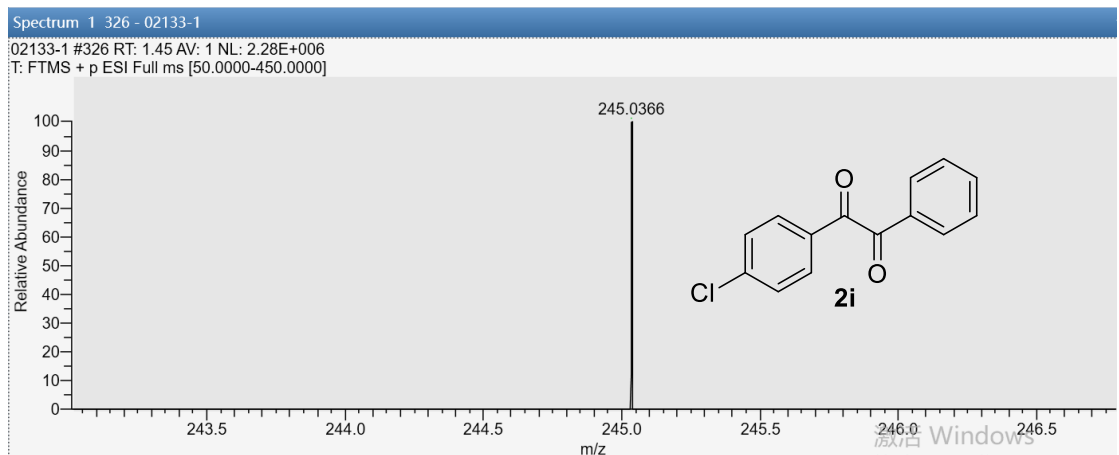

**Supplementary Figure 83.** HRMS spectrum of Compound **2i**.

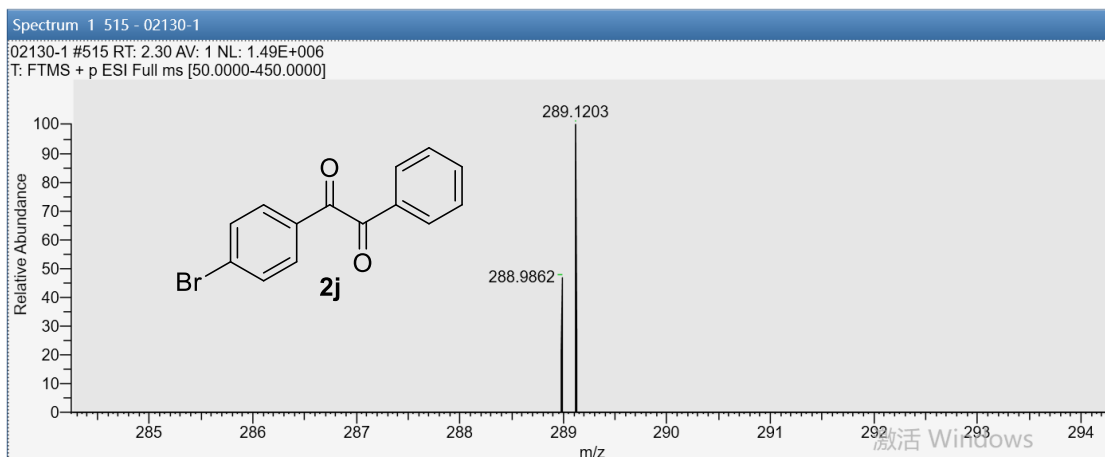

Supplementary Figure 84. HRMS spectrum of Compound **2j**.

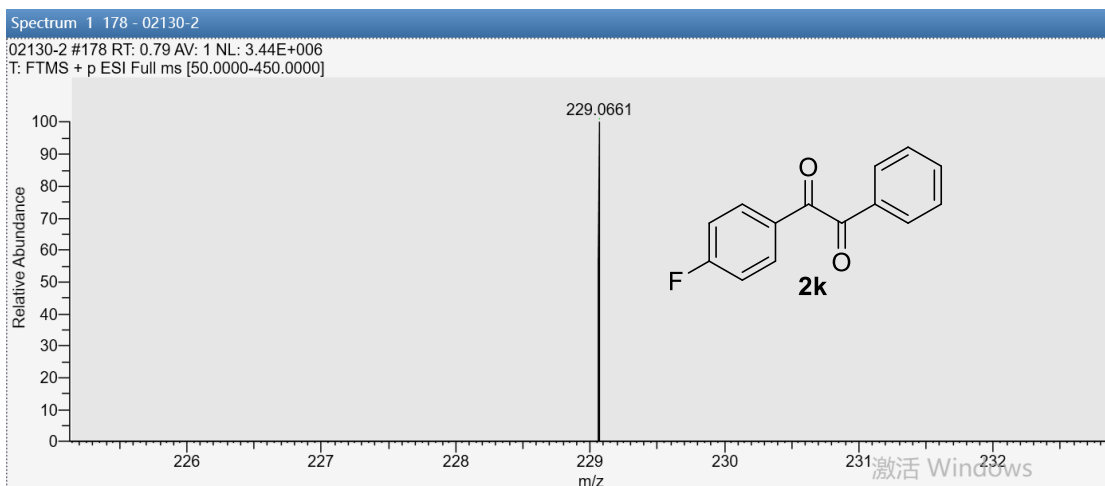

Supplementary Figure 85. HRMS spectrum of Compound **2k**.

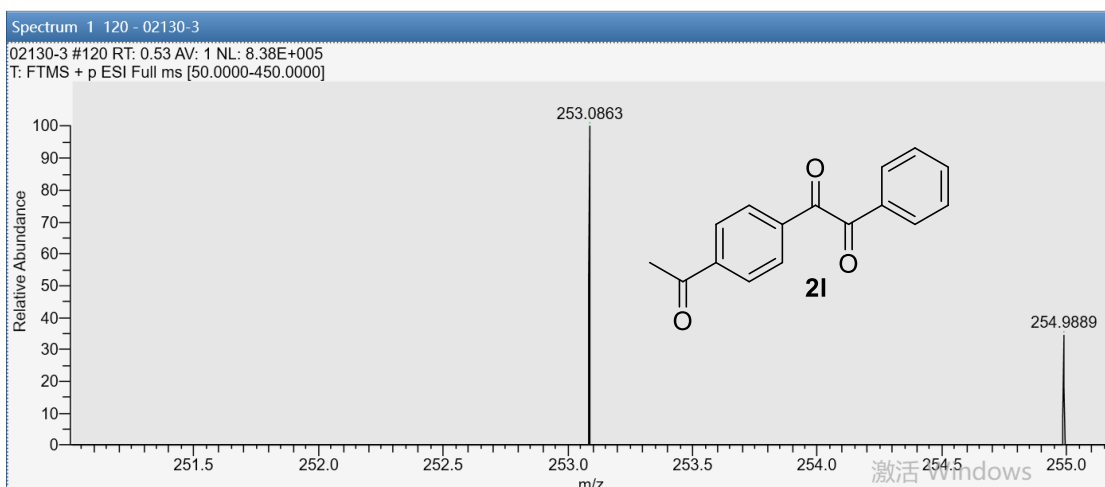

Supplementary Figure 86. HRMS spectrum of Compound **2l**.

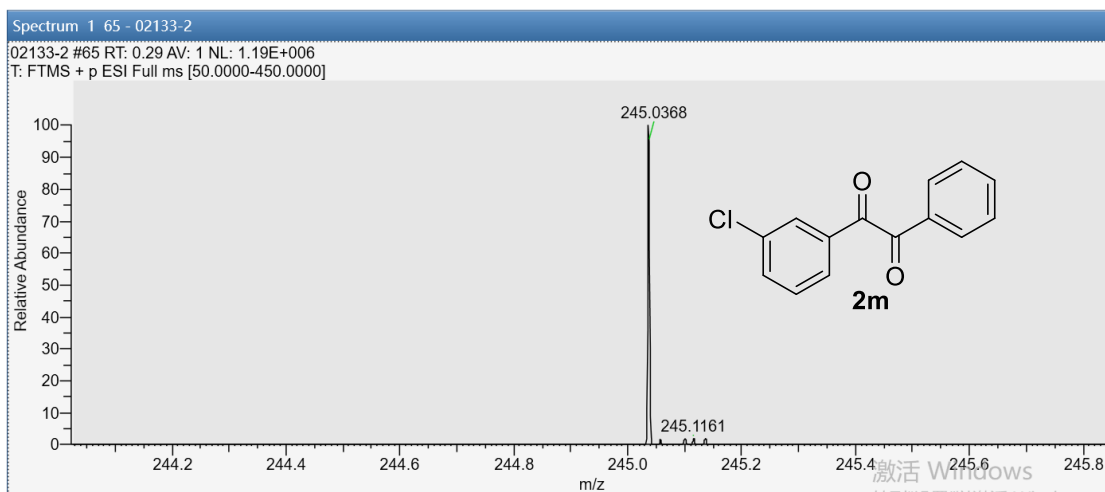

**Supplementary Figure 87.** HRMS spectrum of Compound **2m**.

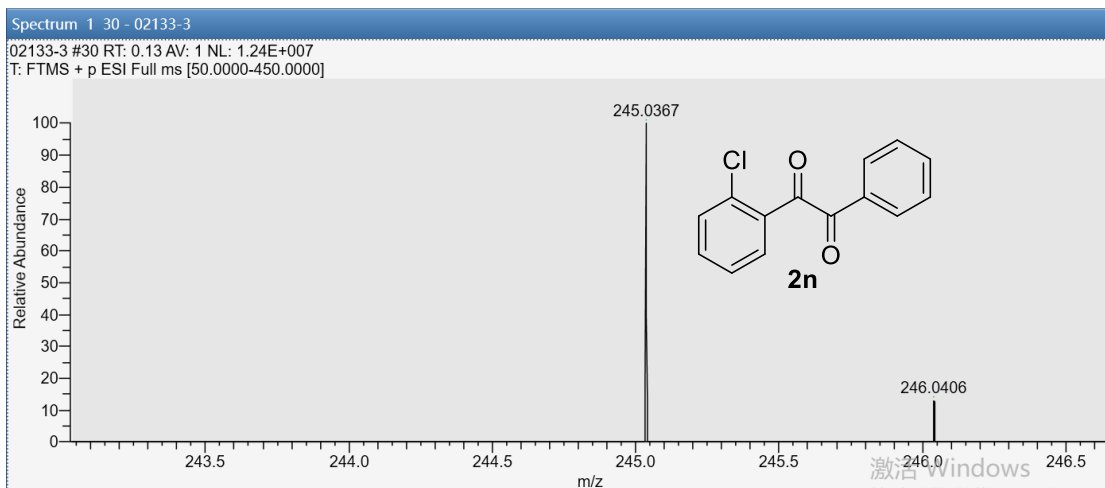

**Supplementary Figure 88.** HRMS spectrum of Compound **2n**.

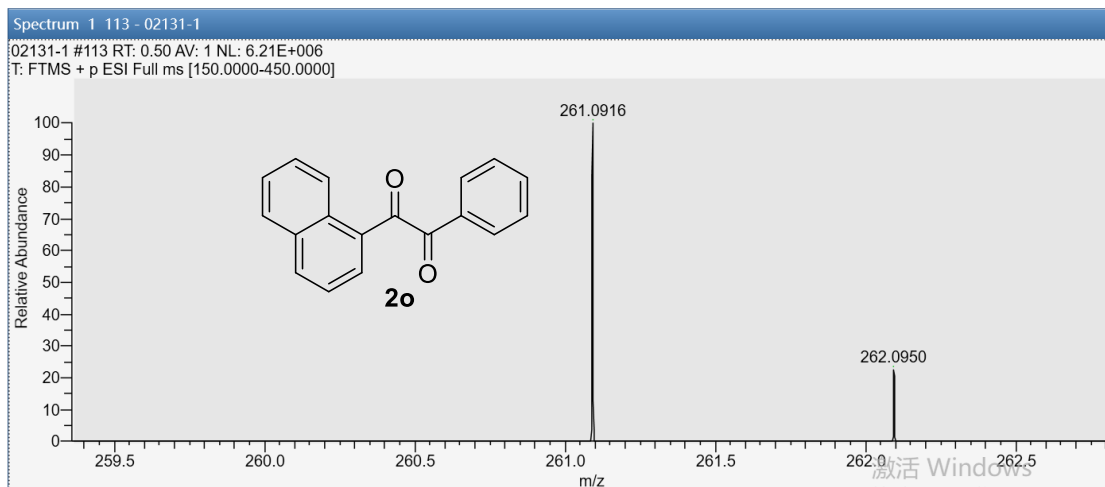

**Supplementary Figure 89.** HRMS spectrum of Compound **2o**.

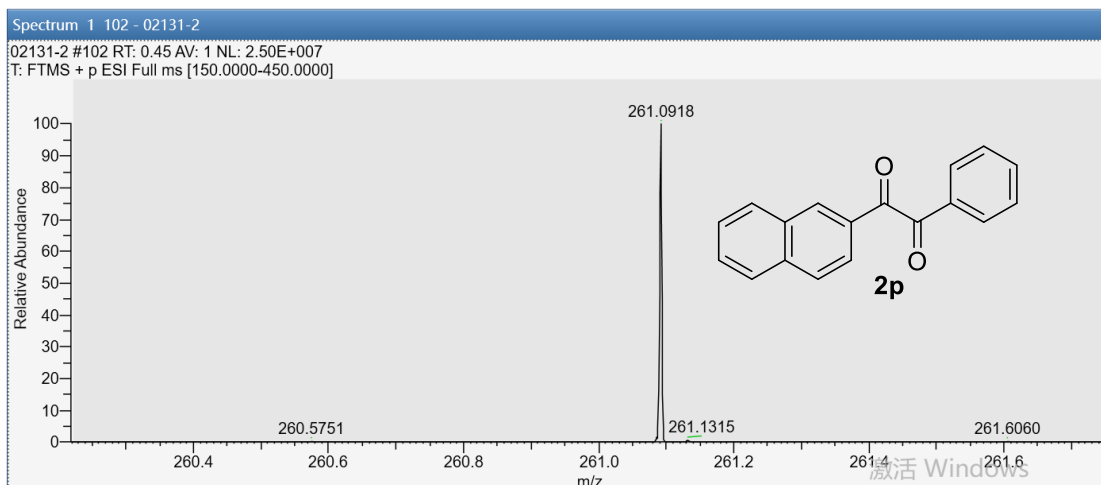

**Supplementary Figure 90.** HRMS spectrum of Compound **2p**.

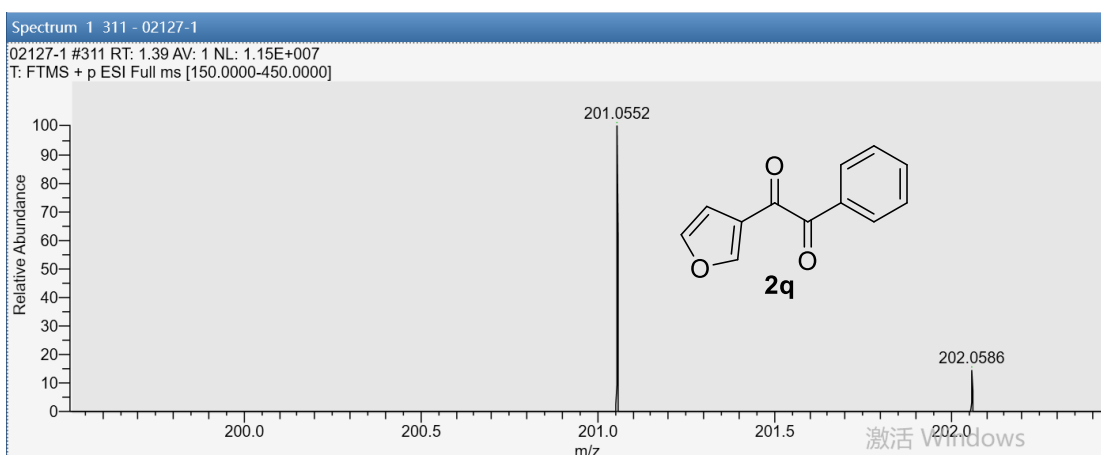

**Supplementary Figure 91.** HRMS spectrum of Compound **2q**.

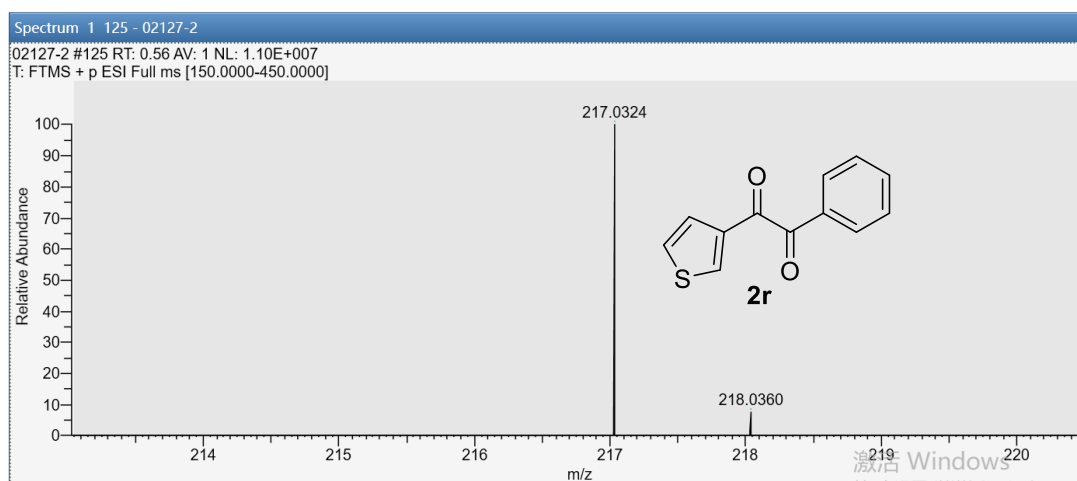

**Supplementary Figure 92.** HRMS spectrum of Compound **2r**.

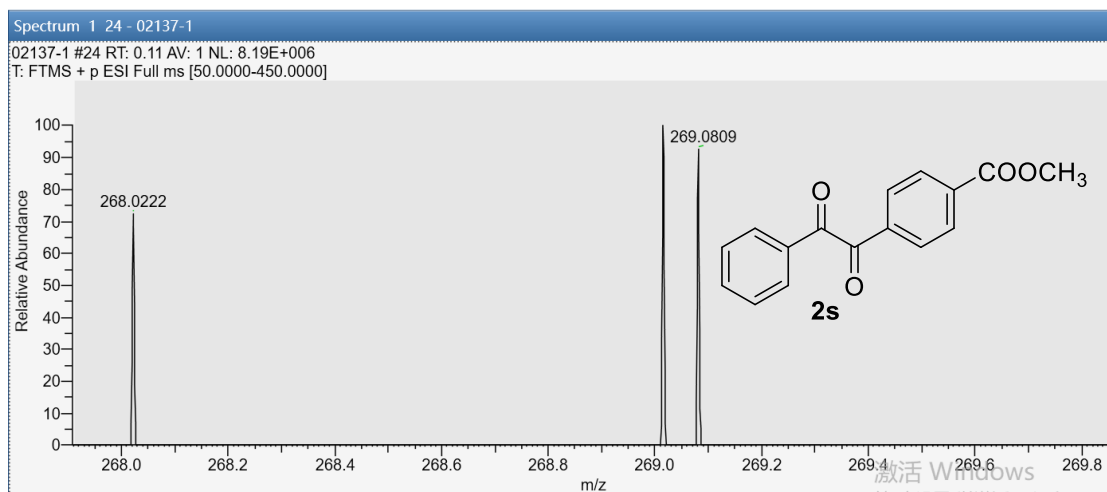

Supplementary Figure 93. HRMS spectrum of Compound **2s**.

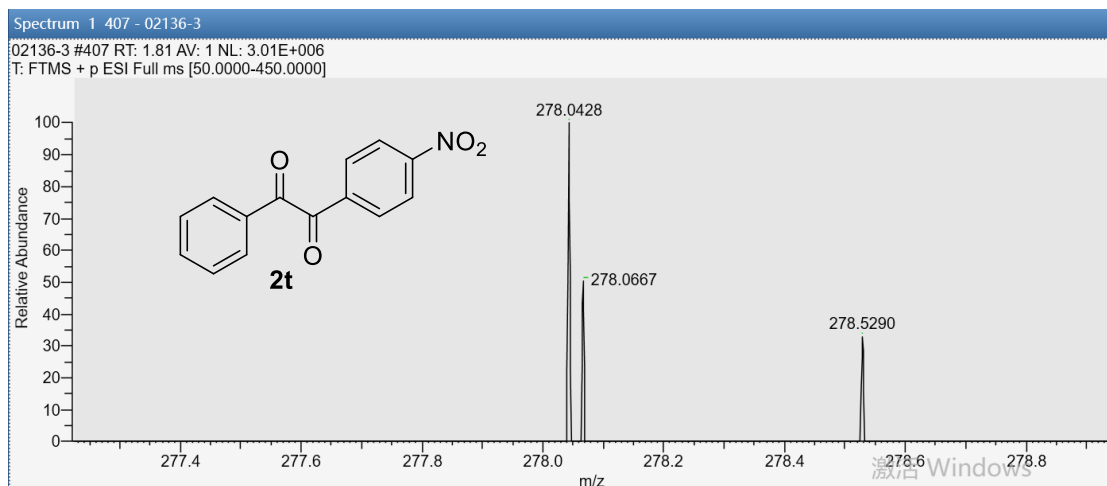

Supplementary Figure 94. HRMS spectrum of Compound **2t**.

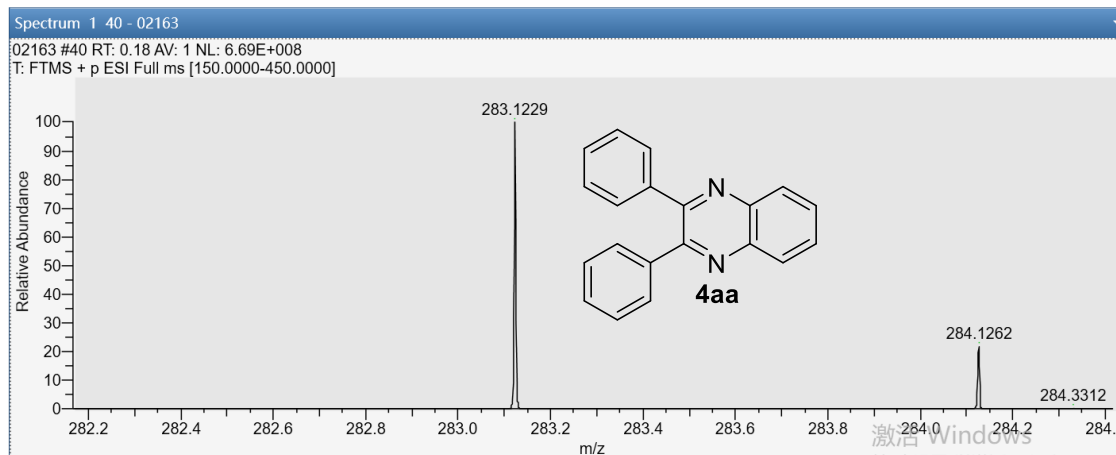

Supplementary Figure 95. HRMS spectrum of Compound **4aa**.

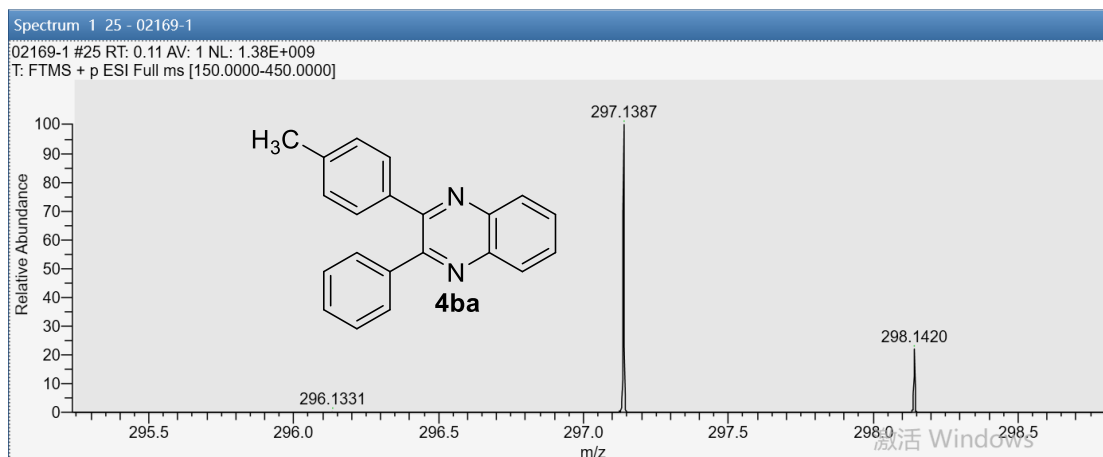

Supplementary Figure 96. HRMS spectrum of Compound **4ba**.

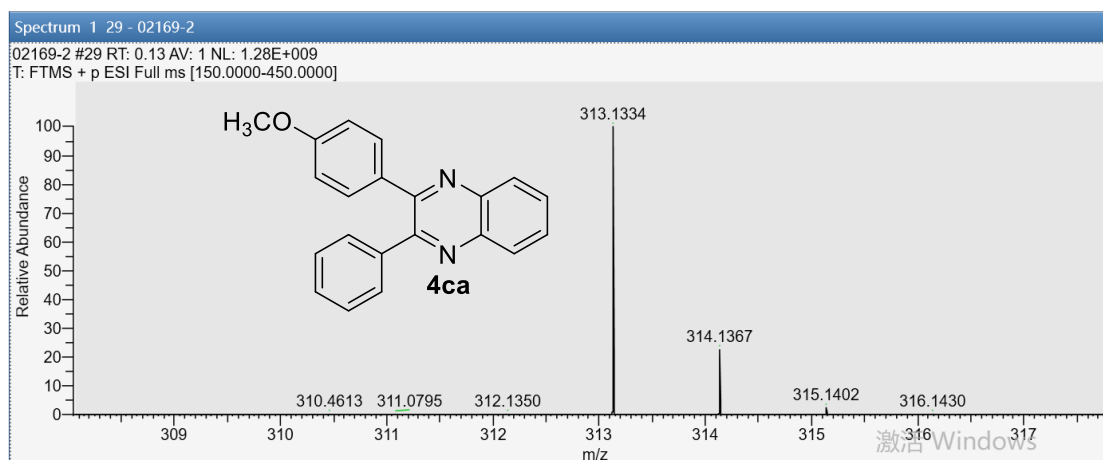

Supplementary Figure 97. HRMS spectrum of Compound **4ca**.

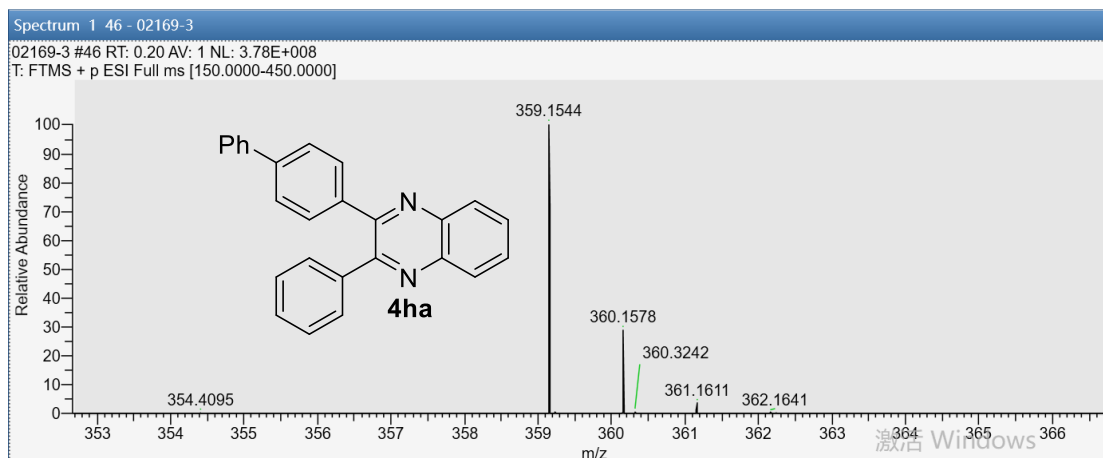

Supplementary Figure 98. HRMS spectrum of Compound **4ha**.



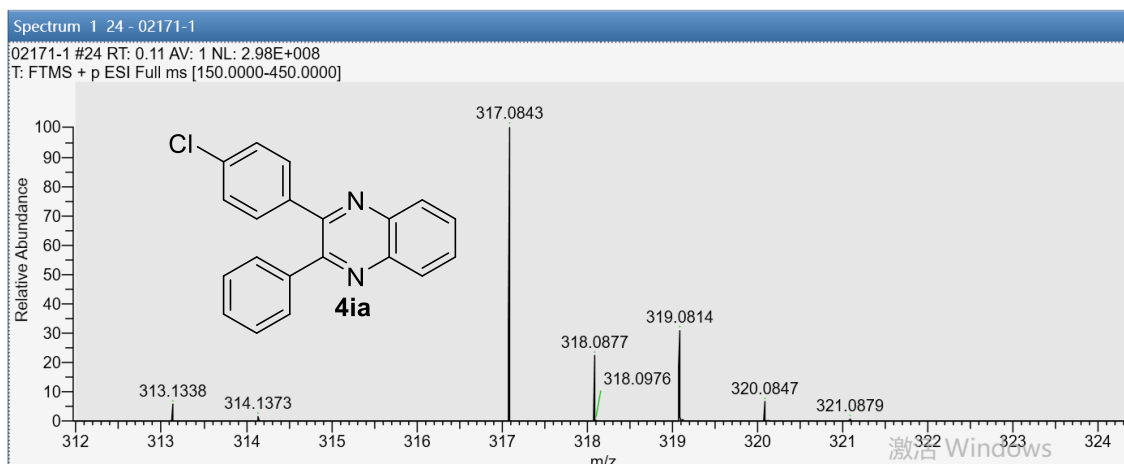

**Supplementary Figure 99.** HRMS spectrum of Compound **4ia**.

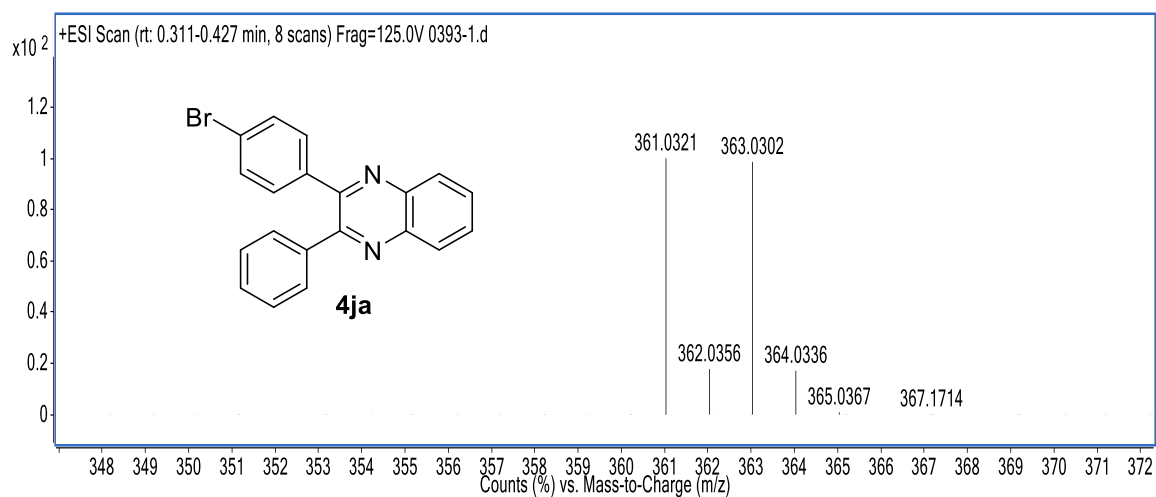

**Supplementary Figure 100.** HRMS spectrum of Compound **4ja**.

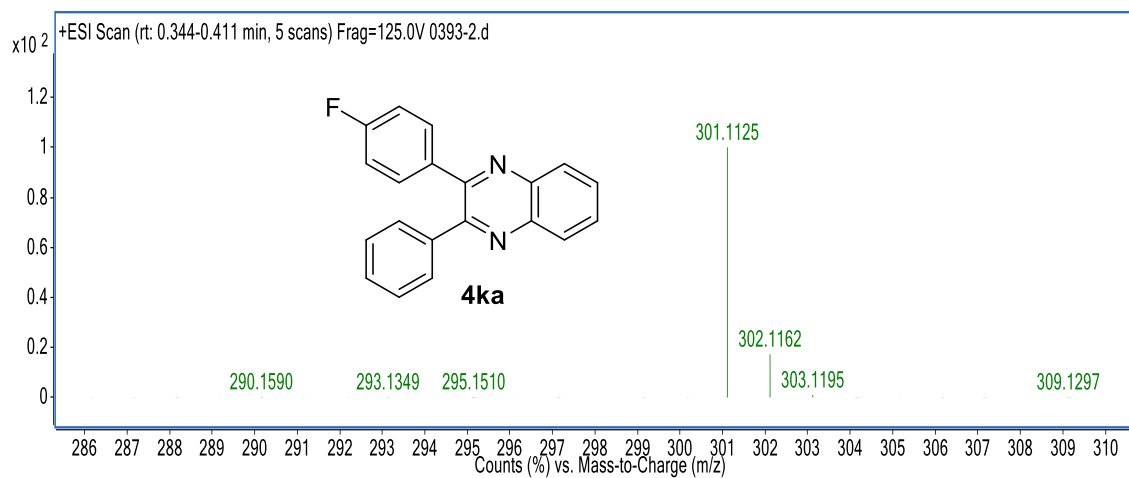

**Supplementary Figure 101.** HRMS spectrum of Compound **4ka**.

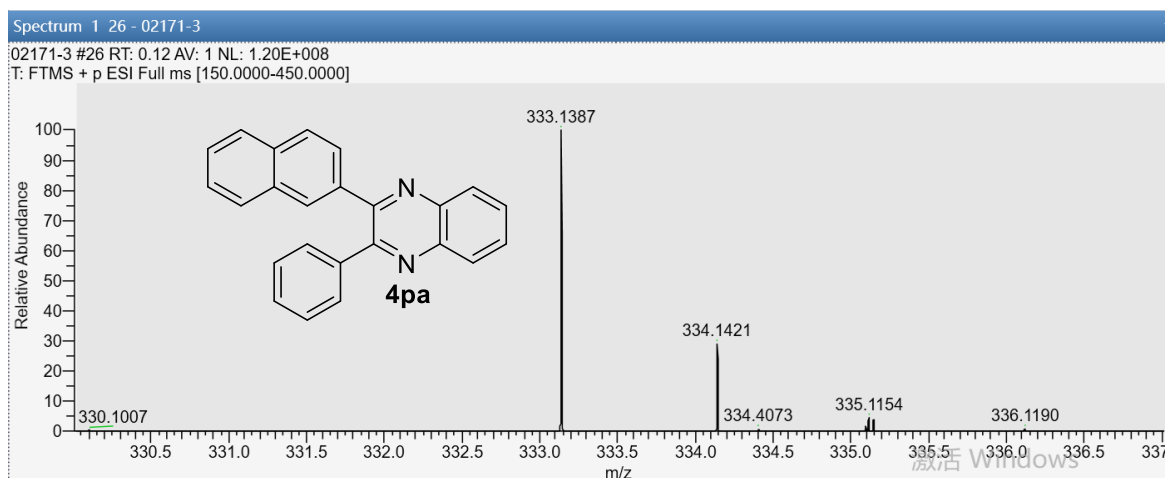

Supplementary Figure 102. HRMS spectrum of Compound **4pa**.

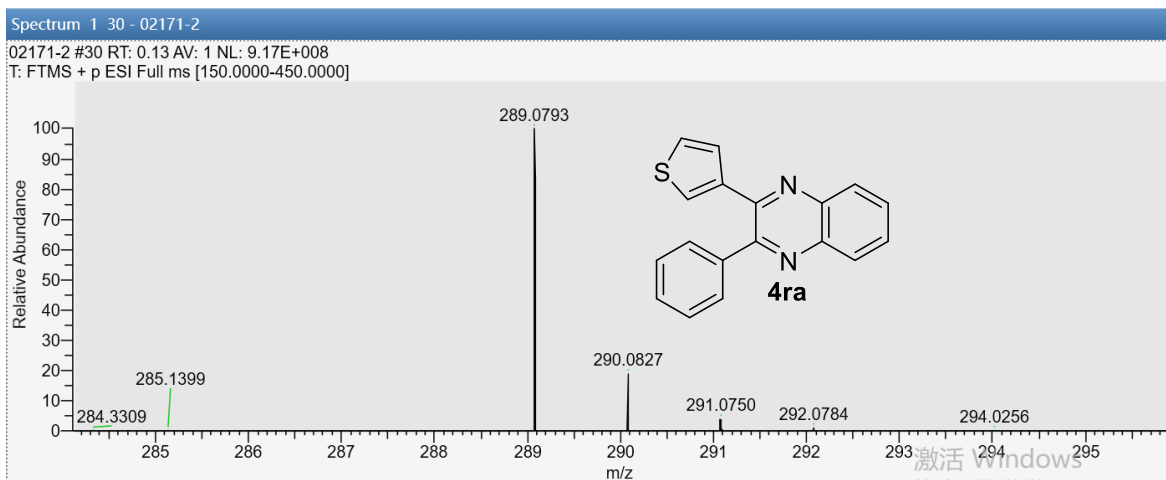

Supplementary Figure 103. HRMS spectrum of Compound **4ra**.

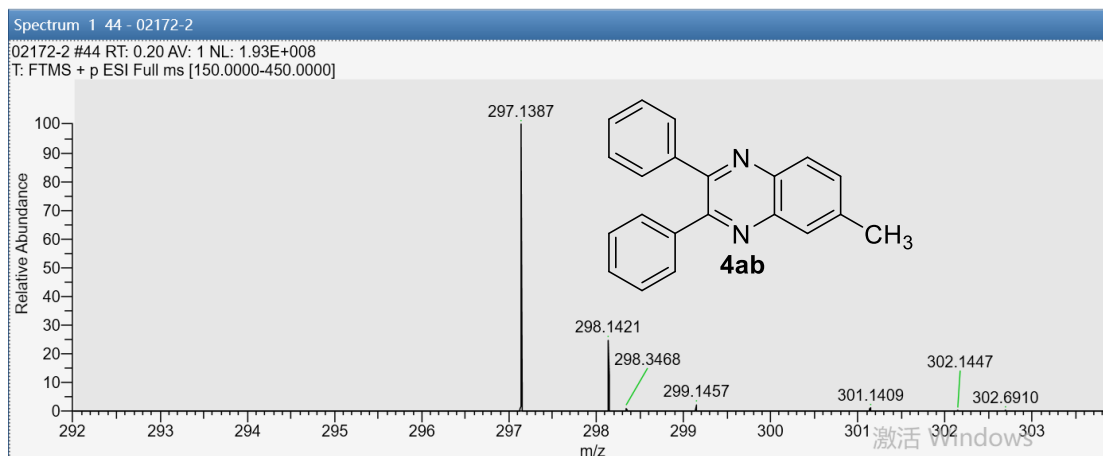

Supplementary Figure 104. HRMS spectrum of Compound **4ab**.

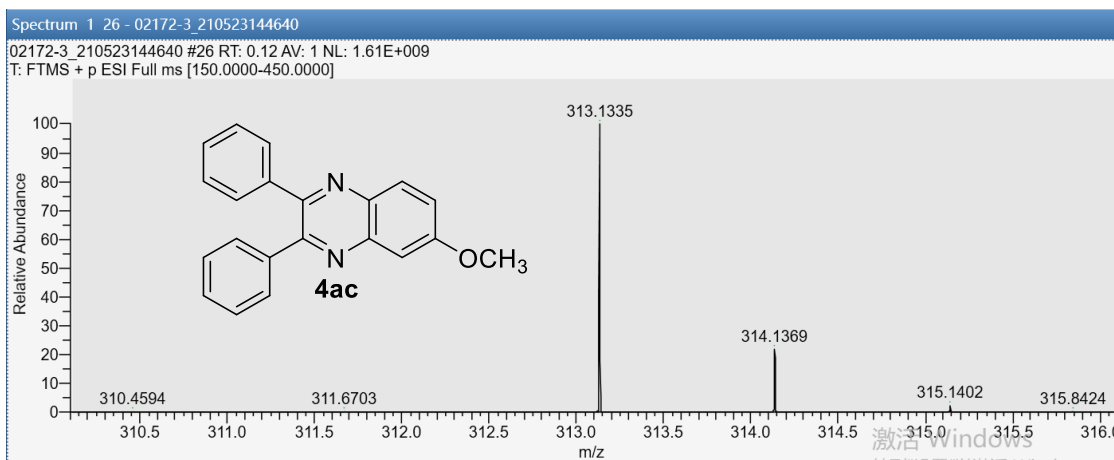

Supplementary Figure 105. HRMS spectrum of Compound **4ac**.

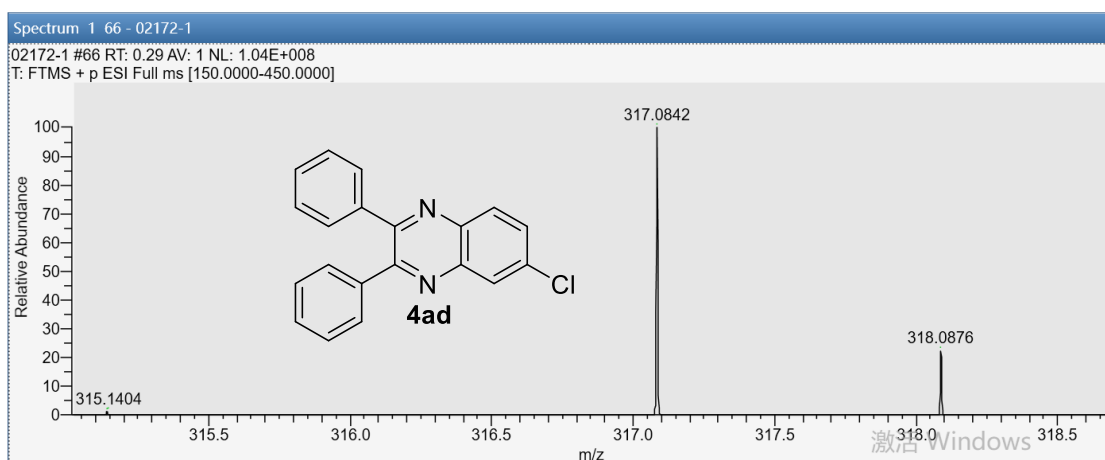

Supplementary Figure 106. HRMS spectrum of Compound **4ad**.

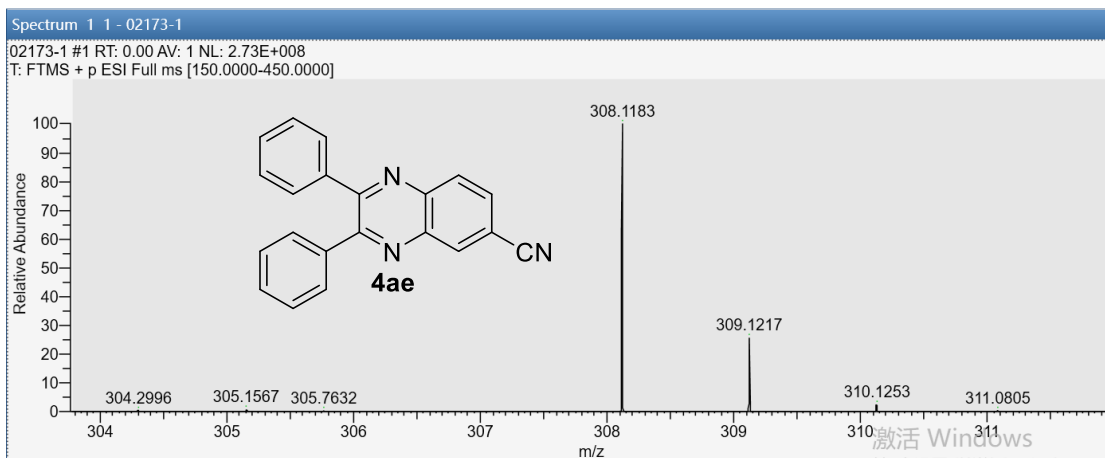

Supplementary Figure 107. HRMS spectrum of Compound **4ae**.

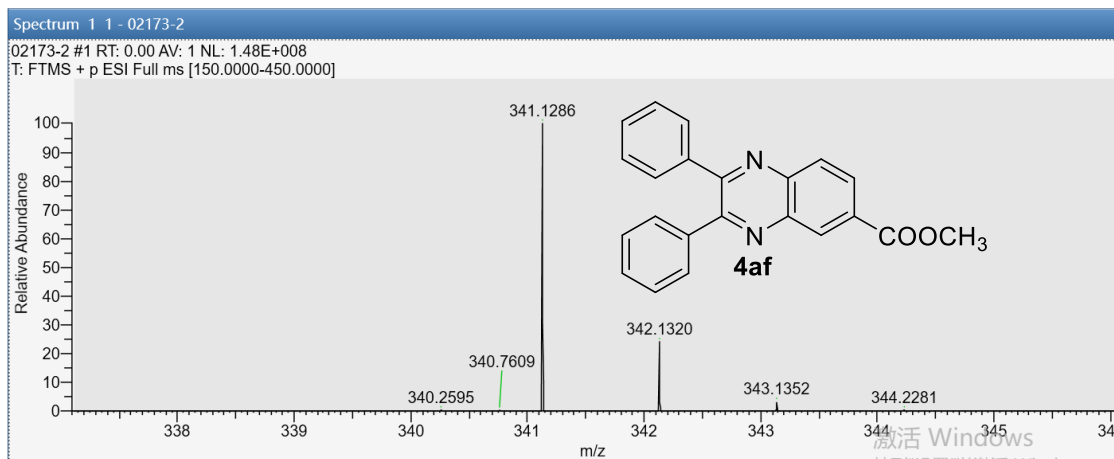

Supplementary Figure 108. HRMS spectrum of Compound **4af**.

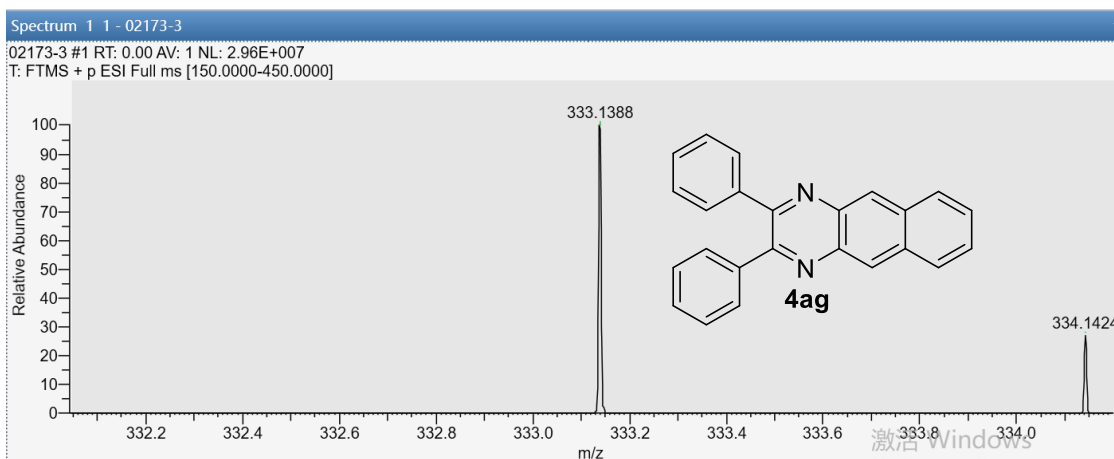

Supplementary Figure 109. HRMS spectrum of Compound **4ag**.

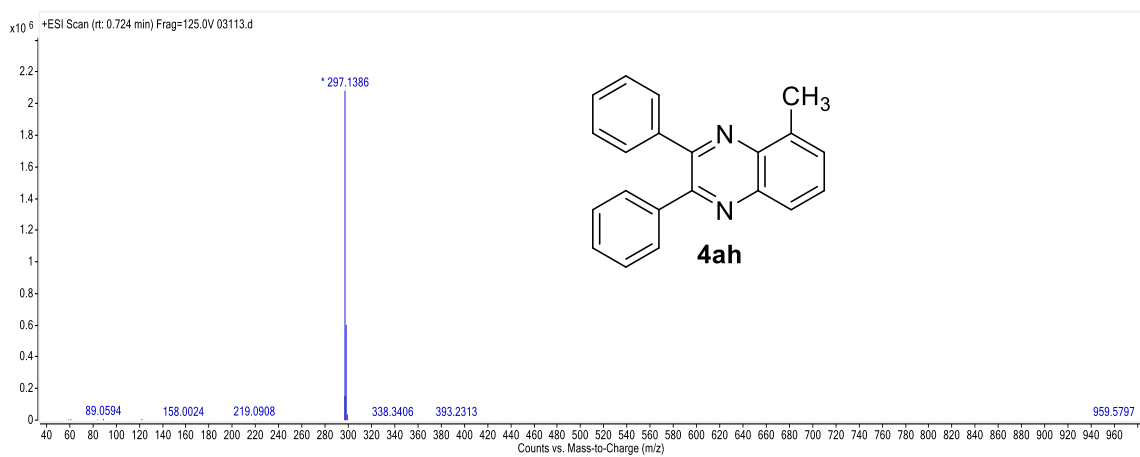

Supplementary Figure 110. HRMS spectrum of Compound **4ah**.

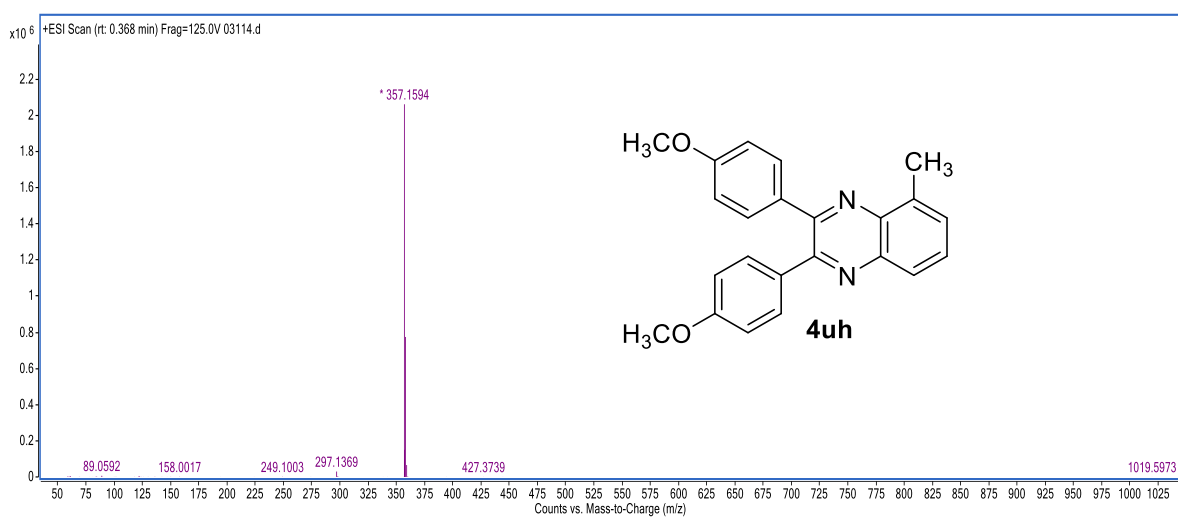

**Supplementary Figure 111.** HRMS spectrum of Compound **4uh**.
